# Supplementary material for: Iodomethane in C1 chemistry: application in palladium-catalyzed [2 + 2 + 1] annulation
Source: Royal Society of Chemistry journal article supplement (doi:10.1039/d4ob00329b), 2024-01-01

# Iodomethane in C1 chemistry: Application in palladium-catalyzed [2 + 2 + 1] annulation

Jin-Ke Zhang,<sup>a†</sup> Yu-Chen Fang,<sup>a,b†</sup> Jia-He Chen,<sup>a</sup> Jing Shan,<sup>a</sup> Mei Bai,<sup>a,c</sup> Qiang Huang,<sup>a,c</sup>  
Yong-Zheng Chen<sup>a,c</sup> and Wen-Yong Han<sup>a,c\*</sup>

<sup>a</sup>Key Laboratory of Biocatalysis & Chiral Drug Synthesis of Guizhou Province, School of Pharmacy, Zunyi Medical University, Zunyi 563006, P. R. China

<sup>b</sup>School of Chemistry & Chemical Engineering, Xinjiang Normal University, Urumqi 830054, P. R. China

<sup>c</sup>Key Laboratory of Basic Pharmacology of Ministry of Education and Joint International Research Laboratory of Ethnomedicine of Ministry of Education, Zunyi Medical University, Zunyi 563006, P. R. China

† These authors contributed equally to this work.

E-mail: hanwy@126.com; hanwy@zmu.edu.cn

## Electronic Supplementary Information

### Table of Contents

|                                                                                         |     |
|-----------------------------------------------------------------------------------------|-----|
| 1. General experimental information.....                                                | S1  |
| 2. Optimization of the reaction conditions for the construction of <b>4a</b> .....      | S2  |
| 3. Synthetic methods of substrates.....                                                 | S4  |
| 3.1 Synthesis of 3-iodochromones <b>1</b> .....                                         | S4  |
| 3.2 Synthesis of bridged olefins <b>2</b> .....                                         | S4  |
| 4. Synthesis of substrate <b>5</b> .....                                                | S5  |
| 5. Representative procedure for the synthesis of compound <b>4a</b> .....               | S6  |
| 6. Characterization data of compounds <b>4a-6b</b> .....                                | S6  |
| 7. Preparative-scale experiments.....                                                   | S22 |
| 7.1 Synthesis of <b>4ab</b> on a gram-scale .....                                       | S22 |
| 7.2 Synthesis of <b>4ag</b> on a gram-scale .....                                       | S22 |
| 8. Reference.....                                                                       | S24 |
| 9. <sup>1</sup> H and <sup>13</sup> C NMR spectra of <b>4a-ak</b> and <b>6a-b</b> ..... | S25 |

## 1. General experimental information

Unless otherwise noted, all commercially available reagents were used without further purification. All of the solvents were treated according to known methods. Column chromatography was performed on silica gel (200-400 mesh). <sup>1</sup>H-NMR (400 MHz) chemical shifts were reported in ppm ( $\delta$ ) relative to tetramethylsilane (TMS) with the solvent resonance employed as the internal standard. <sup>13</sup>C NMR (100 MHz) chemical shifts were reported in ppm ( $\delta$ ) from tetramethylsilane (TMS) with the solvent resonance as the internal standard. Data were reported as follows: chemical shift, multiplicity (s = singlet, d = doublet, t = triplet, dd = doublet of doublets, td = triplet of doublets, ddd = doublet of doublet of doublets, dt = doublet of triplets, dq = doublet of quartets, m = multiplet), coupling constants (Hz) and integration. HRMS measurements were obtained on a TOF analyzer. Melting points were uncorrected.

3-Iodochromones (**1**) were prepared according to the reported procedures.<sup>1</sup> Bridged olefins **2a-c** were purchased from commercial suppliers. Bridged olefins **2d** and **2e** were prepared according to the reported procedures.<sup>2,3</sup> Iodomethane (**3**) and all ligands used in the optimization of reaction conditions were purchased from Bidepharm (China), Tansoole (China) or Innochem (China).

## 2. Optimization of the reaction conditions for the construction of 4a<sup>a</sup>

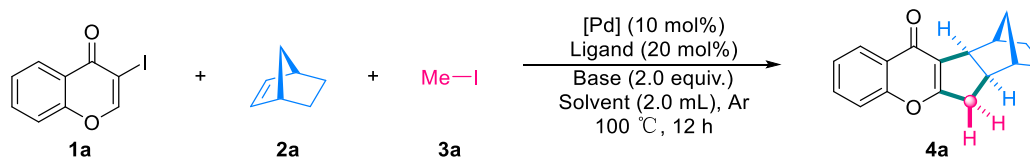

| Entry | Catalyst                           | Ligand                                                                               | Base                            | Solvent    | Yield <sup>b</sup> |
|-------|------------------------------------|--------------------------------------------------------------------------------------|---------------------------------|------------|--------------------|
| 1     | Pd(OAc) <sub>2</sub>               | P(2,4,6-(CH <sub>3</sub> ) <sub>3</sub> C <sub>6</sub> H <sub>3</sub> ) <sub>3</sub> | Cs <sub>2</sub> CO <sub>3</sub> | Toluene    | 22                 |
| 2     | Pd(OAc) <sub>2</sub>               | Johnphos                                                                             | Cs <sub>2</sub> CO <sub>3</sub> | Toluene    | 25                 |
| 3     | Pd(OAc) <sub>2</sub>               | Sphos                                                                                | Cs <sub>2</sub> CO <sub>3</sub> | Toluene    | 33                 |
| 4     | Pd(OAc) <sub>2</sub>               | P(2-OMe-C <sub>6</sub> H <sub>4</sub> ) <sub>3</sub>                                 | Cs <sub>2</sub> CO <sub>3</sub> | Toluene    | 35                 |
| 5     | Pd(OAc) <sub>2</sub>               | P(4-Me-C <sub>6</sub> H <sub>4</sub> ) <sub>3</sub>                                  | Cs <sub>2</sub> CO <sub>3</sub> | Toluene    | 42                 |
| 6     | Pd(OAc) <sub>2</sub>               | P(3,5-(CF <sub>3</sub> ) <sub>2</sub> C <sub>6</sub> H <sub>4</sub> ) <sub>3</sub>   | Cs <sub>2</sub> CO <sub>3</sub> | Toluene    | 45                 |
| 7     | Pd(OAc) <sub>2</sub>               | P(4-CF <sub>3</sub> -C <sub>6</sub> H <sub>4</sub> ) <sub>3</sub>                    | Cs <sub>2</sub> CO <sub>3</sub> | Toluene    | 77                 |
| 8     | Pd(OAc) <sub>2</sub>               | P(3-FC <sub>6</sub> H <sub>4</sub> )                                                 | Cs <sub>2</sub> CO <sub>3</sub> | Toluene    | 80                 |
| 9     | Pd(OAc) <sub>2</sub>               | TFP                                                                                  | Cs <sub>2</sub> CO <sub>3</sub> | Toluene    | 81                 |
| 10    | Pd(OAc) <sub>2</sub>               | PPh <sub>3</sub>                                                                     | Cs <sub>2</sub> CO <sub>3</sub> | Toluene    | 92                 |
| 11    | Pd(PPh <sub>3</sub> ) <sub>4</sub> | PPh <sub>3</sub>                                                                     | Cs <sub>2</sub> CO <sub>3</sub> | Toluene    | 54                 |
| 12    | Pd(dba) <sub>2</sub>               | PPh <sub>3</sub>                                                                     | Cs <sub>2</sub> CO <sub>3</sub> | Toluene    | 66                 |
| 13    | PdBr <sub>2</sub>                  | PPh <sub>3</sub>                                                                     | Cs <sub>2</sub> CO <sub>3</sub> | Toluene    | 70                 |
| 14    | Pd(TFA) <sub>2</sub>               | PPh <sub>3</sub>                                                                     | Cs <sub>2</sub> CO <sub>3</sub> | Toluene    | 87                 |
| 15    | Pd(OAc) <sub>2</sub>               | PPh <sub>3</sub>                                                                     | Cs <sub>2</sub> CO <sub>3</sub> | Mesitylene | 89                 |
| 16    | Pd(OAc) <sub>2</sub>               | PPh <sub>3</sub>                                                                     | Cs <sub>2</sub> CO <sub>3</sub> | DMSO       | N.R.               |

|    |                      |                  |                                 |             |       |
|----|----------------------|------------------|---------------------------------|-------------|-------|
| 17 | Pd(OAc) <sub>2</sub> | PPh <sub>3</sub> | Cs <sub>2</sub> CO <sub>3</sub> | DMF         | trace |
| 18 | Pd(OAc) <sub>2</sub> | PPh <sub>3</sub> | Cs <sub>2</sub> CO <sub>3</sub> | 1,4-dioxane | 90    |
| 19 | Pd(OAc) <sub>2</sub> | PPh <sub>3</sub> | Na <sub>2</sub> CO <sub>3</sub> | Toluene     | N.R.  |
| 20 | Pd(OAc) <sub>2</sub> | PPh <sub>3</sub> | K <sub>3</sub> PO <sub>4</sub>  | Toluene     | 22    |
| 21 | Pd(OAc) <sub>2</sub> | PPh <sub>3</sub> | K <sub>2</sub> CO <sub>3</sub>  | Toluene     | 25    |
| 22 | Pd(OAc) <sub>2</sub> | PPh <sub>3</sub> | NaO <sup>t</sup> Bu             | Toluene     | 17    |

<sup>a</sup> Unless otherwise noted, all reactions were performed with **1a** (0.2 mmol, 1.0 equiv.), **2a** (0.4 mmol, 2.0 equiv.), **3a** (0.3 mmol, 1.5 equiv.), Pd-catalyst (10 mol%), ligand (20 mol%), base (0.4 mmol, 2.0 equiv.) in 2.0 mL of solvent under Ar atmosphere at 100 °C for 12 h. <sup>b</sup> Isolated yields based on **1a** were given. N.R.: no reaction.

### 3. Synthetic methods of substrates

#### 3.1 Synthesis of 3-iodochromones **1**

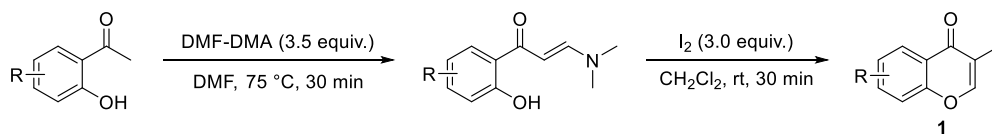

A solution of substituted 2-hydroxyacetophenones (10 mmol, 1.0 equiv.) and DMF-DMA (35 mmol, 3.5 equiv.) in *N,N*-dimethylformamide (DMF, 30 mL) was stirred at 75 °C (oil bath) for 30 min. After the mixture was cooled to room temperature, saturated brine (100 mL) was added and an orange precipitate appeared. The solid was separated to afford the substituted 3-(dimethylamino)-1-(2-hydroxyphenyl)propanones.

3-(Dimethylamino)-1-(2-hydroxyphenyl)propanones were dissolved in 30 mL of CH<sub>2</sub>Cl<sub>2</sub> (DCM), added iodine (30.0 mmol, 3.0 equiv.), and the mixture was stirred at room temperature for 0.5 h. After completion of the reaction, the solution of 5% NaHSO<sub>3</sub> was added into the mixture. 5% NaHCO<sub>3</sub> (3 × 25 mL) was used to wash the organic phase and the solution was extracted three times with DCM (3 × 20 mL). The combined organic phase was concentrated and purified by flash chromatography on silica gel (petroleum ether/ethyl acetate = 10:1) to give 3-iodochromones (**1**).<sup>1</sup>

#### 3.2 Synthesis of bridged olefins **2**

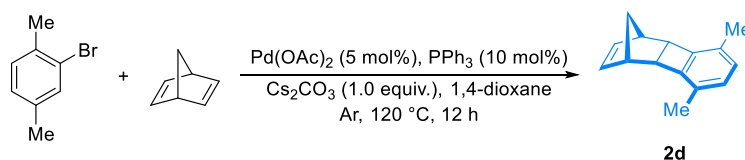

PPh<sub>3</sub> (54 mg, 0.2 mmol, 10 mol%), Pd(OAc)<sub>2</sub> (22.6 mg, 0.1 mmol, 5 mol%), Cs<sub>2</sub>CO<sub>3</sub> (752 mg, 2.0 mmol, 1.0 equiv.), 1,4-dioxane (3 mL), 2-bromo-*p*-xylene (290 mg, 2.0 mmol, 1.0 equiv.), and norbornadiene (NBDE, 553 mg, 6.0 mmol, 3.0 equiv.) were added into a 10 mL glass vial, which was evacuated and filled with argon three times. Then the reaction mixture was stirred at room temperature for 5 min, and then heated to 120 °C for 12 h. After completion of the reaction, the mixture was cooled to room temperature and passed through a thin layer of Celite bed and washed with ethyl acetate to remove inorganic salts. The filtrate was evaporated under reduced pressure and purified by silica gel chromatography (eluted with hexanes) to afford compound **2d** as a colorless oil (161 mg, 41% yield).<sup>2</sup>

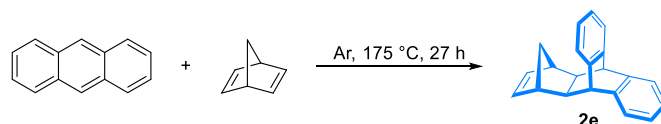

Anthracene (891 mg, 5 mmol, 1.0 equiv.) and norbornadiene (NBDE, 2.3 g, 25 mmol, 5.0 equiv.) were added into a sealed glass tube under argon atmosphere. The mixture was stirred for 27 h at 175 °C in a heating module. After the completion of this reaction and cooling to room temperature, the mixture was purified by flash column chromatography on silica gel (petroleum ether) to afford the desired product **2e** as a white solid (1.08 g, 79% yield).<sup>3</sup>

#### 4. Synthesis of substrate **5**

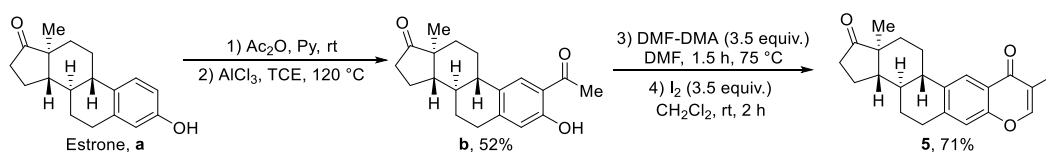

To a solution of estrone (**a**, 811 mg, 3.0 mmol, 1.0 equiv.) in pyridine (Py, 4 mL) was added acetic anhydride (Ac<sub>2</sub>O, 1.99 g, 19.5 mmol, 6.5 equiv.) at ice-bath condition. After that, the reaction was stirred for 16 h at room temperature. To the tetrachloroethane (TCE, 30 mL, 0.1 M) was added AlCl<sub>3</sub> (1.00 g, 7.5 mmol, 2.5 equiv.) and the mixture was stirred at 90 °C in oil bath for 10 min, followed by the addition of a solution of estrone acetate (937 mg, 3 mmol, 1.0 equiv.) in DCM (3 mL, 1 M). The reaction was stirred at 120 °C (oil bath) for 8 h before poured into cold 2 M HCl (25 mL) and extracted with DCM (3 × 30 mL). The organic phase was washed with saturated NaHCO<sub>3</sub> solution (20 mL), brine (20 mL) and dried over Na<sub>2</sub>SO<sub>4</sub>. After the evaporation of solvent, the crude product was purified by column chromatography (petroleum ether/ethyl acetate = 5:1) to give the product **b** as a yellow solid (487 mg, 52% yield).<sup>4b</sup>

A solution of **b** (487 mg, 1.56 mmol, 1.0 equiv.) and DMF-DMA (650 mg, 5.46 mmol, 3.5 equiv.) in DMF (30 mL) was stirred at 75 °C in oil bath for 1.5 h. After completion of the reaction, saturated brine (80 mL) was added to the mixture, and the resulting solid was filtrated. To a solution of the solid in DCM (30 mL) was added iodine (1381 mg, 5.46 mmol, 3.5 equiv.), and the mixture was stirred at room temperature for 2 h. After completion, the solution was quenched with 5% NaHSO<sub>3</sub> (60 mL), and was extracted with 50 mL DCM three times. The combined organic fractions were condensed and purified by flash column chromatography (petroleum ether/ethyl acetate = 5:1 ~ 3:1) to give the product **5** as a white solid (496 mg, 71% yield).<sup>4c</sup> Characterization data of **1**, **2** and **5** can be found in previously reported.<sup>4</sup>

## 5. Representative procedure for the synthesis of compound 4a

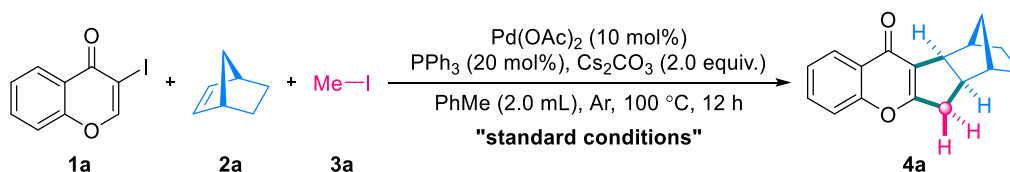

**1a** (54.4 mg, 0.2 mmol, 1.0 equiv.), **2a** (37.7 mg, 0.4 mmol, 2.0 equiv.), Pd(OAc)<sub>2</sub> (4.5 mg, 0.02 mmol, 10 mol%), PPh<sub>3</sub> (10.5 mg, 0.04 mmol, 20 mol%), Cs<sub>2</sub>CO<sub>3</sub> (130.2 mg, 0.4 mmol, 2.0 equiv.) and toluene (2.0 mL) were added into a 4 mL flame-dried vial with a magnetic stir bar. The reaction vial was evacuated and backfilled with argon three times, then, **3a** (42.4mg, 0.3mmol, 1.5 equiv.) was added into flask, and the mixture was stirred at 100 °C (heating module) for 12 h. After completion of the reaction, it was concentrated to remove solvent and purified by flash column chromatography on silica gel (petroleum ether/ethyl acetate = 10:1) to afford the product **4a** (46.2 mg, 92% yield).

## 6. Characterization data of compounds 4a-6b

Scheme 2, 4a

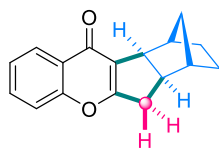

Compound **4a**: yellow solid, 46.2 mg, 92% yield, m.p. 131.2 – 133.0 °C (lit.<sup>4c</sup> m.p. 134.4 – 135.6 °C); <sup>1</sup>H-NMR (CDCl<sub>3</sub>, 400 MHz) δ 8.16 (dd, *J* = 8.0, 1.7 Hz, 1H), 7.53 (ddd, *J* = 8.6, 7.1, 1.7 Hz, 1H), 7.37 – 7.27 (m, 2H), 3.16 – 3.01 (m, 2H), 2.55 – 2.43 (m, 2H), 2.29 – 2.20 (m, 1H), 2.00 (d, *J* = 4.1 Hz, 1H), 1.60 – 1.41 (m, 2H), 1.39 – 1.30 (m, 1H), 1.24 – 1.12 (m, 2H), 1.04 (dt, *J* = 10.3, 1.6 Hz, 1H); <sup>13</sup>C-NMR (CDCl<sub>3</sub>, 100 MHz) δ 176.2, 169.7, 156.8, 132.7, 125.7, 124.7, 124.3, 122.2, 117.9, 49.8, 42.8, 40.4, 39.2, 38.4, 32.3, 28.8, 28.5; <sup>1</sup>H and <sup>13</sup>C NMR data are consistent with previously reported.<sup>4c</sup>

Scheme 2, 4b

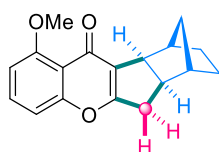

Compound **4b**: yellow solid, 43.6 mg, 77% yield, m.p. 179.8 – 180.8 °C; <sup>1</sup>H-NMR (CDCl<sub>3</sub>, 400 MHz) δ 7.45 (t, *J* = 8.3 Hz, 1H), 6.95 (d, *J* = 8.4 Hz, 1H), 6.75 (d, *J* = 8.2 Hz, 1H), 3.94 (s, 3H), 3.15 – 3.02 (m,

2H), 2.58 (d,  $J = 4.0$  Hz, 1H), 2.53 – 2.41 (m, 1H), 2.30 – 2.21 (m, 1H), 2.03 (d,  $J = 4.1$  Hz, 1H), 1.63 – 1.44 (m, 2H), 1.41 – 1.32 (m, 1H), 1.29 – 1.14 (m, 2H), 1.10 – 1.02 (m, 1H);  $^{13}\text{C}$ -NMR ( $\text{CDCl}_3$ , 100 MHz)  $\delta$  176.6, 167.2, 160.2, 159.3, 132.8, 123.6, 115.0, 110.3, 106.3, 56.5, 50.1, 42.9, 40.7, 39.1, 38.1, 32.4, 28.8, 28.7;  $^1\text{H}$  and  $^{13}\text{C}$  NMR data are consistent with previously reported.<sup>4c</sup>

Scheme 2, 4c

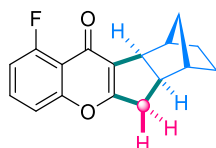

Compound **4c**: yellow solid, 44.9 mg, 83% yield, m.p. 146.2 – 148.3 °C (lit.<sup>4c</sup> m.p. 149.6 – 150.6 °C);  $^1\text{H}$ -NMR ( $\text{CDCl}_3$ , 400 MHz)  $\delta$  7.49 (td,  $J = 8.3, 5.4$  Hz, 1H), 7.18 (d,  $J = 8.5$  Hz, 1H), 6.98 (dd,  $J = 10.8, 8.2$  Hz, 1H), 3.19 – 3.03 (m, 2H), 2.59 – 2.45 (m, 2H), 2.34 – 2.23 (m, 1H), 2.05 (d,  $J = 4.1$  Hz, 1H), 1.63 – 1.45 (m, 2H), 1.41 – 1.33 (m, 1H), 1.27 – 1.17 (m, 2H), 1.09 (dt,  $J = 10.4, 1.7$  Hz, 1H);  $^{13}\text{C}$ -NMR ( $\text{CDCl}_3$ , 100 MHz)  $\delta$  174.9, 168.6, 161.2 (d,  $J = 263.8$  Hz), 158.2 (d,  $J = 3.9$  Hz), 132.7 (d,  $J = 10.9$  Hz), 123.3, 114.9 (d,  $J = 10.0$  Hz), 114.0 (d,  $J = 4.5$  Hz), 111.9 (d,  $J = 21.2$  Hz), 49.9, 42.9, 40.5, 39.1, 38.2, 32.4, 28.8, 28.6;  $^1\text{H}$  and  $^{13}\text{C}$  NMR data are consistent with previously reported.<sup>4c</sup>

Scheme 2, 4d

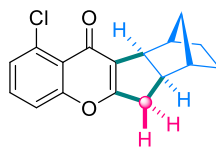

Compound **4d**: yellow solid, 48.1 mg, 84% yield, m.p. 174.0 – 175.1 °C (lit.<sup>4c</sup> m.p. 172.3 – 174.0 °C);  $^1\text{H}$ -NMR ( $\text{CDCl}_3$ , 400 MHz)  $\delta$  7.42 (t,  $J = 8.1$  Hz, 1H), 7.30 (t,  $J = 7.6$  Hz, 2H), 3.19 – 2.99 (m, 2H), 2.61 – 2.44 (m, 2H), 2.29 (td,  $J = 9.9, 9.4, 3.8$  Hz, 1H), 2.05 (d,  $J = 4.1$  Hz, 1H), 1.62 – 1.47 (m, 2H), 1.39 – 1.32 (m, 1H), 1.27 – 1.17 (m, 2H), 1.09 (dt,  $J = 10.4, 1.6$  Hz, 1H);  $^{13}\text{C}$ -NMR ( $\text{CDCl}_3$ , 100 MHz)  $\delta$  175.3, 168.1, 158.7, 133.7, 131.9, 128.0, 123.5, 121.3, 117.4, 50.1, 42.9, 40.7, 39.1, 38.2, 32.4, 28.8, 28.6;  $^1\text{H}$  and  $^{13}\text{C}$  NMR data are consistent with previously reported.<sup>4c</sup>



Scheme 2, 4e

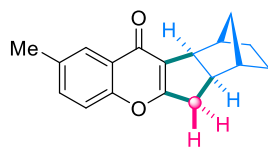

Compound **4e**: yellow solid, 46.2 mg, 87% yield, m.p. 136.6 – 137.4 °C (lit.<sup>4c</sup> m.p. 144.3 – 144.6 °C); <sup>1</sup>H-NMR (CDCl<sub>3</sub>, 400 MHz) δ 7.97 (d, *J* = 2.3 Hz, 1H), 7.37 (dd, *J* = 8.5, 2.2 Hz, 1H), 7.27 (d, *J* = 8.8 Hz, 1H), 3.17 – 3.05 (m, 2H), 2.56 – 2.46 (m, 2H), 2.40 (s, 3H), 2.28 (td, *J* = 10.2, 9.8, 3.7 Hz, 1H), 2.03 (d, *J* = 4.1 Hz, 1H), 1.63 – 1.45 (m, 2H), 1.42 – 1.34 (m, 1H), 1.27 – 1.16 (m, 2H), 1.07 (d, *J* = 9.8 Hz, 1H); <sup>13</sup>C-NMR (CDCl<sub>3</sub>, 100 MHz) δ 176.5, 169.7, 155.2, 134.6, 134.0, 125.3, 124.1, 122.2, 117.7, 49.9, 43.0, 40.6, 39.3, 38.5, 32.4, 28.9, 28.7, 21.0; <sup>1</sup>H and <sup>13</sup>C NMR data are consistent with previously reported.<sup>4c</sup>

Scheme 2, 4f

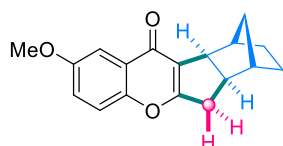

Compound **4f**: yellow solid, 46.7 mg, 83% yield, m.p. 124.5 – 126.3 °C (lit.<sup>4c</sup> m.p. 127.1 – 128.8 °C); <sup>1</sup>H-NMR (400 MHz, CDCl<sub>3</sub>) δ 7.57 (d, *J* = 3.1 Hz, 1H), 7.31 (d, *J* = 9.1 Hz, 1H), 7.16 (dd, *J* = 9.1, 2.9 Hz, 1H), 3.86 (s, 3H), 3.21 – 3.05 (m, 2H), 2.60 – 2.46 (m, 2H), 2.29 (td, *J* = 10.7, 9.8, 3.6 Hz, 1H), 2.04 (d, *J* = 4.1 Hz, 1H), 1.64 – 1.45 (m, 2H), 1.43 – 1.35 (m, 1H), 1.27 – 1.17 (m, 2H), 1.07 (d, *J* = 10.2 Hz, 1H); <sup>13</sup>C-NMR (CDCl<sub>3</sub>, 100 MHz) δ 176.1, 169.7, 156.7, 151.8, 125.0, 122.6, 121.7, 119.3, 105.2, 55.9, 49.9, 43.0, 40.6, 39.3, 38.4, 32.4, 28.9, 28.7; <sup>1</sup>H and <sup>13</sup>C NMR data are consistent with previously reported.<sup>4c</sup>

Scheme 2, 4g

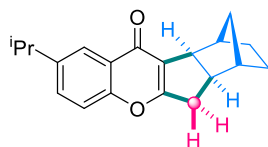

Compound **4g**: yellow solid, 50.1 mg, 85% yield, m.p. 151.6 – 153.2 °C; <sup>1</sup>H-NMR (400 MHz, CDCl<sub>3</sub>) δ 8.05 (d, *J* = 2.3 Hz, 1H), 7.45 (dd, *J* = 8.6, 2.3 Hz, 1H), 7.31 (d, *J* = 8.6 Hz, 1H), 3.29 – 3.06 (m, 2H), 3.01 (h, *J* = 6.9 Hz, 1H), 2.64 – 2.44 (m, 2H), 2.38 – 2.22 (m, 1H), 2.03 (d, *J* = 4.1 Hz, 1H), 1.69 – 1.44

(m, 2H), 1.39 (td,  $J = 10.0, 8.3, 2.5$  Hz, 1H), 1.32 – 1.14 (m, 8H), 1.12 – 1.00 (m, 1H);  $^{13}\text{C}$ -NMR ( $\text{CDCl}_3$ , 100 MHz)  $\delta$  176.6, 169.7, 155.4, 145.6, 131.6, 124.1, 122.6, 122.2, 117.8, 49.9, 43.0, 40.5, 39.3, 38.5, 33.8, 32.4, 28.9, 28.7, 24.1, 24.0; HRMS (ESI-TOF): calcd. for  $[\text{C}_{20}\text{H}_{23}\text{O}_2]^+ [\text{M} + \text{H}]^+$  295.1693; found 295.1692.

Scheme 2, 4h

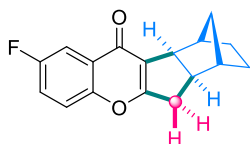

Compound **4h**: yellow solid, 44.6 mg, 83% yield, m.p. 157.6 – 159.8 °C (lit.<sup>4c</sup> m.p. 158.8 – 159.8 °C);  $^1\text{H}$ -NMR (400 MHz,  $\text{CDCl}_3$ )  $\delta$  7.83 (dd,  $J = 8.5, 3.1$  Hz, 1H), 7.39 (dd,  $J = 9.1, 4.2$  Hz, 1H), 7.33 – 7.27 (m, 1H), 3.21 – 3.05 (m, 2H), 2.58 – 2.48 (m, 2H), 2.37 – 2.26 (m, 1H), 2.06 (d,  $J = 4.1$  Hz, 1H), 1.63 – 1.47 (m, 2H), 1.42 – 1.34 (m, 1H), 1.27 – 1.18 (m, 2H), 1.09 (d,  $J = 10.4$  Hz, 1H);  $^{13}\text{C}$ -NMR ( $\text{CDCl}_3$ , 100 MHz)  $\delta$  175.5 (d,  $J = 2.1$  Hz), 170.4, 159.7 (d,  $J = 245.7$  Hz), 153.1 (d,  $J = 1.8$  Hz), 125.7 (d,  $J = 7.1$  Hz), 121.9, 120.9 (d,  $J = 25.5$  Hz), 119.9 (d,  $J = 8.0$  Hz), 110.8 (dd,  $J = 23.6, 2.1$  Hz), 49.8, 43.0, 40.6, 39.3 (d,  $J = 1.6$  Hz), 38.5, 32.4, 28.8, 28.6;  $^1\text{H}$  and  $^{13}\text{C}$  NMR data are consistent with previously reported.<sup>4c</sup>

Scheme 2, 4i

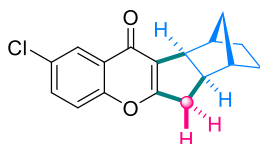

Compound **4i**: yellow solid, 44.5 mg, 78% yield, m.p. 181.5 – 183.0 °C (lit.<sup>4c</sup> m.p. 178.8 – 179.9 °C);  $^1\text{H}$ -NMR (400 MHz,  $\text{CDCl}_3$ )  $\delta$  8.16 (d,  $J = 2.4$  Hz, 1H), 7.52 (dt,  $J = 8.9, 1.9$  Hz, 1H), 7.35 (d,  $J = 8.9$  Hz, 1H), 3.23 – 3.06 (m, 2H), 2.60 – 2.48 (m, 2H), 2.36 – 2.25 (m, 1H), 2.07 (d,  $J = 4.1$  Hz, 1H), 1.64 – 1.47 (m, 2H), 1.39 (td,  $J = 10.1, 8.7, 2.5$  Hz, 1H), 1.28 – 1.18 (m, 2H), 1.13 – 1.06 (m, 1H);  $^{13}\text{C}$ -NMR ( $\text{CDCl}_3$ , 100 MHz)  $\delta$  175.1, 170.2, 155.3, 133.0, 130.8, 125.5, 125.4, 122.5, 119.7, 49.9, 43.0, 40.6, 39.3, 38.5, 32.5, 28.9, 28.6;  $^1\text{H}$  and  $^{13}\text{C}$  NMR data are consistent with previously reported.<sup>4c</sup>

Scheme 2, 4j

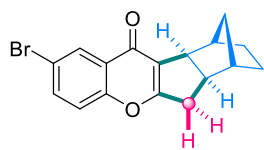

Compound **4j**: yellow solid, 49.2 mg, 74% yield, m.p. 202.0 – 203.9 °C (lit.<sup>4c</sup> m.p. 206.1 – 207.4 °C); <sup>1</sup>H-NMR (400 MHz, CDCl<sub>3</sub>) δ 8.32 (d, *J* = 2.5 Hz, 1H), 7.66 (d, *J* = 6.3 Hz, 1H), 7.29 (d, *J* = 8.8 Hz, 1H), 3.24 – 3.04 (m, 2H), 2.62 – 2.47 (m, 2H), 2.37 – 2.27 (m, 1H), 2.08 (s, 1H), 1.66 – 1.47 (m, 2H), 1.39 (t, *J* = 9.8 Hz, 1H), 1.29 – 1.21 (m, 2H), 1.11 (d, *J* = 10.4 Hz, 1H); <sup>13</sup>C-NMR (CDCl<sub>3</sub>, 100 MHz) δ 175.0, 170.2, 155.8, 135.8, 128.6, 125.9, 122.6, 120.0, 118.3, 49.9, 43.0, 40.6, 39.3, 38.5, 32.5, 28.9, 28.6; <sup>1</sup>H and <sup>13</sup>C NMR data are consistent with previously reported.<sup>4c</sup>

Scheme 2, 4k

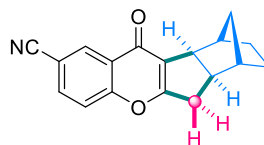

Compound **4k**: yellow solid, 22.6 mg, 41% yield, m.p. 180.6 – 182.2 °C (lit.<sup>4c</sup> m.p. 187.5 – 187.8 °C); <sup>1</sup>H-NMR (400 MHz, CDCl<sub>3</sub>) δ 8.54 (s, 1H), 7.82 (dd, *J* = 8.7, 2.1 Hz, 1H), 7.52 (d, *J* = 8.7 Hz, 1H), 3.31 – 3.04 (m, 2H), 2.68 – 2.47 (m, 2H), 2.43 – 2.30 (m, 1H), 2.10 (d, *J* = 4.1 Hz, 1H), 1.66 – 1.49 (m, 2H), 1.40 (td, *J* = 11.4, 3.0 Hz, 1H), 1.28 – 1.20 (m, 2H), 1.13 (d, *J* = 10.4 Hz, 1H); <sup>13</sup>C-NMR (CDCl<sub>3</sub>, 100 MHz) δ 174.4, 170.5, 158.7, 135.3, 131.7, 125.0, 123.5, 119.7, 117.9, 109.0, 49.8, 42.9, 40.5, 39.3, 38.5, 32.5, 28.8, 28.6; <sup>1</sup>H and <sup>13</sup>C NMR data are consistent with previously reported.<sup>4c</sup>

Scheme 2, 4l

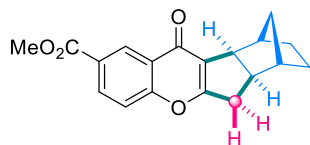

Compound **4l**: yellow solid, 54.0 mg, 87% yield, m.p. 195.8 – 197.1 °C; <sup>1</sup>H-NMR (400 MHz, CDCl<sub>3</sub>) δ 8.93 – 8.85 (m, 1H), 8.24 (dd, *J* = 8.8, 2.2 Hz, 1H), 7.44 (d, *J* = 8.7 Hz, 1H), 3.94 (s, 3H), 3.26 – 3.08 (m, 2H), 2.62 – 2.52 (m, 2H), 2.39 – 2.29 (m, 1H), 2.08 (d, *J* = 4.1 Hz, 1H), 1.65 – 1.49 (m, 2H), 1.44 – 1.37 (m, 1H), 1.26 – 1.21 (m, 2H), 1.15 – 1.09 (m, 1H); <sup>13</sup>C-NMR (CDCl<sub>3</sub>, 100 MHz) δ 175.7, 170.1,

166.1, 159.5, 133.6, 128.5, 126.9, 124.2, 123.0, 118.5, 52.5, 49.9, 43.0, 40.6, 39.3, 38.5, 32.5, 28.9, 28.6; HRMS (ESI-TOF): calcd. for  $[C_{19}H_{19}O_4]^+$   $[M + H]^+$  311.1278; found 311.1277.

Scheme 2, 4m

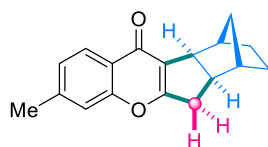

Compound **4m**: yellow solid, 46.5 mg, 87% yield, m.p. 144.6 – 146.4 °C (lit.<sup>4c</sup> m.p. 146.6 – 148.1 °C); <sup>1</sup>H-NMR (400 MHz, CDCl<sub>3</sub>) δ 8.08 (d, *J* = 8.0 Hz, 1H), 7.15 (d, *J* = 9.0 Hz, 2H), 3.20 – 3.00 (m, 2H), 2.60 – 2.47 (m, 2H), 2.43 (s, 3H), 2.33 – 2.22 (m, 1H), 2.04 (d, *J* = 4.1 Hz, 1H), 1.63 – 1.46 (m, 2H), 1.43 – 1.34 (m, 1H), 1.28 – 1.17 (m, 2H), 1.08 (d, *J* = 10.3 Hz, 1H); <sup>13</sup>C-NMR (CDCl<sub>3</sub>, 100 MHz) δ 176.4, 169.5, 157.1, 144.0, 126.3, 125.6, 122.2, 122.1, 117.8, 49.9, 43.0, 40.5, 39.3, 38.5, 32.4, 28.9, 28.7, 21.8; <sup>1</sup>H and <sup>13</sup>C NMR data are consistent with previously reported.<sup>4c</sup>

Scheme 2, 4n

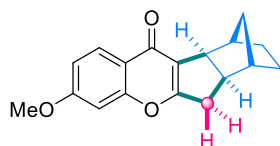

Compound **4n**: yellow solid, 47.4 mg, 84% yield, m.p. 128.8 – 130.5 °C (lit.<sup>4c</sup> m.p. 130.2 – 132.3 °C); <sup>1</sup>H-NMR (400 MHz, CDCl<sub>3</sub>) δ 8.08 (d, *J* = 8.8 Hz, 1H), 6.89 (d, *J* = 8.6 Hz, 1H), 6.77 (s, 1H), 3.84 (s, 3H), 3.16 – 3.00 (m, 2H), 2.58 – 2.41 (m, 2H), 2.32 – 2.22 (m, 1H), 2.03 (d, *J* = 4.1 Hz, 1H), 1.61 – 1.44 (m, 2H), 1.37 (t, *J* = 10.4 Hz, 1H), 1.28 – 1.15 (m, 2H), 1.06 (d, *J* = 10.3 Hz, 1H); <sup>13</sup>C-NMR (CDCl<sub>3</sub>, 100 MHz) δ 176.0, 169.2, 163.4, 158.7, 127.1, 122.1, 118.3, 113.7, 100.5, 55.8, 49.8, 43.0, 40.6, 39.3, 38.4, 32.4, 28.9, 28.7; <sup>1</sup>H and <sup>13</sup>C NMR data are consistent with previously reported.<sup>4c</sup>

Scheme 2, 4o

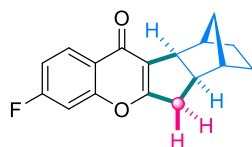

Compound **4o**: yellow solid, 45.2 mg, 84% yield, m.p. 125.5 – 126.7 °C (lit.<sup>4c</sup> m.p. 124.6 – 126.1 °C); <sup>1</sup>H-NMR (400 MHz, CDCl<sub>3</sub>) δ 8.21 (dd, *J* = 9.2, 6.4 Hz, 1H), 7.13 – 6.99 (m, 2H), 3.21 – 3.05 (m, 2H),

2.60 – 2.47 (m, 2H), 2.37 – 2.26 (m, 1H), 2.06 (d,  $J = 4.1$  Hz, 1H), 1.65 – 1.45 (m, 2H), 1.44 – 1.33 (m, 1H), 1.29 – 1.16 (m, 2H), 1.10 (d,  $J = 10.4$  Hz, 1H);  $^{13}\text{C}$ -NMR ( $\text{CDCl}_3$ , 100 MHz)  $\delta$  175.5, 170.0, 165.1 (d,  $J = 253.4$  Hz), 157.9 (d,  $J = 13.0$  Hz), 128.2 (d,  $J = 10.6$  Hz), 122.5, 121.3 (d,  $J = 2.4$  Hz), 113.4 (d,  $J = 22.6$  Hz), 104.7 (d,  $J = 25.4$  Hz), 49.8, 42.9, 40.6, 39.3, 38.4, 32.4, 28.9, 28.6;  $^1\text{H}$  and  $^{13}\text{C}$  NMR data are consistent with previously reported.<sup>4c</sup>

Scheme 2, 4p

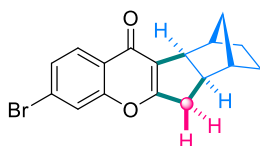

Compound **4p**: yellow solid, 51.6 mg, 78% yield, m.p. 180.7 – 182.0 °C (lit.<sup>4c</sup> m.p. 182.4 – 183.8 °C);  $^1\text{H}$ -NMR (400 MHz,  $\text{CDCl}_3$ )  $\delta$  8.04 (d,  $J = 8.4$  Hz, 1H), 7.55 (s, 1H), 7.44 (d,  $J = 8.4$  Hz, 1H), 3.21 – 2.96 (m, 2H), 2.59 – 2.45 (m, 2H), 2.36 – 2.24 (m, 1H), 2.05 (d,  $J = 4.1$  Hz, 1H), 1.64 – 1.44 (m, 2H), 1.37 (t,  $J = 10.7$  Hz, 1H), 1.27 – 1.15 (m, 2H), 1.09 (d,  $J = 10.4$  Hz, 1H);  $^{13}\text{C}$ -NMR ( $\text{CDCl}_3$ , 100 MHz)  $\delta$  175.6, 169.9, 157.0, 128.4, 127.3, 126.9, 123.4, 122.7, 121.1, 49.8, 42.9, 40.5, 39.3, 38.4, 32.4, 28.8, 28.6;  $^1\text{H}$  and  $^{13}\text{C}$  NMR data are consistent with previously reported.<sup>4c</sup>

Scheme 2, 4q

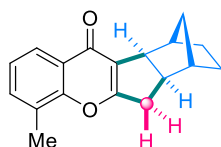

Compound **4q**: yellow solid, 48.9 mg, 92% yield, m.p. 126.3 – 128.0 °C (lit.<sup>4c</sup> m.p. 125.1 – 127.2 °C);  $^1\text{H}$ -NMR (400 MHz,  $\text{CDCl}_3$ )  $\delta$  8.04 (d,  $J = 7.9$  Hz, 1H), 7.39 (d,  $J = 7.2$  Hz, 1H), 7.21 (t,  $J = 7.7$  Hz, 1H), 3.21 – 3.06 (m, 2H), 2.59 – 2.50 (m, 2H), 2.42 (s, 3H), 2.33 – 2.23 (m, 1H), 2.05 (d,  $J = 4.0$  Hz, 1H), 1.61 – 1.46 (m, 2H), 1.42 – 1.34 (m, 1H), 1.29 – 1.18 (m, 2H), 1.07 (d,  $J = 10.4$  Hz, 1H);  $^{13}\text{C}$ -NMR ( $\text{CDCl}_3$ , 100 MHz)  $\delta$  176.7, 169.7, 155.5, 133.8, 127.3, 124.3, 124.2, 123.4, 122.1, 49.9, 43.0, 40.5, 39.3, 38.5, 32.4, 28.8, 28.6, 15.7;  $^1\text{H}$  and  $^{13}\text{C}$  NMR data are consistent with previously reported.<sup>4c</sup>

**Scheme 2, 4r**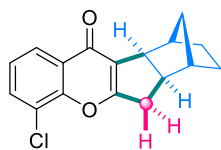

Compound **4r**: yellow solid, 49.0 mg, 86% yield, m.p. 142.9 – 144.1 °C (lit.<sup>4c</sup> m.p. 142.4 – 144.5 °C); <sup>1</sup>H-NMR (400 MHz, CDCl<sub>3</sub>) δ 8.11 (d, *J* = 8.0 Hz, 1H), 7.64 (d, *J* = 7.7 Hz, 1H), 7.28 (t, *J* = 7.8 Hz, 1H), 3.22 (dd, *J* = 18.9, 10.3 Hz, 1H), 3.11 (d, *J* = 7.7 Hz, 1H), 2.67 – 2.51 (m, 2H), 2.39 – 2.28 (m, 1H), 2.08 (d, *J* = 4.1 Hz, 1H), 1.65 – 1.47 (m, 2H), 1.44 – 1.35 (m, 1H), 1.30 – 1.19 (m, 2H), 1.11 (d, *J* = 10.4 Hz, 1H); <sup>13</sup>C-NMR (CDCl<sub>3</sub>, 100 MHz) δ 175.5, 169.9, 152.6, 133.2, 125.9, 124.9, 124.6, 122.9, 122.7, 49.8, 43.0, 40.6, 39.2, 38.5, 32.4, 28.8, 28.6.; <sup>1</sup>H and <sup>13</sup>C NMR data are consistent with previously reported.<sup>4c</sup>

**Scheme 2, 4s**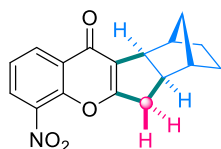

Compound **4s**: yellow solid, 29.8 mg, 50% yield, m.p. 158.9 – 160.3 °C (lit.<sup>4c</sup> m.p. 160.4 – 161.4 °C); <sup>1</sup>H-NMR (400 MHz, CDCl<sub>3</sub>) δ 8.50 (dd, *J* = 7.9, 1.8 Hz, 1H), 8.22 (dd, *J* = 7.9, 1.7 Hz, 1H), 7.48 (t, *J* = 7.9 Hz, 1H), 3.24 (dd, *J* = 19.1, 10.2 Hz, 1H), 3.13 (d, *J* = 7.7 Hz, 1H), 2.70 – 2.53 (m, 2H), 2.40 – 2.33 (m, 1H), 1.67 – 1.50 (m, 2H), 1.45 – 1.37 (m, 1H), 1.29 – 1.22 (m, 2H), 1.14 (dt, *J* = 10.4, 1.5 Hz, 1H); <sup>13</sup>C-NMR (CDCl<sub>3</sub>, 100 MHz) δ 174.2, 170.2, 149.1, 139.2, 131.8, 128.9, 126.4, 124.1, 123.5, 49.8, 43.0, 40.6, 39.3, 38.5, 32.5, 28.9, 28.6.; <sup>1</sup>H and <sup>13</sup>C NMR data are consistent with previously reported.<sup>4c</sup>

**Scheme 2, 4t**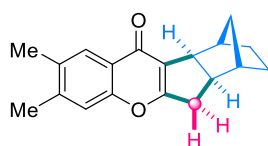

Compound **4t**: yellow solid, 47.5 mg, 85% yield, m.p. 168.0 – 169.2 °C (lit.<sup>4c</sup> m.p. 167.0 – 169.0 °C); <sup>1</sup>H-NMR (400 MHz, CDCl<sub>3</sub>) δ 7.91 (s, 1H), 7.12 (s, 1H), 3.16 – 3.03 (m, 2H), 2.56 – 2.45 (m, 2H), 2.31 (d, *J* = 7.7 Hz, 7H), 2.03 (d, *J* = 4.1 Hz, 1H), 1.62 – 1.45 (m, 2H), 1.42 – 1.34 (m, 1H), 1.27 – 1.17 (m,

2H), 1.06 (d,  $J = 10.3$  Hz, 1H);  $^{13}\text{C}$ -NMR ( $\text{CDCl}_3$ , 100 MHz)  $\delta$  176.4, 169.3, 155.5, 143.0, 133.9, 125.5, 122.2, 122.0, 118.1, 49.9, 43.0, 40.5, 39.3, 38.4, 32.4, 28.9, 28.7, 20.4, 19.3;  $^1\text{H}$  and  $^{13}\text{C}$  NMR data are consistent with previously reported.<sup>4c</sup>

**Scheme 2, 4u**

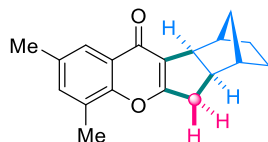

Compound **4u**: yellow solid, 44.6 mg, 80% yield, m.p. 214.8 – 215.5 °C (lit.<sup>4c</sup> m.p. 212.1 – 213.6 °C);  $^1\text{H}$ -NMR (400 MHz,  $\text{CDCl}_3$ )  $\delta$  7.82 (s, 1H), 7.21 (s, 1H), 3.20 – 3.04 (m, 2H), 2.57 – 2.48 (m, 2H), 2.37 (d,  $J = 7.5$  Hz, 6H), 2.31 – 2.24 (m, 1H), 2.04 (d,  $J = 3.9$  Hz, 1H), 1.62 – 1.45 (m, 2H), 1.42 – 1.34 (m, 1H), 1.27 – 1.17 (m, 2H), 1.06 (d,  $J = 10.3$  Hz, 1H);  $^{13}\text{C}$ -NMR ( $\text{CDCl}_3$ , 100 MHz)  $\delta$  176.7, 169.4, 153.8, 135.1, 134.0, 126.9, 123.9, 122.8, 121.9, 49.9, 43.0, 40.6, 39.3, 38.5, 32.4, 28.9, 28.6, 20.9, 15.6;  $^1\text{H}$  and  $^{13}\text{C}$  NMR data are consistent with previously reported.<sup>4c</sup>

**Scheme 2, 4v**

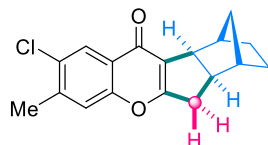

Compound **4v**: yellow solid, 45.8 mg, 76% yield, m.p. 184.3 – 185.8 °C (lit.<sup>4c</sup> m.p. 184.5 – 186.3 °C);  $^1\text{H}$ -NMR (400 MHz,  $\text{CDCl}_3$ )  $\delta$  8.12 (s, 1H), 7.25 (s, 1H), 3.23 – 3.01 (m, 2H), 2.61 – 2.39 (m, 5H), 2.30 (d,  $J = 9.2$  Hz, 1H), 2.05 (s, 1H), 1.63 – 1.46 (m, 2H), 1.37 (t,  $J = 10.5$  Hz, 1H), 1.23 (d,  $J = 10.5$  Hz, 2H), 1.08 (d,  $J = 10.5$  Hz, 1H);  $^{13}\text{C}$ -NMR ( $\text{CDCl}_3$ , 100 MHz)  $\delta$  175.2, 169.9, 155.2, 141.8, 131.4, 125.6, 123.6, 122.3, 119.8, 49.9, 43.0, 40.6, 39.3, 38.5, 32.4, 28.9, 28.6, 20.8;  $^1\text{H}$  and  $^{13}\text{C}$  NMR data are consistent with previously reported.<sup>4c</sup>

**Scheme 2, 4w**

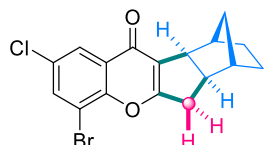

Compound **4w**: yellow solid, 53.9 mg, 74% yield, m.p. 143.4 – 145.1 °C (lit.<sup>4c</sup> m.p. 144.0 – 146.3 °C); <sup>1</sup>H-NMR (400 MHz, CDCl<sub>3</sub>) δ 8.11 (d, *J* = 2.5 Hz, 1H), 7.78 (d, *J* = 2.4 Hz, 1H), 3.22 (dd, *J* = 19.0, 10.1 Hz, 1H), 3.10 (d, *J* = 7.7 Hz, 1H), 2.67 – 2.50 (m, 2H), 2.39 – 2.30 (m, 1H), 2.09 (d, *J* = 4.1 Hz, 1H), 1.65 – 1.48 (m, 2H), 1.39 (t, *J* = 9.9 Hz, 1H), 1.29 – 1.19 (m, 2H), 1.12 (d, *J* = 10.5 Hz, 1H); <sup>13</sup>C-NMR (CDCl<sub>3</sub>, 100 MHz) δ 174.3, 170.4, 152.2, 136.0, 130.9, 126.3, 124.9, 122.7, 112.5, 49.8, 43.0, 40.6, 39.3, 38.5, 32.5, 28.8, 28.6; <sup>1</sup>H and <sup>13</sup>C NMR data are consistent with previously reported.<sup>4c</sup>

Scheme 2, 4x

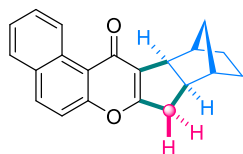

Compound **4x**: yellow solid, 35.5 mg, 55% yield, m.p. 205.2 – 206.2 °C (lit.<sup>4c</sup> m.p. 202.1 – 203.3 °C); <sup>1</sup>H-NMR (400 MHz, CDCl<sub>3</sub>) δ 10.14 (d, *J* = 8.7 Hz, 1H), 7.97 (d, *J* = 9.0 Hz, 1H), 7.85 (d, *J* = 8.0 Hz, 1H), 7.71 (t, *J* = 8.0 Hz, 1H), 7.56 (t, *J* = 7.5 Hz, 1H), 7.42 (d, *J* = 9.0 Hz, 1H), 3.21 – 3.10 (m, 2H), 2.68 – 2.50 (m, 2H), 2.37 – 2.27 (m, 1H), 2.07 (d, *J* = 4.1 Hz, 1H), 1.68 – 1.47 (m, 2H), 1.48 – 1.38 (m, 1H), 1.29 – 1.18 (m, 2H), 1.14 – 1.07 (m, 1H); <sup>13</sup>C-NMR (CDCl<sub>3</sub>, 100 MHz) δ 178.7, 166.9, 158.1, 134.5, 131.1, 130.7, 128.9, 128.1, 127.2, 126.3, 125.1, 117.8, 117.4, 50.2, 43.0, 41.0, 39.3, 38.0, 32.5, 28.9, 28.7; <sup>1</sup>H and <sup>13</sup>C NMR data are consistent with previously reported.<sup>4c</sup>

Scheme 2, 4y

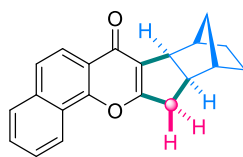

Compound **4y**: yellow solid, 50.5 mg, 84% yield, m.p. 181.9 – 183.7 °C (lit.<sup>4c</sup> m.p. 188.4 – 190.1 °C); <sup>1</sup>H-NMR (400 MHz, CDCl<sub>3</sub>) δ 8.43 (d, *J* = 8.9 Hz, 1H), 8.17 (d, *J* = 8.7 Hz, 1H), 7.88 (dd, *J* = 7.5, 1.8 Hz, 1H), 7.71 (d, *J* = 8.7 Hz, 1H), 7.62 (pd, *J* = 7.1, 1.5 Hz, 2H), 3.26 (dd, *J* = 18.4, 10.1 Hz, 1H), 3.17 (d, *J* = 7.7 Hz, 1H), 2.73 – 2.57 (m, 2H), 2.41 – 2.30 (m, 1H), 2.10 (d, *J* = 4.2 Hz, 1H), 1.68 – 1.50 (m, 2H), 1.47 – 1.39 (m, 1H), 1.31 – 1.21 (m, 2H), 1.12 (d, *J* = 10.4 Hz, 1H); <sup>13</sup>C-NMR (CDCl<sub>3</sub>, 100 MHz) δ 176.4, 168.9, 154.2, 135.6, 128.9, 128.1, 126.9, 124.9, 124.2, 123.7, 122.2, 121.2, 120.6, 50.0, 43.0, 40.8, 39.3, 38.4, 32.5, 28.9, 28.7; <sup>1</sup>H and <sup>13</sup>C NMR data are consistent with previously reported.<sup>4c</sup>



Fig. 1, 4z

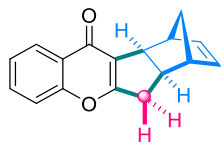

Compound **4z**: yellow solid, 30.1 mg, 60% yield, m.p. 140.0 – 142.0 °C;  $^1\text{H-NMR}$  (400 MHz,  $\text{CDCl}_3$ )  $\delta$  8.22 (dd,  $J = 8.0, 1.8$  Hz, 1H), 7.59 (ddd,  $J = 8.7, 7.1, 1.8$  Hz, 1H), 7.43 – 7.33 (m, 2H), 6.24 (dd,  $J = 5.8, 3.0$  Hz, 1H), 6.08 (dd,  $J = 5.8, 3.0$  Hz, 1H), 3.22 – 3.00 (m, 3H), 2.66 (s, 1H), 2.54 (ddd,  $J = 18.8, 3.8, 2.3$  Hz, 1H), 2.37 – 2.27 (m, 1H), 1.39 (dt,  $J = 9.2, 1.7$  Hz, 1H), 1.31 (d,  $J = 8.9$  Hz, 1H);  $^{13}\text{C-NMR}$  ( $\text{CDCl}_3$ , 100 MHz)  $\delta$  176.2, 170.2, 157.0, 138.2, 136.4, 132.9, 125.9, 124.9, 124.5, 122.4, 118.0, 47.7, 47.1, 44.4, 41.8, 37.6, 36.4; HRMS (ESI-TOF): calcd. for  $[\text{C}_{17}\text{H}_{15}\text{O}_2]^+$   $[\text{M} + \text{H}]^+$  251.1067; found 251.1064.

Fig. 1, 4aa

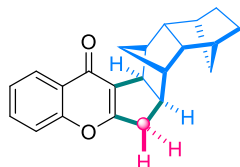

Compound **4aa**: yellow solid, 57.0 mg, 90% yield, m.p. 183.0 – 184.0 °C (lit.<sup>4c</sup> m.p. 180.2 – 182.1 °C);  $^1\text{H-NMR}$  (400 MHz,  $\text{CDCl}_3$ )  $\delta$  8.20 (dd,  $J = 8.0, 1.7$  Hz, 1H), 7.61 – 7.54 (m, 1H), 7.36 (dd,  $J = 16.8, 8.2$  Hz, 2H), 3.49 (d,  $J = 7.3$  Hz, 1H), 3.14 (dd,  $J = 18.5, 10.1$  Hz, 1H), 2.70 – 2.59 (m, 2H), 2.44 (dt,  $J = 18.6, 3.0$  Hz, 1H), 2.38 (d,  $J = 3.0$  Hz, 1H), 2.17 (d,  $J = 3.1$  Hz, 1H), 2.09 (d,  $J = 4.8$  Hz, 1H), 1.79 (dd,  $J = 10.0, 4.7$  Hz, 1H), 1.72 – 1.64 (m, 2H), 1.52 – 1.42 (m, 2H), 1.28 (d,  $J = 10.2$  Hz, 1H), 1.10 (d,  $J = 10.3$  Hz, 1H), 0.99 (t,  $J = 8.6$  Hz, 3H);  $^{13}\text{C-NMR}$  ( $\text{CDCl}_3$ , 100 MHz)  $\delta$  176.1, 169.5, 156.9, 132.8, 125.8, 124.8, 124.4, 122.4, 117.9, 50.1, 50.1, 48.2, 44.8, 44.0, 38.9, 36.4, 35.6, 35.4, 35.2, 31.4, 31.4;  $^1\text{H}$  and  $^{13}\text{C}$  NMR data are consistent with previously reported.<sup>4c</sup>

Fig. 1, 4ab

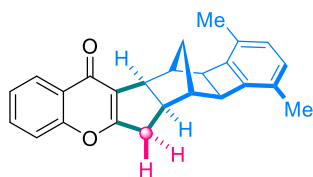

Compound **4ab**: yellow solid, 64.4 mg, 91% yield, m.p. 233.6 – 234.4 °C (lit.<sup>4c</sup> m.p. 235.0 – 236.1 °C);  $^1\text{H-NMR}$  (400 MHz,  $\text{CDCl}_3$ )  $\delta$  8.25 (dd,  $J = 8.0, 1.7$  Hz, 1H), 7.61 (ddd,  $J = 8.7, 7.0, 1.7$  Hz, 1H), 7.47 –

7.32 (m, 2H), 6.90 (s, 2H), 3.40 (d,  $J = 3.8$  Hz, 1H), 3.31 – 3.14 (m, 3H), 2.75 – 2.58 (m, 2H), 2.41 – 2.33 (m, 1H), 2.25 – 2.10 (m, 7H), 1.03 (d,  $J = 11.7$  Hz, 1H), 0.80 (d,  $J = 11.2$  Hz, 1H);  $^{13}\text{C}$ -NMR ( $\text{CDCl}_3$ , 100 MHz)  $\delta$  176.4, 169.6, 157.0, 144.0, 143.3, 133.0, 129.7, 129.1, 128.7, 128.5, 125.9, 125.0, 124.4, 122.1, 118.0, 48.6, 48.6, 47.8, 42.4, 39.2, 38.9, 38.2, 26.7, 16.4, 16.3;  $^1\text{H}$  and  $^{13}\text{C}$  NMR data are consistent with previously reported.<sup>4c</sup>

Fig. 1, 4ac

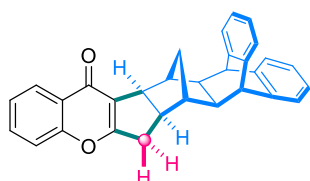

Compound **4ac**: white solid, 66.1 mg, 77% yield, m.p. 294.6 – 295.2 °C;  $^1\text{H}$ -NMR (400 MHz,  $\text{CDCl}_3$ )  $\delta$  8.21 (d,  $J = 7.5$  Hz, 1H), 7.60 – 7.54 (m, 1H), 7.35 (t,  $J = 8.0$  Hz, 2H), 7.29 – 7.25 (m, 2H), 7.20 – 7.13 (m, 2H), 7.13 – 7.04 (m, 4H), 4.37 (d,  $J = 2.8$  Hz, 1H), 4.27 (d,  $J = 2.8$  Hz, 1H), 3.13 – 2.96 (m, 2H), 2.47 – 2.32 (m, 2H), 2.22 – 2.11 (m, 2H), 1.99 – 1.93 (m, 1H), 1.88 (s, 1H), 0.45 (d,  $J = 11.6$  Hz, 1H), -0.48 (d,  $J = 11.6$  Hz, 1H);  $^{13}\text{C}$ -NMR ( $\text{CDCl}_3$ , 100 MHz)  $\delta$  176.3, 170.0, 156.9, 144.7, 144.5, 142.3, 142.0, 132.9, 126.2, 126.0, 125.8, 125.8, 125.6, 124.9, 124.5, 124.3, 124.2, 123.5, 123.2, 121.4, 117.9, 51.2, 49.1, 48.5, 48.4, 48.2, 46.2, 42.5, 41.6, 37.7, 27.1;  $^1\text{H}$  and  $^{13}\text{C}$  NMR data are consistent with previously reported.<sup>4c</sup>

Scheme 3, 4ad

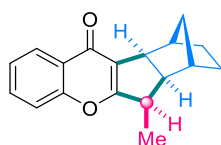

Compound **4ad**: yellow solid, 32.9 mg, 62% yield, m.p. 142.6 – 144.3 °C;  $^1\text{H}$ -NMR (400 MHz,  $\text{CDCl}_3$ )  $\delta$  8.22 (dd,  $J = 8.0, 1.8$  Hz, 1H), 7.59 (ddd,  $J = 8.6, 7.1, 1.8$  Hz, 1H), 7.43 (dd,  $J = 8.5, 1.2$  Hz, 1H), 7.36 (ddd,  $J = 8.2, 7.1, 1.2$  Hz, 1H), 3.42 (dq,  $J = 10.1, 7.5$  Hz, 1H), 3.18 (d,  $J = 7.7$  Hz, 1H), 2.62 – 2.57 (m, 1H), 2.33 – 2.19 (m, 2H), 1.66 – 1.49 (m, 2H), 1.42 – 1.35 (m, 1H), 1.31 (d,  $J = 7.5$  Hz, 3H), 1.19 – 1.12 (m, 2H), 1.07 (dt,  $J = 10.0, 1.7$  Hz, 1H);  $^{13}\text{C}$ -NMR ( $\text{CDCl}_3$ , 100 MHz)  $\delta$  176.6, 172.5, 157.0, 132.8, 125.9, 124.8, 124.6, 120.8, 118.1, 49.7, 44.4, 40.9, 37.6, 37.1, 34.0, 29.4, 28.6, 12.0; HRMS (ESI-TOF): calcd. for  $[\text{C}_{18}\text{H}_{19}\text{O}_2]^+$   $[\text{M} + \text{H}]^+$  267.1380; found 267.1377.

Scheme 3, 4ae

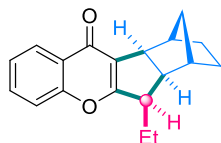

Compound **4ae**: yellow solid, 35.0 mg, 62% yield, m.p. 99.8 – 101.6 °C;  $^1\text{H-NMR}$  (400 MHz,  $\text{CDCl}_3$ )  $\delta$  8.22 (dd,  $J = 7.9, 1.7$  Hz, 1H), 7.59 (ddd,  $J = 8.7, 7.1, 1.8$  Hz, 1H), 7.44 – 7.40 (m, 1H), 7.40 – 7.32 (m, 1H), 3.25 – 3.10 (m, 2H), 2.60 (d,  $J = 3.8$  Hz, 1H), 2.36 – 2.26 (m, 2H), 1.99 – 1.89 (m, 1H), 1.70 – 1.53 (m, 3H), 1.43 – 1.35 (m, 1H), 1.18 (t,  $J = 7.4$  Hz, 5H), 1.09 – 1.03 (m, 1H);  $^{13}\text{C-NMR}$  ( $\text{CDCl}_3$ , 100 MHz)  $\delta$  176.6, 172.0, 157.0, 132.8, 125.9, 124.9, 124.6, 121.0, 118.1, 49.4, 48.5, 43.7, 37.8, 36.9, 34.0, 29.6, 28.5, 20.3, 13.9; HRMS (ESI-TOF): calcd. for  $[\text{C}_{19}\text{H}_{21}\text{O}_2]^+$   $[\text{M} + \text{H}]^+$  281.1536; found 281.1537.

Scheme 3, 4af

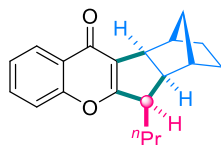

Compound **4af**: yellow solid, 18.0 mg, 31% yield, m.p. 115.3 – 116.8 °C;  $^1\text{H-NMR}$  (400 MHz,  $\text{CDCl}_3$ )  $\delta$  8.22 (dd,  $J = 7.9, 1.8$  Hz, 1H), 7.59 (ddd,  $J = 8.7, 7.0, 1.8$  Hz, 1H), 7.42 (d,  $J = 8.4$  Hz, 1H), 7.36 (t,  $J = 7.5$  Hz, 1H), 3.26 (td,  $J = 9.4, 4.4$  Hz, 1H), 3.18 (d,  $J = 7.6$  Hz, 1H), 2.61 (d,  $J = 3.9$  Hz, 1H), 2.33 – 2.22 (m, 2H), 1.70 – 1.47 (m, 5H), 1.44 – 1.35 (m, 1H), 1.21 – 1.13 (m, 2H), 1.10 – 1.00 (m, 4H);  $^{13}\text{C-NMR}$  ( $\text{CDCl}_3$ , 100 MHz)  $\delta$  176.5, 172.0, 157.0, 132.8, 125.9, 124.8, 124.6, 121.0, 118.1, 49.5, 46.5, 43.8, 37.7, 37.0, 34.0, 29.6, 29.3, 28.5, 22.4, 14.5; HRMS (ESI-TOF): calcd. for  $[\text{C}_{20}\text{H}_{23}\text{O}_2]^+$   $[\text{M} + \text{H}]^+$  295.1693; found 295.1692.

Scheme 3, 4ag

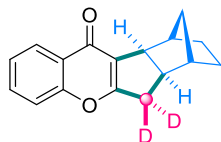

Compound **4ag**: yellow solid, 45.8 mg, 90% yield, 92% D, m.p. 139.7 – 141.0 °C;  $^1\text{H-NMR}$  (400 MHz,  $\text{CDCl}_3$ )  $\delta$  8.22 (dd,  $J = 8.0, 1.8$  Hz, 1H), 7.59 (ddd,  $J = 8.6, 7.1, 1.8$  Hz, 1H), 7.43 – 7.30 (m, 2H), 3.11

(d,  $J = 7.8$  Hz, 1H), 2.56 (d,  $J = 4.1$  Hz, 1H), 2.29 (d,  $J = 7.7$  Hz, 1H), 2.06 (d,  $J = 4.2$  Hz, 1H), 1.64 – 1.47 (m, 2H), 1.44 – 1.36 (m, 1H), 1.28 – 1.19 (m, 2H), 1.09 (dt,  $J = 10.3, 1.6$  Hz, 1H);  $^{13}\text{C}$ -NMR ( $\text{CDCl}_3$ , 100 MHz)  $\delta$  176.4, 169.8, 157.0, 132.8, 125.9, 124.8, 124.4, 122.5, 118.0, 49.9, 42.9, 40.4, 39.3, 38.6 – 36.9 (m), 32.4, 28.9, 28.7; HRMS (ESI-TOF): calcd. for  $[\text{C}_{17}\text{H}_{15}\text{D}_2\text{O}_2]^+ [\text{M} + \text{H}]^+$  255.1349; found 255.1345.

**Scheme 3, 4ah**

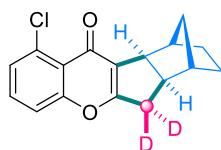

Compound **4ah**: yellow solid, 40.4 mg, 70% yield, 76% D, m.p. 173.0 – 174.2 °C;  $^1\text{H}$ -NMR (400 MHz,  $\text{CDCl}_3$ )  $\delta$  7.43 (t,  $J = 8.1$  Hz, 1H), 7.31 (td,  $J = 7.8, 1.3$  Hz, 2H), 3.06 (d,  $J = 7.7$  Hz, 1H), 2.62 – 2.47 (m, 1H), 2.28 (d,  $J = 7.7$  Hz, 1H), 2.05 (d,  $J = 4.0$  Hz, 1H), 1.65 – 1.45 (m, 2H), 1.41 – 1.32 (m, 1H), 1.27 – 1.17 (m, 2H), 1.09 (dt,  $J = 10.3, 1.5$  Hz, 1H);  $^{13}\text{C}$ -NMR ( $\text{CDCl}_3$ , 100 MHz)  $\delta$  175.4, 168.1, 158.8, 133.8, 131.9, 128.1, 123.6, 121.4, 117.4, 50.1, 42.8, 40.5, 39.2, 38.4 – 37.3 (m), 32.5, 28.8, 28.6; HRMS (ESI-TOF): calcd. for  $[\text{C}_{17}\text{H}_{14}\text{D}_2\text{ClO}_2]^+ [\text{M} + \text{H}]^+$  289.0959; found 289.0957.

**Scheme 3, 4ai**

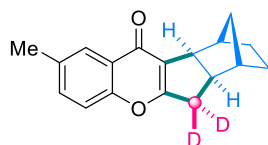

Compound **4ai**: yellow solid, 42.0 mg, 78% yield, 86% D, m.p. 142.1 – 144.0 °C;  $^1\text{H}$ -NMR (400 MHz,  $\text{CDCl}_3$ )  $\delta$  7.99 (d,  $J = 1.6$  Hz, 1H), 7.39 (dd,  $J = 8.5, 2.3$  Hz, 1H), 7.28 (d,  $J = 8.5$  Hz, 1H), 3.10 (d,  $J = 7.6$  Hz, 1H), 2.56 (d,  $J = 4.1$  Hz, 1H), 2.42 (s, 3H), 2.28 (d,  $J = 7.7$  Hz, 1H), 2.05 (d,  $J = 4.1$  Hz, 1H), 1.64 – 1.47 (m, 2H), 1.43 – 1.36 (m, 1H), 1.26 – 1.15 (m, 2H), 1.08 (dt,  $J = 10.3, 1.5$  Hz, 1H);  $^{13}\text{C}$ -NMR ( $\text{CDCl}_3$ , 100 MHz)  $\delta$  176.5, 169.7, 155.3, 134.7, 134.0, 125.3, 124.1, 122.3, 117.7, 49.9, 42.9, 40.4, 39.3, 38.7 – 37.2 (m), 32.4, 28.9, 28.7, 21.0; HRMS (ESI-TOF): calcd. for  $[\text{C}_{18}\text{H}_{17}\text{D}_2\text{O}_2]^+ [\text{M} + \text{H}]^+$  269.1505; found 269.1503.

Scheme 3, 4aj

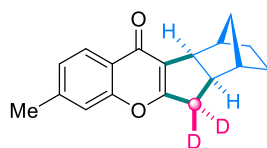

Compound **4aj**: yellow solid, 44.9 mg, 84% yield, 89% D, m.p. 147.3 – 148.4 °C;  $^1\text{H-NMR}$  (400 MHz,  $\text{CDCl}_3$ )  $\delta$  8.08 (d,  $J = 8.0$  Hz, 1H), 7.16 (d,  $J = 8.7$  Hz, 2H), 3.09 (d,  $J = 7.6$  Hz, 1H), 2.57 – 2.48 (m, 1H), 2.44 (s, 3H), 2.27 (d,  $J = 7.7$  Hz, 1H), 2.05 (d,  $J = 4.1$  Hz, 1H), 1.63 – 1.47 (m, 2H), 1.43 – 1.35 (m, 1H), 1.26 – 1.17 (m, 2H), 1.08 (dt,  $J = 10.3, 1.6$  Hz, 1H);  $^{13}\text{C-NMR}$  ( $\text{CDCl}_3$ , 100 MHz)  $\delta$  176.4, 169.5, 157.2, 144.0, 126.3, 125.7, 122.3, 122.2, 117.8, 49.9, 42.9, 40.6, 39.3, 38.7 – 36.8 (m), 32.4, 28.9, 28.7, 21.8; HRMS (ESI-TOF): calcd. for  $[\text{C}_{18}\text{H}_{17}\text{D}_2\text{O}_2]^+$   $[\text{M} + \text{H}]^+$  269.1505; found 269.1505.

Scheme 3, 4ak

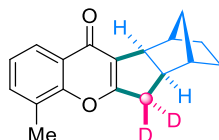

Compound **4ak**: yellow solid, 43.5 mg, 81% yield, 90% D, m.p. 121.9 – 123.8 °C;  $^1\text{H-NMR}$  (400 MHz,  $\text{CDCl}_3$ )  $\delta$  8.10 (dd,  $J = 8.0, 1.8$  Hz, 1H), 7.55 – 7.38 (m, 1H), 7.31 – 7.27 (m, 1H), 3.15 (d,  $J = 7.7$  Hz, 1H), 2.61 (d,  $J = 4.1$  Hz, 1H), 2.48 (s, 3H), 2.34 (d,  $J = 7.7$  Hz, 1H), 2.11 (d,  $J = 4.1$  Hz, 1H), 1.69 – 1.52 (m, 2H), 1.48 – 1.40 (m, 1H), 1.32 – 1.23 (m, 2H), 1.14 (dd,  $J = 10.3, 1.5$  Hz, 1H);  $^{13}\text{C-NMR}$  ( $\text{CDCl}_3$ , 100 MHz)  $\delta$  176.7, 169.5, 155.5, 133.9, 127.3, 124.3, 124.3, 123.5, 122.2, 49.9, 42.9, 40.4, 39.3, 38.8 – 37.0 (m), 32.4, 28.9, 28.7, 15.8; HRMS (ESI-TOF): calcd. for  $[\text{C}_{18}\text{H}_{17}\text{D}_2\text{O}_2]^+$   $[\text{M} + \text{H}]^+$  269.1505; found 269.1503.

Scheme 4, 6a

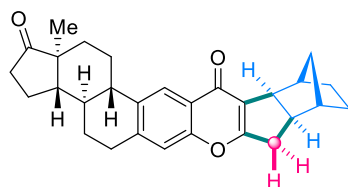

Compound **6a**: white solid, 80.0 mg, 93% yield, m.p. 274.6 – 275.7 °C;  $^1\text{H-NMR}$  (400 MHz,  $\text{CDCl}_3$ )  $\delta$  8.08 (d,  $J = 4.2$  Hz, 1H), 7.10 (d,  $J = 2.4$  Hz, 1H), 3.19 – 3.07 (m, 2H), 3.05 – 2.91 (m, 2H), 2.64 – 2.44 (m, 4H), 2.36 – 2.24 (m, 2H), 2.20 – 1.96 (m, 5H), 1.68 – 1.44 (m, 8H), 1.39 (td,  $J = 9.9, 8.3, 2.6$  Hz, 1H), 1.28 – 1.17 (m, 2H), 1.07 (d,  $J = 9.7$  Hz, 1H), 0.89 (d,  $J = 3.2$  Hz, 3H);  $^{13}\text{C-NMR}$  ( $\text{CDCl}_3$ , 100 MHz)

$\delta$  220.7, 176.4, 169.5 (d,  $J = 3.4$  Hz), 155.3, 143.0 (d,  $J = 1.5$  Hz), 137.4 (d,  $J = 4.6$  Hz), 122.2, 122.1 (d,  $J = 1.8$  Hz), 121.9, 117.2 (d,  $J = 2.4$  Hz), 50.6 (d,  $J = 1.5$  Hz), 49.9, 48.0 (d,  $J = 1.2$  Hz), 44.2 (d,  $J = 1.5$  Hz), 43.0, 40.5 (d,  $J = 2.3$  Hz), 39.3 (d,  $J = 3.1$  Hz), 38.5, 38.0 (d,  $J = 3.0$  Hz), 35.9, 32.4 (d,  $J = 1.5$  Hz), 31.5, 29.7 (d,  $J = 1.6$  Hz), 28.9 (d,  $J = 2.4$  Hz), 28.7, 26.2 (d,  $J = 3.4$  Hz), 25.9 (d,  $J = 4.4$  Hz), 21.7, 13.9 (d,  $J = 1.8$  Hz);  $^1\text{H}$  and  $^{13}\text{C}$  NMR data are consistent with previously reported.<sup>4c</sup>

Scheme 4, 6b

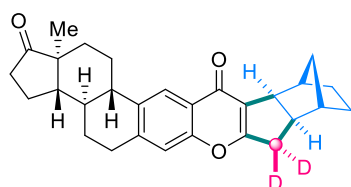

Compound **6b**: white solid, 73.6 mg, 85% yield, 80% D, m.p. 275.9 – 277.5 °C;  $^1\text{H}$ -NMR (400 MHz,  $\text{CDCl}_3$ )  $\delta$  8.08 (d,  $J = 4.3$  Hz, 1H), 7.11 (d,  $J = 2.4$  Hz, 1H), 3.09 (d,  $J = 7.5$  Hz, 1H), 3.05 – 2.91 (m, 2H), 2.63 – 2.45 (m, 3H), 2.36 – 2.24 (m, 2H), 2.17 – 1.95 (m, 5H), 1.70 – 1.45 (m, 8H), 1.40 (t,  $J = 5.7$  Hz, 1H), 1.28 – 1.24 (m, 1H), 1.22 – 1.17 (m, 1H), 1.07 (d,  $J = 10.4$  Hz, 1H), 0.89 (d,  $J = 3.2$  Hz, 3H);  $^{13}\text{C}$ -NMR ( $\text{CDCl}_3$ , 100 MHz)  $\delta$  220.6 (d,  $J = 1.5$  Hz), 176.4, 169.3 (d,  $J = 3.4$  Hz), 155.2, 142.9 (d,  $J = 1.4$  Hz), 137.3 (d,  $J = 4.7$  Hz), 122.1, 122.0 (d,  $J = 1.6$  Hz), 121.9, 117.1 (d,  $J = 2.4$  Hz), 50.5 (d,  $J = 1.5$  Hz), 49.8, 47.9 (d,  $J = 1.4$  Hz), 44.1 (d,  $J = 1.5$  Hz), 42.8, 40.3 (d,  $J = 2.3$  Hz), 40.2 (d,  $J = 2.2$  Hz), 39.2 (d,  $J = 3.2$  Hz), 37.9 (d,  $J = 3.0$  Hz), 35.8, 32.3, 31.4, 29.6 (d,  $J = 1.6$  Hz), 28.8 (d,  $J = 2.5$  Hz), 28.6, 26.1 (d,  $J = 3.4$  Hz), 25.8 (d,  $J = 4.4$  Hz), 21.6, 13.8 (d,  $J = 1.8$  Hz); HRMS (ESI-TOF): calcd. for  $[\text{C}_{29}\text{H}_{31}\text{D}_2\text{O}_3]^+$   $[\text{M} + \text{H}]^+$  431.2550; found 431.2548.

## 7. Preparative-scale experiments

### 7.1 Synthesis of **4ab** on a gram-scale

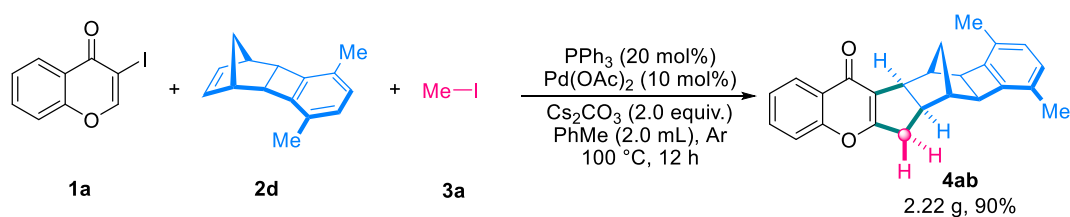

To a 250 mL flame-dried round bottom flask with a stir bar, **1a** (1.90 g, 7.0 mmol, 1.0 equiv.), **2d** (1.32 g, 14 mmol, 2.0 equiv.), Pd(OAc)<sub>2</sub> (157.2 mg, 0.7 mmol, 10 mol%), PPh<sub>3</sub> (367.2 mg, 1.4 mmol, 20 mol%), Cs<sub>2</sub>CO<sub>3</sub> (4.56 g, 14.0 mmol, 2.0 equiv.), and toluene (70.0 mL) were added. The reaction flask was evacuated and backfilled with argon three times, then, **3a** (1.55 g, 10.5 mmol, 1.5 equiv.) was added into flask. The mixture was stirred at 100 °C in a heating module for 12 h. After completion of the reaction, it was concentrated to remove solvent and purified by flash column chromatography on silica gel (petroleum ether/ethyl acetate = 20:1 ~ 5:1) to afford the product **4ab** (2.22 g, 90% yield).

### 7.2 Synthesis of **4ag** on a gram-scale

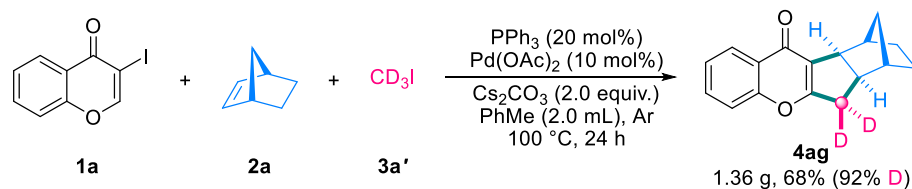

To a 250 mL flame-dried round bottom flask with a stir bar, **1a** (2.18 g, 8.0 mmol, 1.0 equiv.), **2a** (1.51 g, 16 mmol, 2.0 equiv.), Pd(OAc)<sub>2</sub> (180 mg, 0.8 mmol, 10 mol%), PPh<sub>3</sub> (420.0 mg, 1.6 mmol, 20 mol%), Cs<sub>2</sub>CO<sub>3</sub> (5.208 g, 16.0 mmol, 2.0 equiv.), and toluene (80.0 mL) were added. The reaction flask was evacuated and backfilled with argon three times, then, **3a'** (1.74 g, 12 mmol, 1.5 equiv.) was added into flask, the mixture was stirred at 100 °C in a heating module for 12 h. After completion of the reaction, it was concentrated to remove solvent and purified by flash column chromatography on silica gel (petroleum ether/ethyl acetate = 20:1 ~ 5:1) to afford the product **4ag** (1.36 g, 68% yield).

ZJK-12-2-1-h

8.2167  
8.2124  
8.1967  
8.1923  
7.5944  
7.5901  
7.5766  
7.5725  
7.5686  
7.5555  
7.5511  
7.3893  
7.3683  
7.3577  
7.3387  
7.3201  
7.2603  
3.1041  
3.0847  
2.5597  
2.5495  
2.2855  
2.2661  
2.0528  
2.0424  
1.6218  
1.6113  
1.6008  
1.5924  
1.5816  
1.5706  
1.5632  
1.5539  
1.5440  
1.5336  
1.5238  
1.5153  
1.5050  
1.4943  
1.4852  
1.4754  
1.4647  
1.4142  
1.4065  
1.4039  
1.3867  
1.3745  
1.3716  
1.3656  
1.3631  
1.3573  
1.3505  
1.2669  
1.2619  
1.2572  
1.2373  
1.2303  
1.2252  
1.2183  
1.2127  
1.2074  
1.2029  
1.1898  
1.1838  
1.1794  
1.1741  
1.0958  
1.0916  
1.0876  
1.0701  
1.0659  
1.0618

<sup>1</sup>H-NMR (400 MHz)

Solvent: CDCl<sub>3</sub>

Scheme 5, 4ag

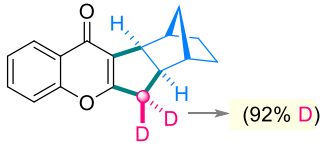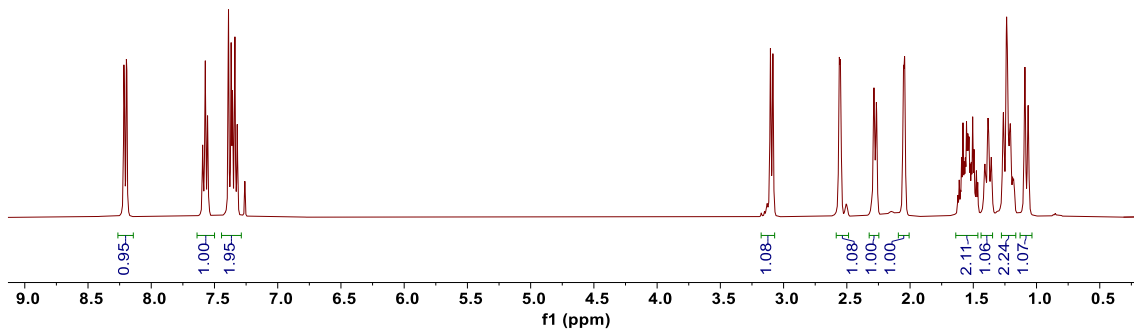



## 8. Reference

- (1) D. A. Vasselin, A. D. Westwell, C. S. Matthews, T. D. Bradshaw and M. F. G. Stevens, *J. Med. Chem.*, 2006, **49**, 3973–3981.
- (2) S. Liu, Z. Jin, Y. C. Teo and Y. Xia, *J. Am. Chem. Soc.*, 2014, **136**, 17434–17437.
- (3) M. N. Paddon-Row and R. Hartcher, *J. Am. Chem. Soc.*, 1980, **102**, 671–678.
- (4) (a) W.-Q. Zhu, Y.-C. Fang, W.-Y. Han, F. Li, M.-G. Yang and Y.-Z. Chen, *Org. Chem. Front.*, 2021, **8**, 3082–3090; (b) J. Huang, R. Zhang, X. Wu, G. Dong and Y. Xia, *Org. Lett.*, 2022, **24**, 2436–2440; (c) F. Li, H.-M. Li, R.-F. Xiu, J.-K. Zhang, B.-D. Cui, N.-W. Wan, Y.-Z. Chen and W.-Y. Han, *Org. Lett.*, 2022, **24**, 9392–9397.

### 9. <sup>1</sup>H and <sup>13</sup>C NMR spectra of 4a-ak and 6a-b

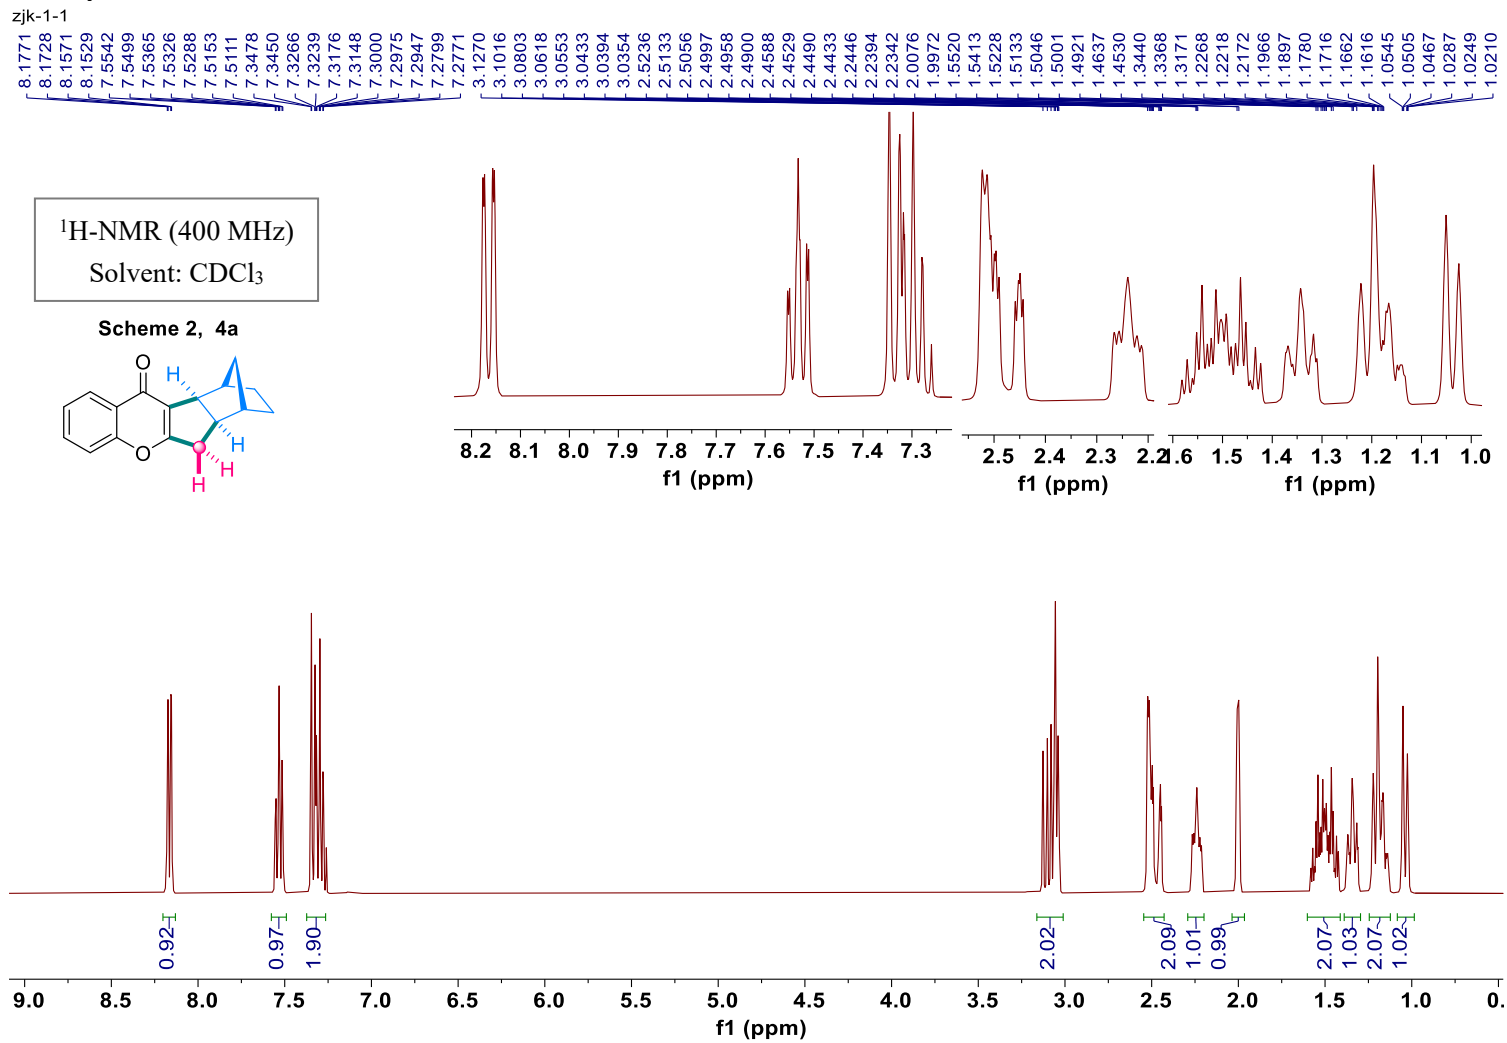

ZJK-1-1-C

— 176.19

— 169.73

— 156.81

— 132.73

— 125.71

— 124.70

— 124.27

— 122.21

— 117.86

— 77.48

— 77.16

— 76.84

— 49.78

— 42.83

— 40.40

— 39.16

— 38.37

— 32.30

— 28.75

— 28.52

$^{13}\text{C}$ -NMR (100 MHz)

Solvent:  $\text{CDCl}_3$

Scheme 2, 4a

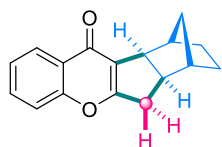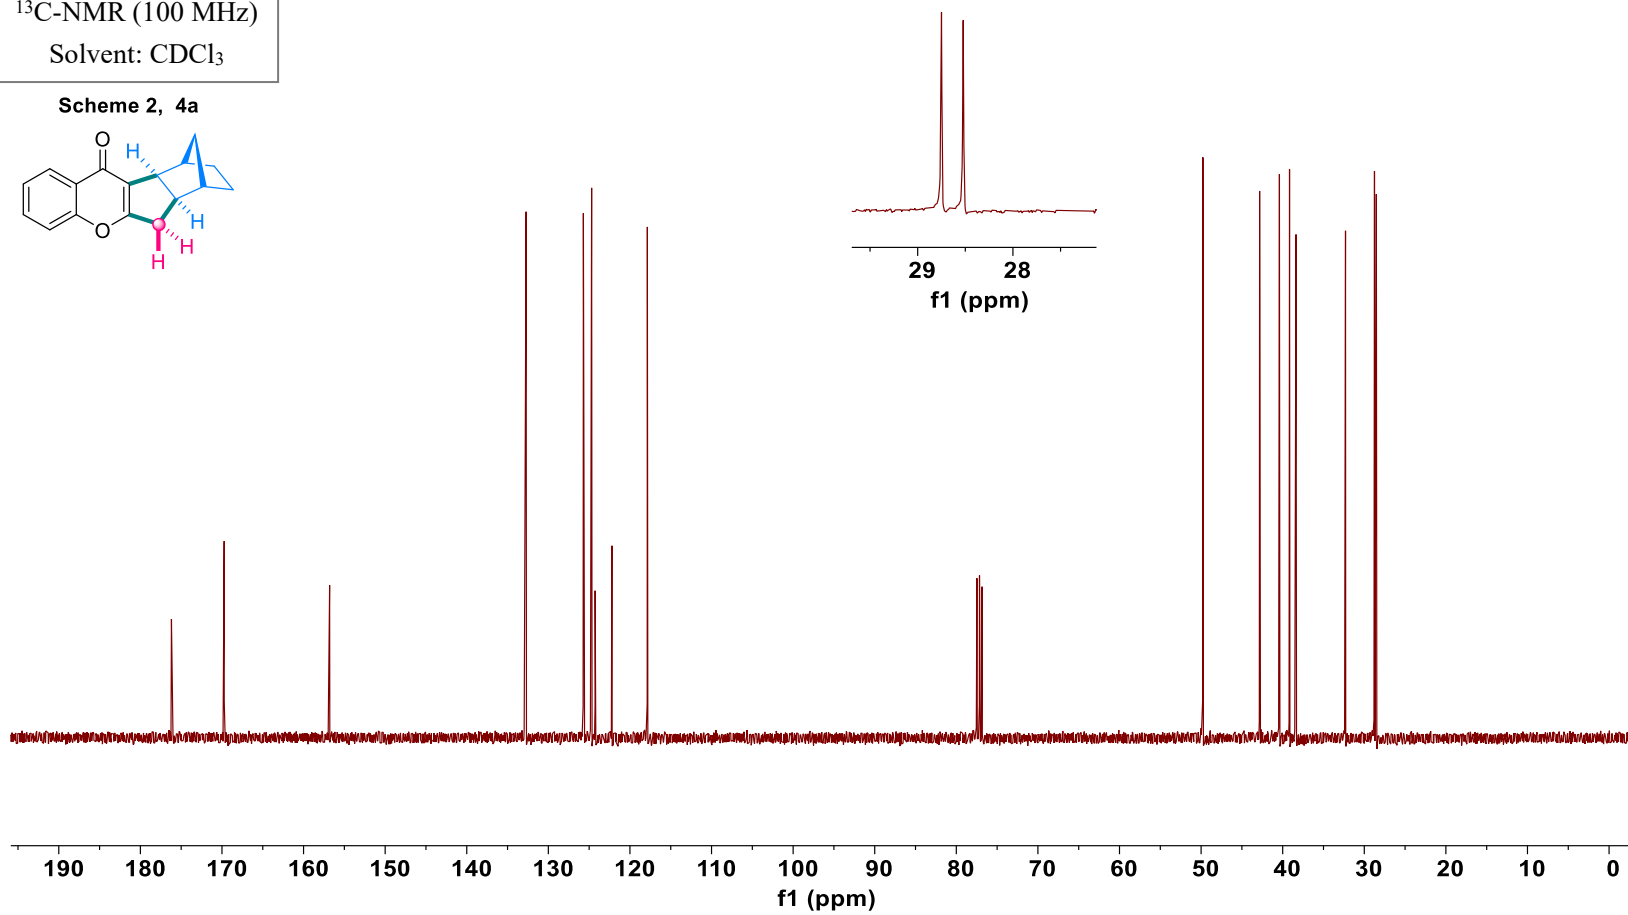

ZJK-24-1-h

7.4716  
7.4508  
7.4299  
7.2606  
6.9602  
6.9392  
6.7634  
6.7428  
3.9370  
3.1249  
3.0997  
3.0788  
3.0550  
3.0374  
2.5885  
2.5784  
2.4979  
2.4919  
2.4875  
2.4825  
2.4518  
2.4458  
2.4416  
2.4365  
2.2872  
2.2785  
2.2613  
2.2422  
2.2337  
2.0311  
2.0209  
1.5933  
1.5746  
1.5635  
1.5514  
1.5452  
1.5356  
1.5264  
1.5184  
1.5090  
1.5008  
1.4904  
1.4795  
1.4610  
1.4504  
1.3934  
1.3869  
1.3626  
1.3419  
1.3363  
1.3302  
1.2661  
1.2607  
1.2378  
1.2310  
1.2180  
1.2124  
1.2055  
1.1941  
1.1872  
1.1677  
1.1603  
1.1549  
1.0779  
1.0736  
1.0703  
1.0515  
1.0478  
1.0442

<sup>1</sup>H-NMR (400 MHz)

Solvent: CDCl<sub>3</sub>

Scheme 2, 4b

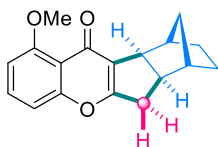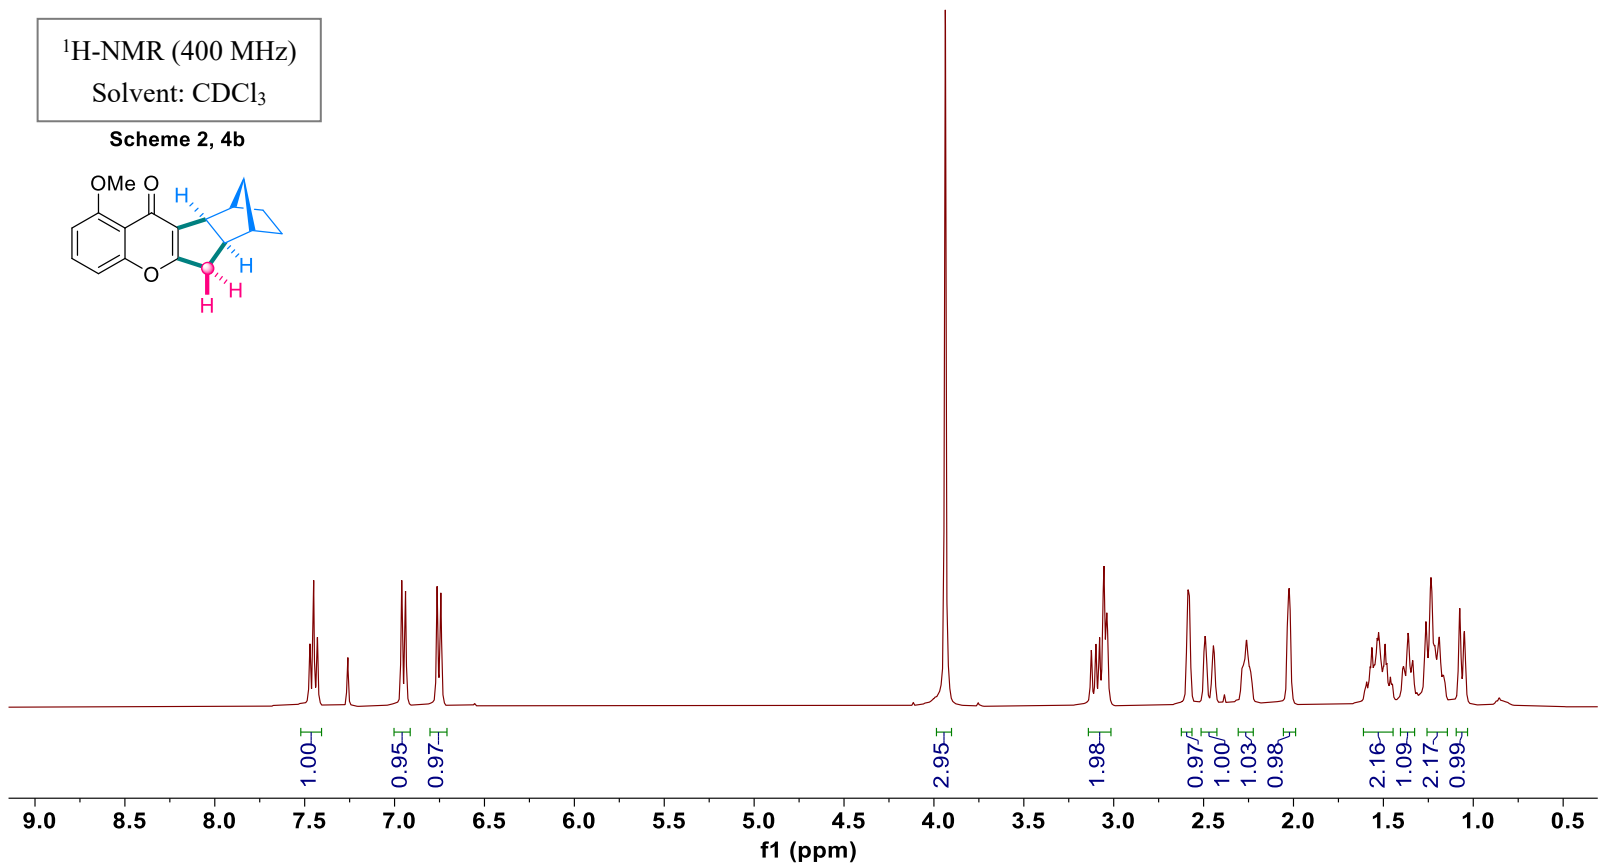

ZJK-24-1-C

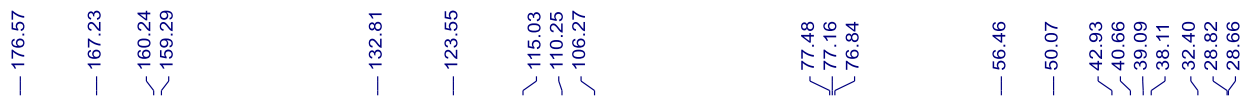

$^{13}\text{C}$ -NMR (100 MHz)

Solvent:  $\text{CDCl}_3$

Scheme 2, 4b

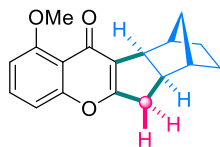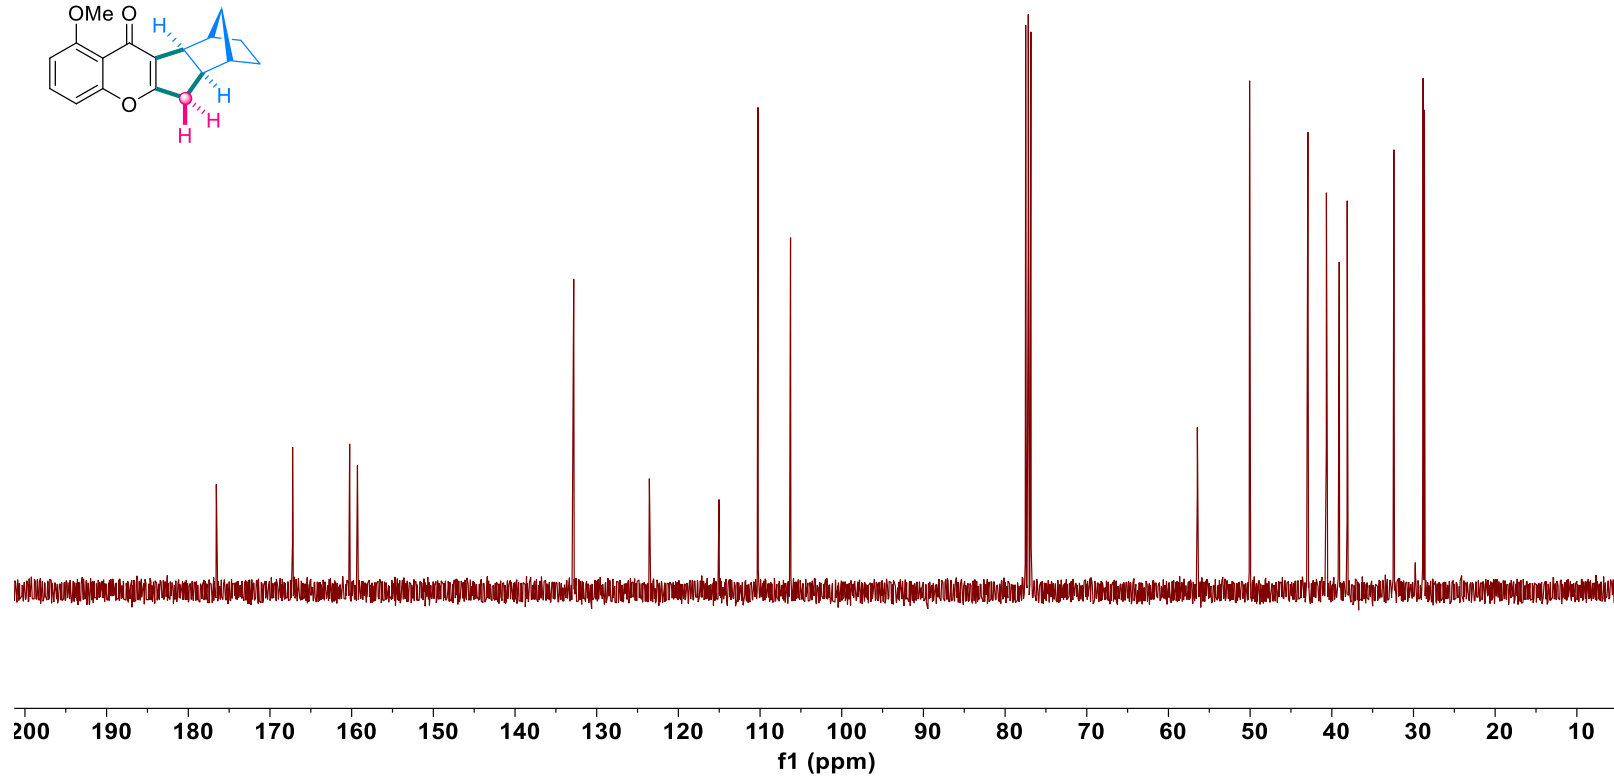

S28

ZJK-23-2-h

7.5203  
7.5065  
7.4994  
7.4857  
7.4784  
7.4650  
7.2601  
7.1918  
7.1705  
7.0016  
6.9809  
6.9744  
6.9542  
3.1571  
3.1316  
3.1102  
3.0846  
3.0742  
3.0552  
2.5592  
2.5491  
2.5311  
2.5251  
2.5213  
2.5153  
2.4842  
2.4781  
2.4743  
2.4685  
2.3107  
2.3014  
2.2840  
2.2657  
2.2562  
2.0511  
2.0409  
1.5857  
1.5748  
1.5639  
1.5565  
1.5471  
1.5382  
1.5301  
1.5209  
1.5121  
1.5020  
1.4914  
1.4722  
1.3964  
1.3899  
1.3660  
1.3590  
1.3452  
1.3394  
1.2654  
1.2605  
1.2557  
1.2385  
1.2341  
1.2304  
1.2242  
1.2117  
1.2054  
1.1996  
1.1952  
1.1761  
1.1051  
1.1010  
1.0969  
1.0794  
1.0751  
1.0709

<sup>1</sup>H-NMR (400 MHz)

Solvent: CDCl<sub>3</sub>

Scheme 2, 4c

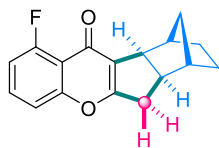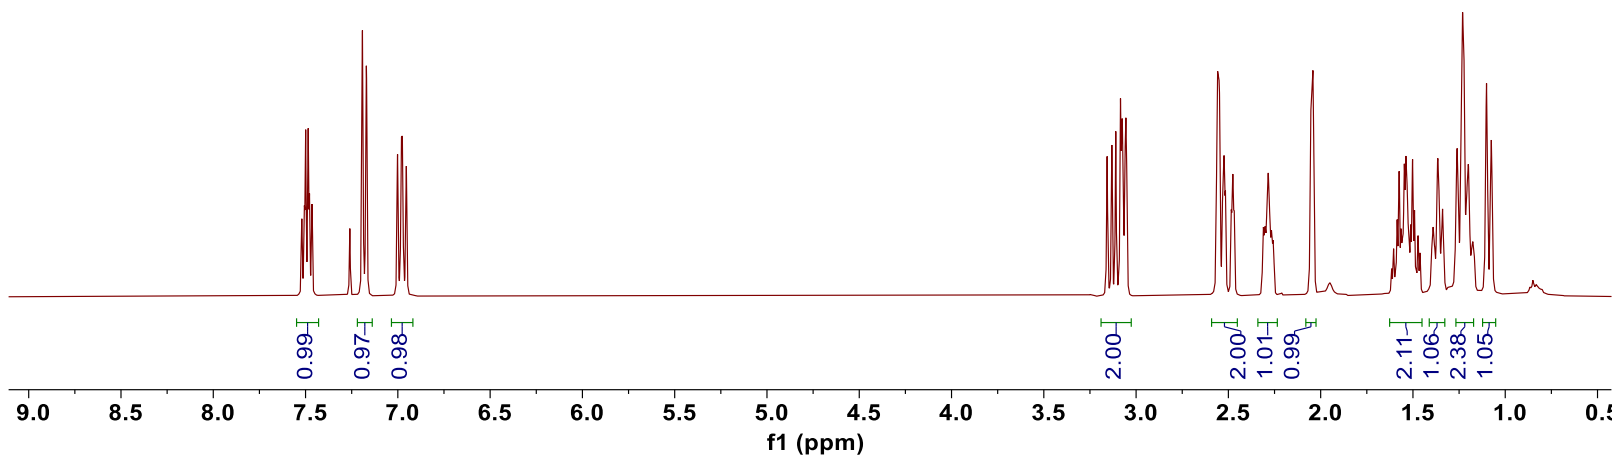

ZJK-23-2-C

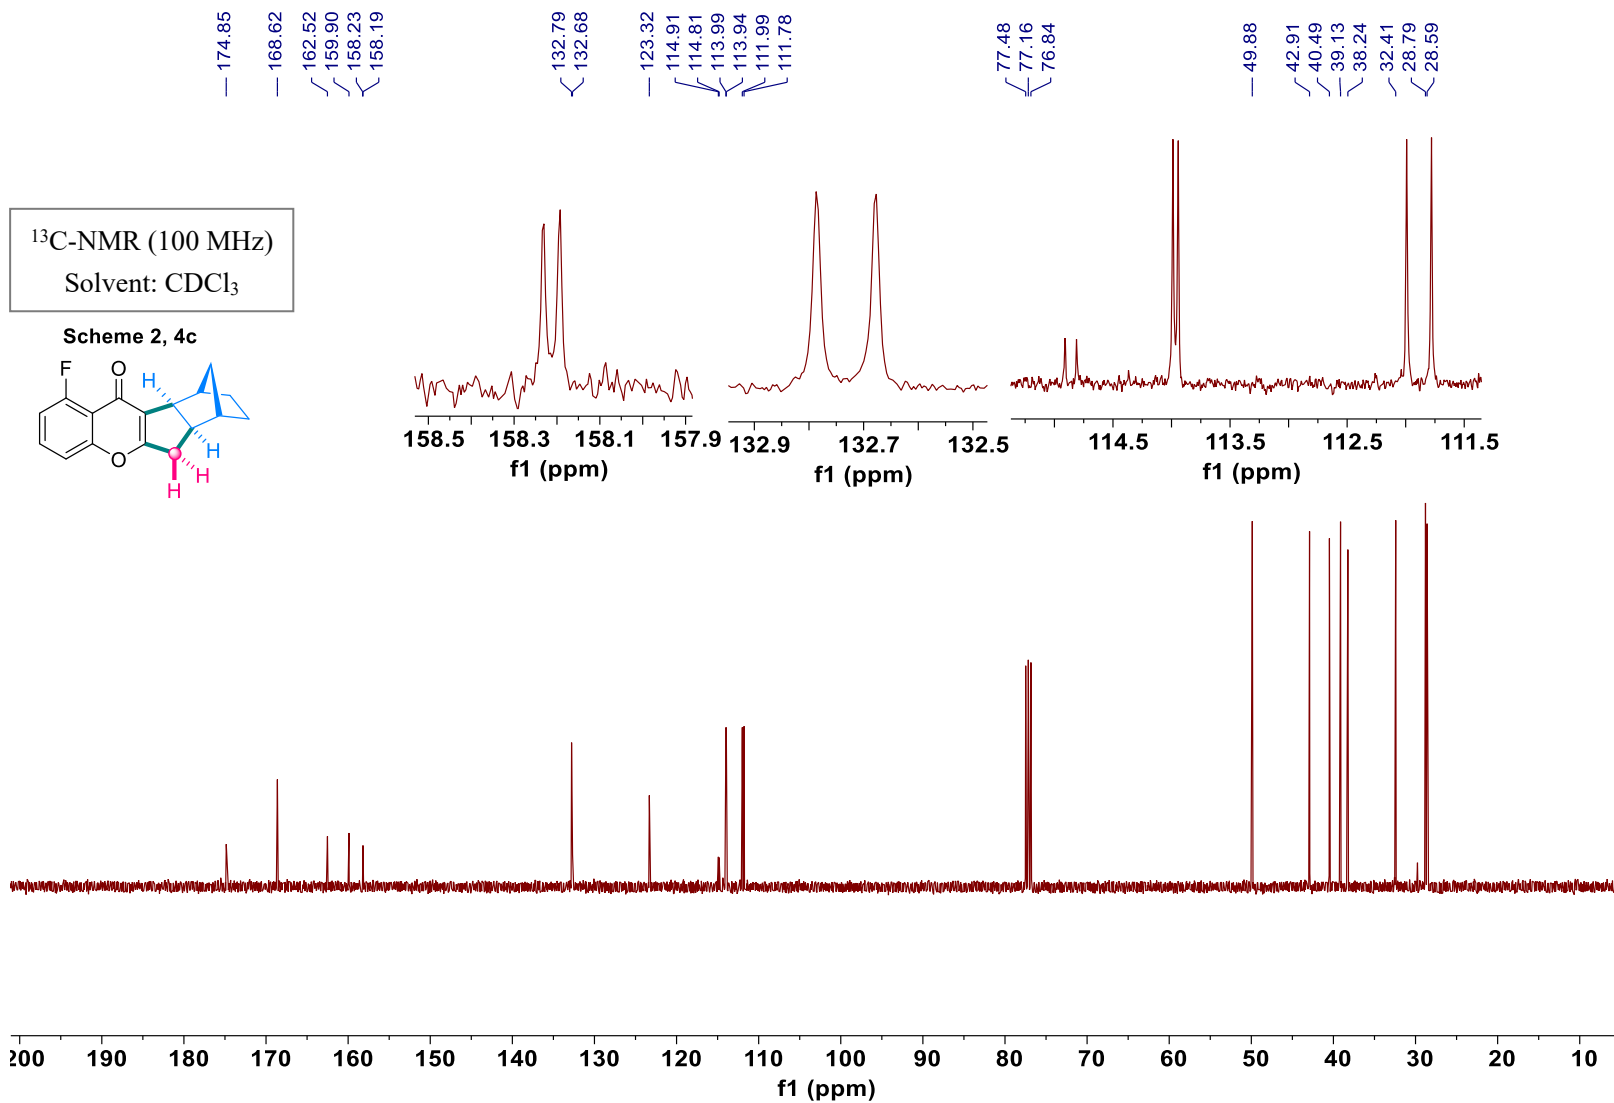

ZJK-23-1-h

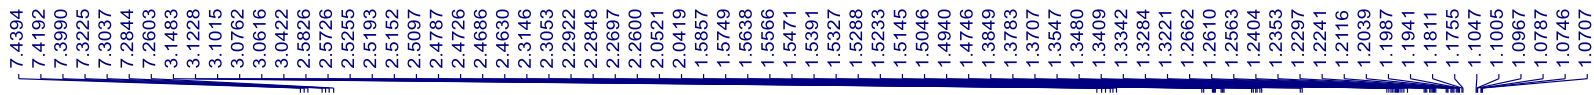

<sup>1</sup>H-NMR (400 MHz)

Solvent: CDCl<sub>3</sub>

Scheme 2, 4d

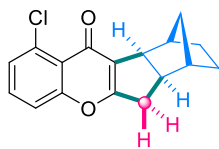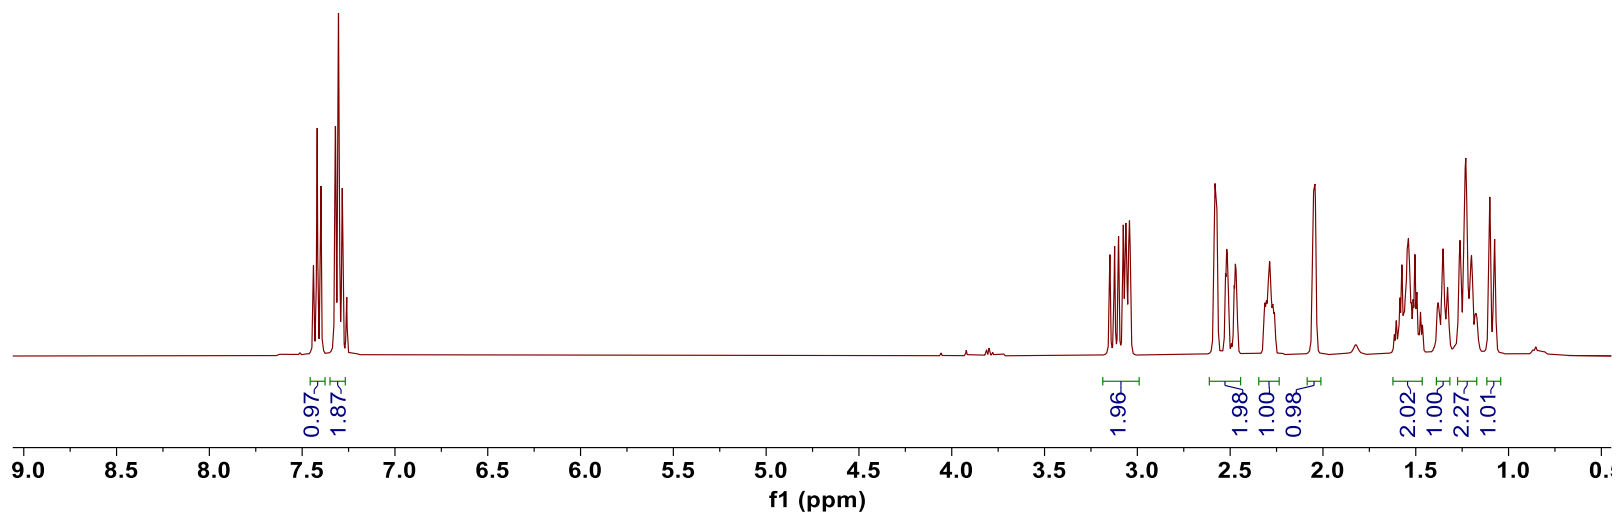



ZJK-23-1-C

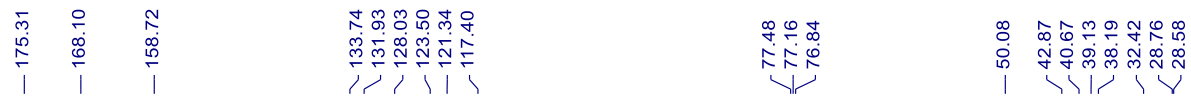

<sup>13</sup>C-NMR (100 MHz)  
Solvent: CDCl<sub>3</sub>

Scheme 2, 4d

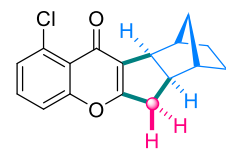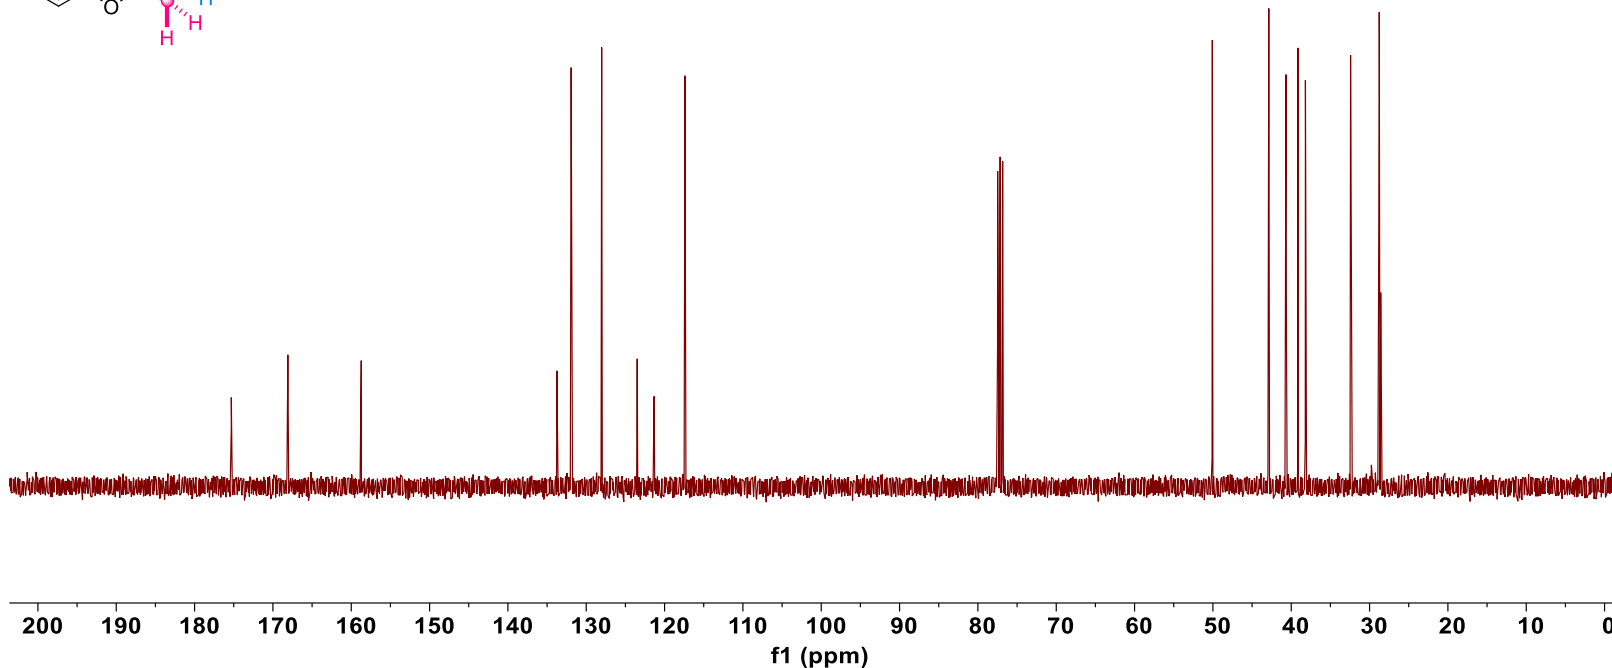

ZJK-24-2-h

7.9771  
7.9714  
7.3830  
7.3775  
7.3617  
7.3561  
7.2760  
7.2540  
3.1569  
3.1314  
3.1104  
3.0963  
3.0840  
3.0753  
2.5479  
2.5377  
2.5317  
2.5258  
2.5214  
2.5161  
2.4850  
2.4791  
2.4748  
2.4696  
2.4038  
2.3030  
2.2939  
2.2796  
2.2735  
2.2575  
2.2479  
2.0396  
1.6132  
1.6026  
1.5923  
1.5838  
1.5730  
1.5621  
1.5548  
1.5452  
1.5346  
1.5245  
1.5147  
1.5063  
1.4960  
1.4854  
1.4763  
1.4665  
1.4559  
1.4096  
1.4031  
1.3950  
1.3799  
1.3725  
1.3586  
1.3526  
1.3461  
1.2555  
1.2507  
1.2459  
1.2288  
1.2220  
1.2053  
1.1987  
1.1812  
1.1754  
1.1709  
1.1658  
1.0785  
1.0541

<sup>1</sup>H-NMR (400 MHz)

Solvent: CDCl<sub>3</sub>

Scheme 2, 4e

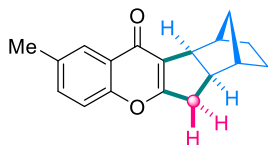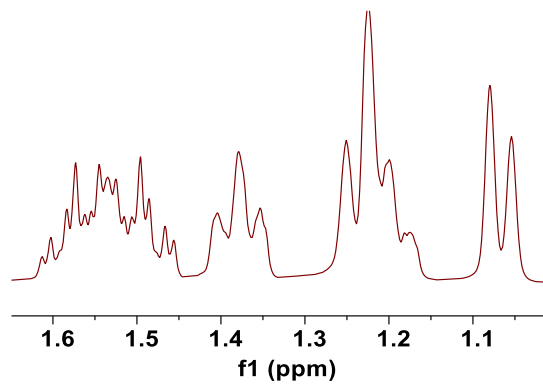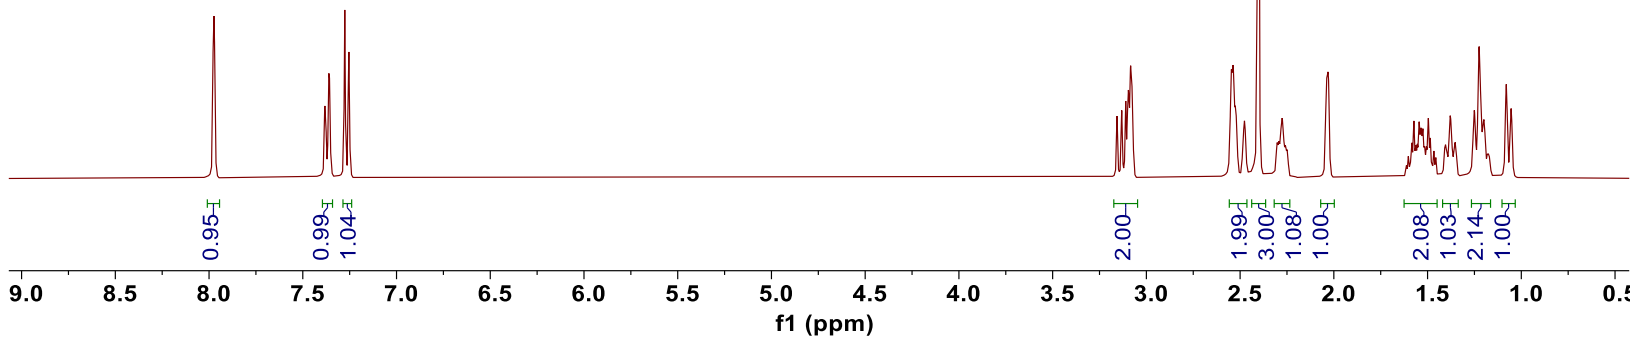

ZJK-24-2-c

— 176.46

— 169.73

— 155.24

— 134.65

— 133.99

— 125.26

— 124.06

— 122.17

— 117.67

— 77.48

— 77.16

— 76.84

— 49.90

— 42.97

— 40.55

— 39.28

— 38.47

— 32.41

— 28.86

— 28.65

— 20.97

$^{13}\text{C-NMR}$  (100 MHz)

Solvent:  $\text{CDCl}_3$

Scheme 2, 4e

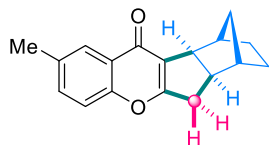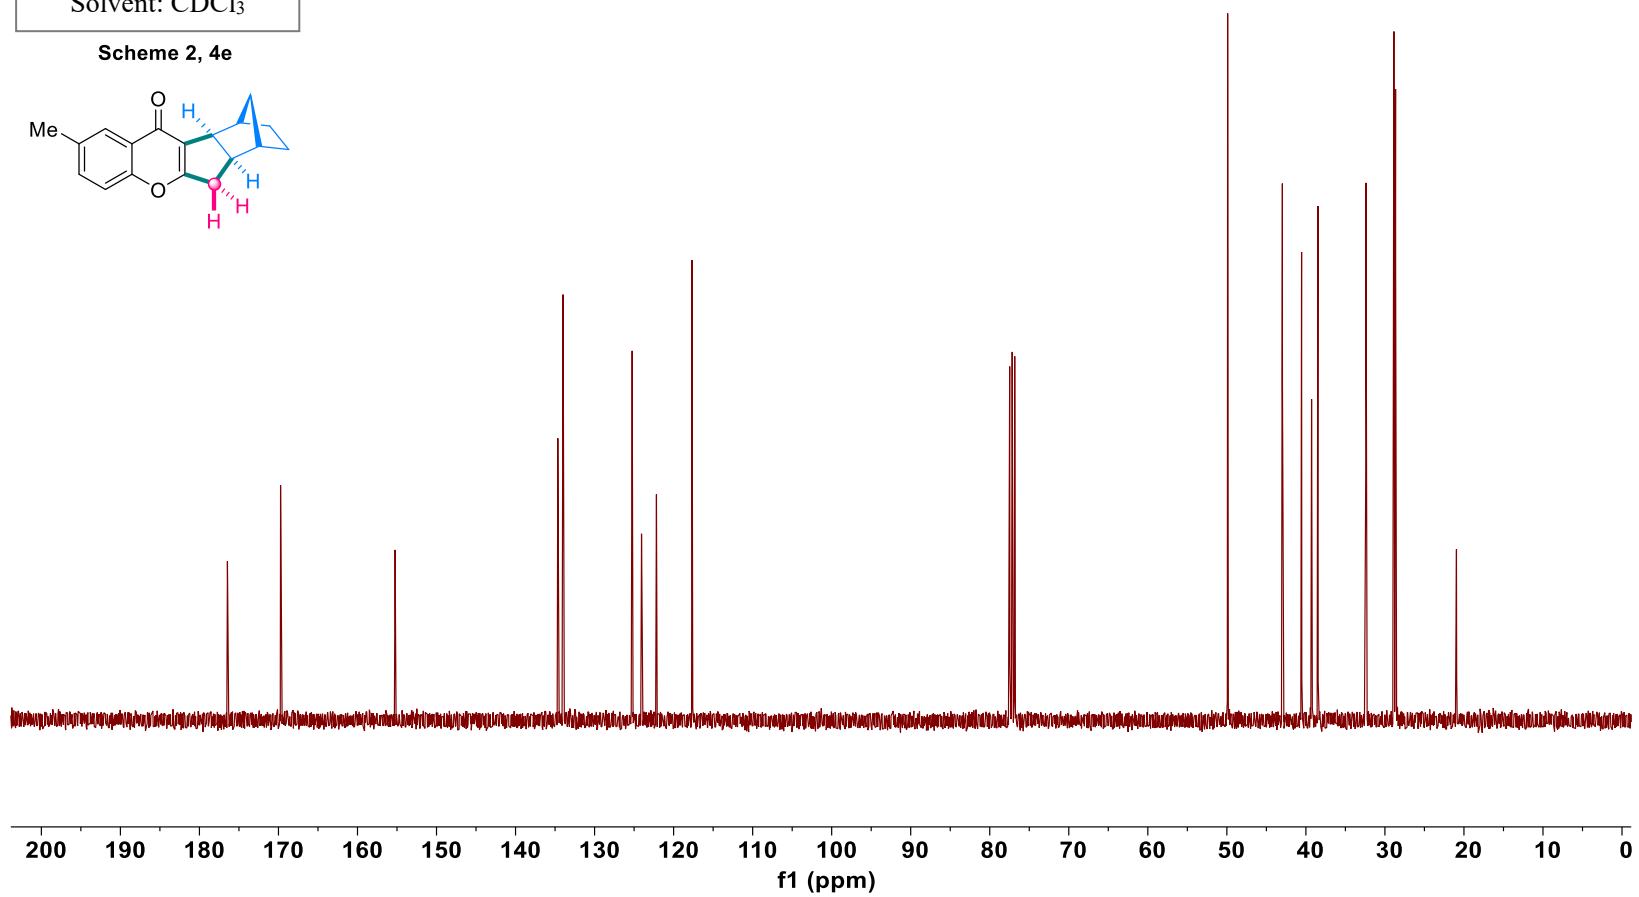

S34

ZJK-25-1-h

7.5725  
7.5647  
7.3186  
7.2959  
7.2600  
7.1708  
7.1636  
7.1482  
7.1408  
3.8769  
3.8615  
3.1646  
3.1392  
3.1181  
3.1114  
3.1067  
3.0921  
3.0856  
2.5574  
2.5475  
2.5391  
2.5322  
2.5279  
2.5232  
2.4919  
2.4856  
2.4815  
2.4766  
2.3143  
2.3058  
2.2921  
2.2869  
2.2799  
2.2696  
2.2600  
2.0462  
2.0360  
1.6130  
1.5945  
1.5836  
1.5726  
1.5651  
1.5554  
1.5460  
1.5403  
1.5318  
1.5219  
1.5130  
1.5029  
1.4924  
1.4842  
1.4736  
1.4630  
1.4202  
1.4136  
1.4052  
1.3910  
1.3833  
1.3692  
1.3630  
1.3564  
1.2548  
1.2286  
1.2120  
1.2067  
1.2026  
1.1890  
1.1826  
1.1787  
1.1738  
1.0864  
1.0609

<sup>1</sup>H-NMR (400 MHz)

Solvent: CDCl<sub>3</sub>

Scheme 2, 4f

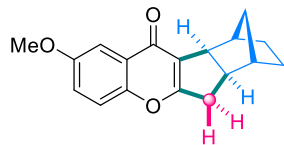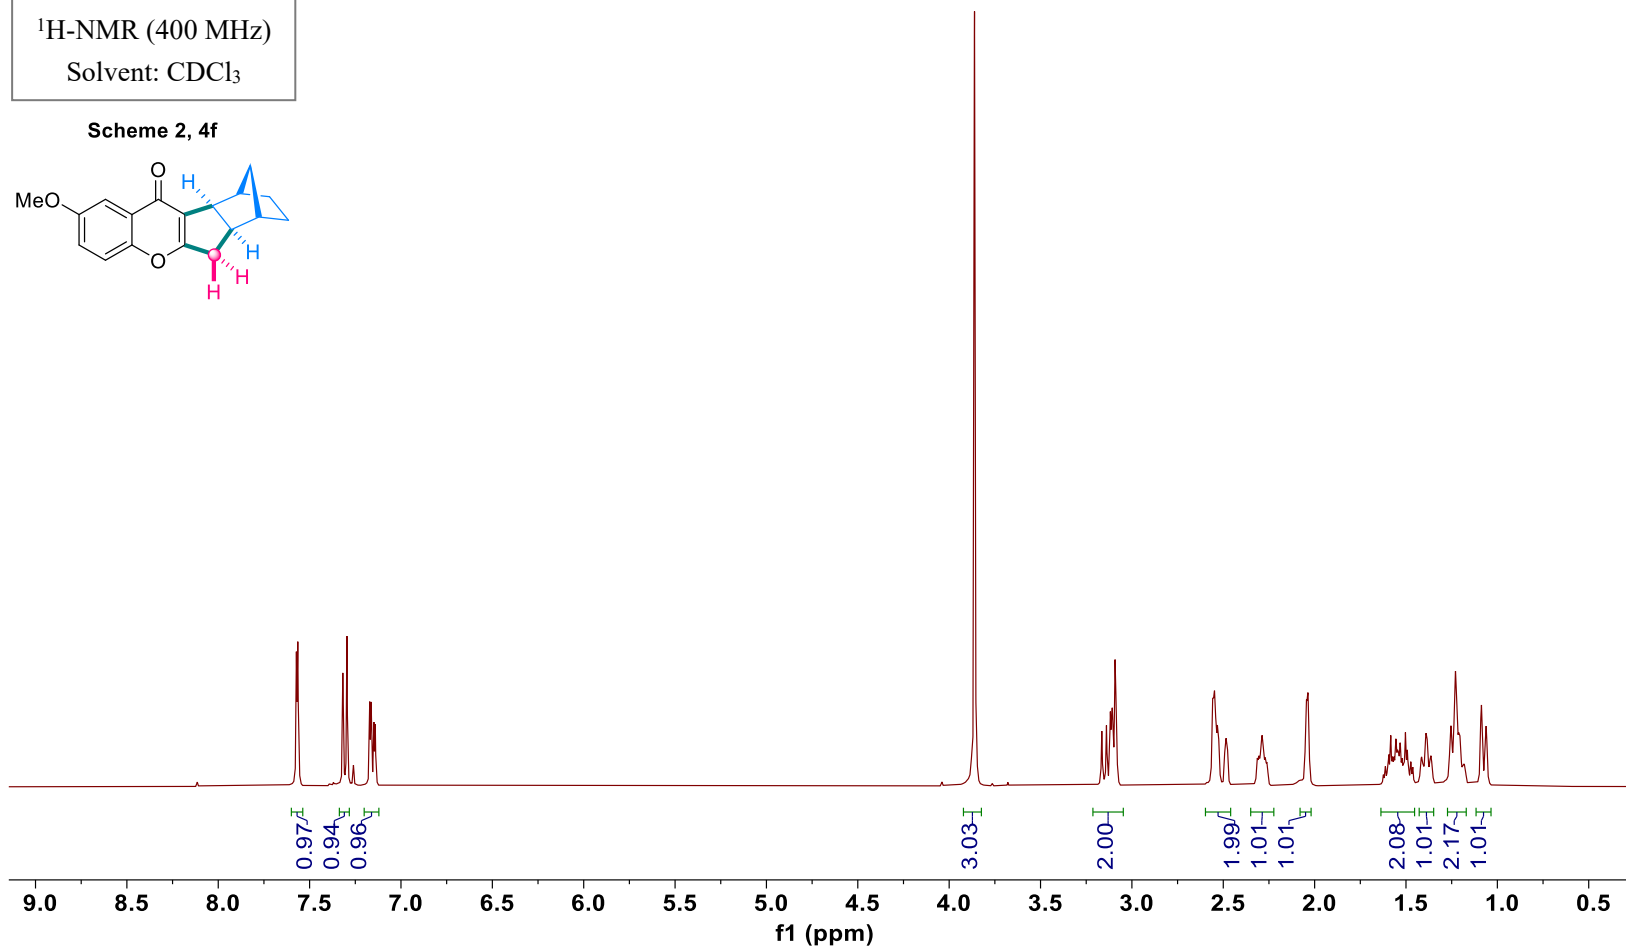

ZJK-25-1-C

— 176.14

— 169.74

— 156.67

— 151.75

∨ 125.02

∨ 122.59

∨ 121.70

∨ 119.25

— 105.19

∨ 77.48

∨ 77.16

∨ 76.84

— 55.92

— 49.88

∨ 42.99

∨ 40.61

∨ 39.26

∨ 38.42

∨ 32.41

∨ 28.86

∨ 28.65

$^{13}\text{C}$ -NMR (100 MHz)

Solvent:  $\text{CDCl}_3$

Scheme 2, 4f

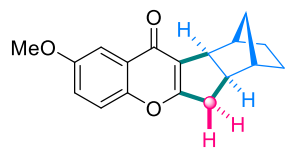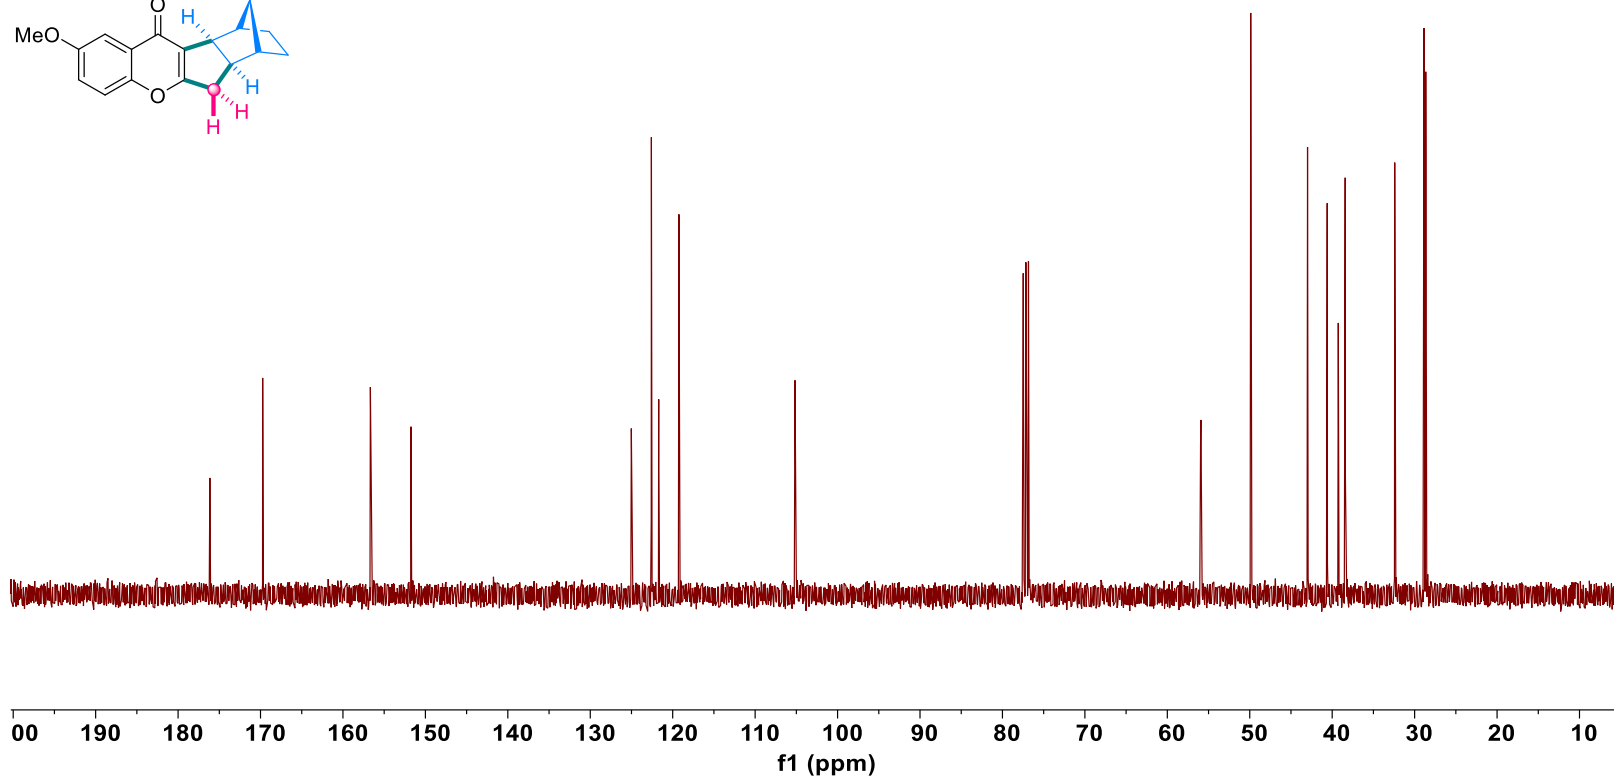

S36

ZJK-2-10-1-1-h

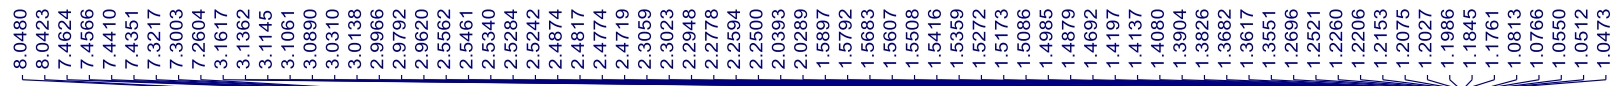

<sup>1</sup>H-NMR (400 MHz)  
Solvent: CDCl<sub>3</sub>

Scheme 2, 4g

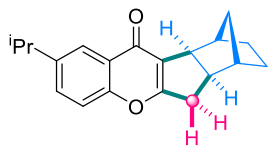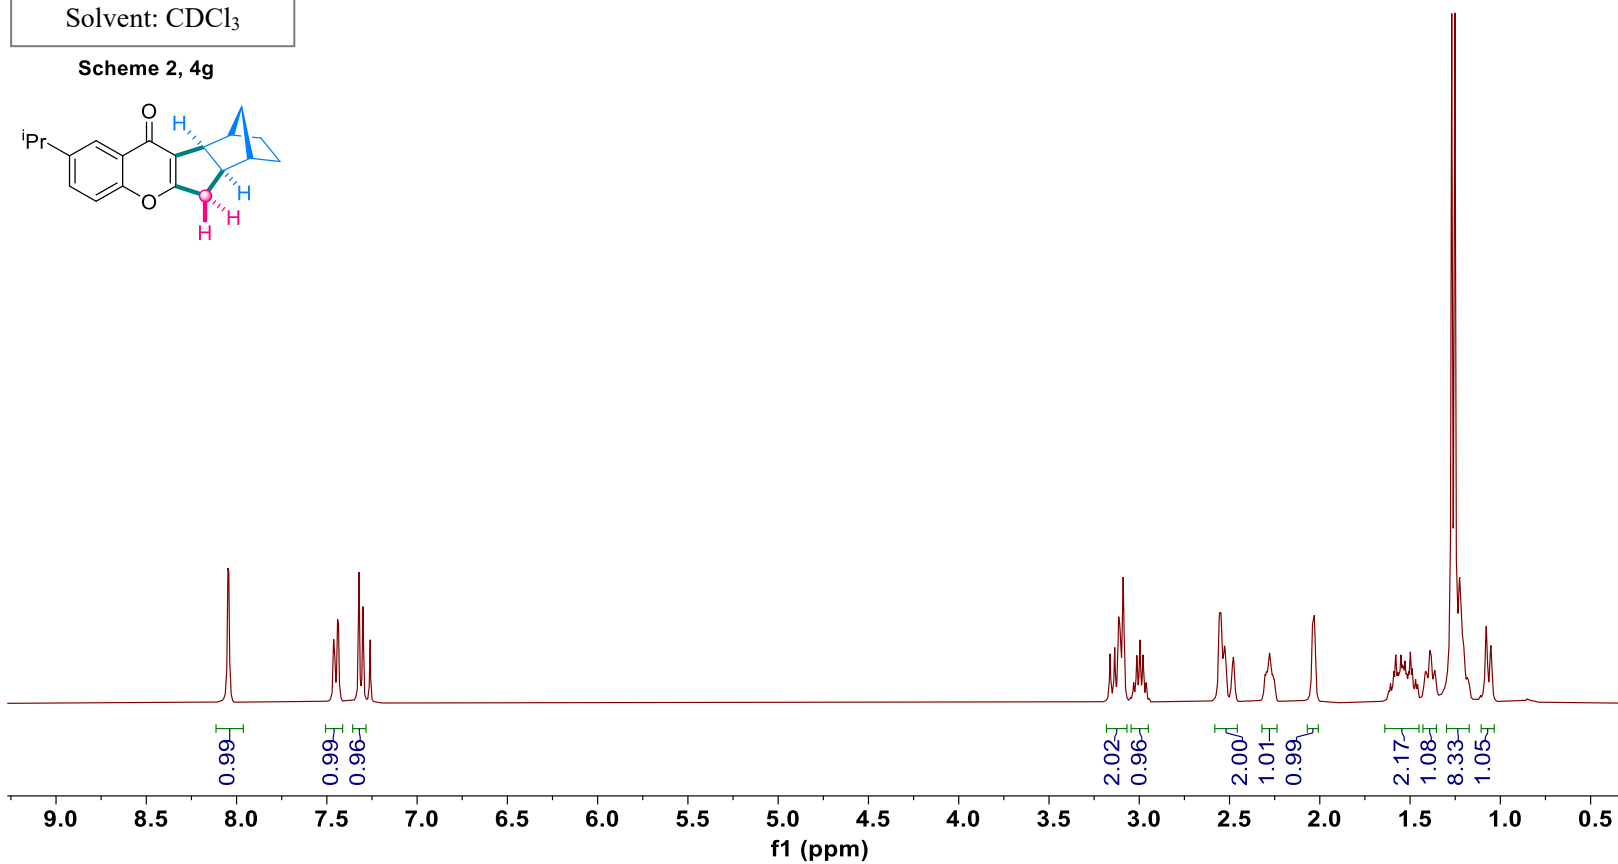

ZJK-2-10-1-C

— 176.56

— 169.69

— 155.41

— 145.64

— 131.63

— 124.13

— 122.64

— 122.15

— 117.80

— 77.48

— 77.16

— 76.84

— 49.90

— 42.98

— 40.53

— 39.26

— 38.45

— 33.82

— 32.38

— 28.86

— 28.65

— 24.11

— 24.03

$^{13}\text{C}$ -NMR (100 MHz)

Solvent:  $\text{CDCl}_3$

Scheme 2, 4g

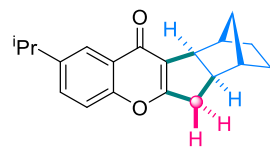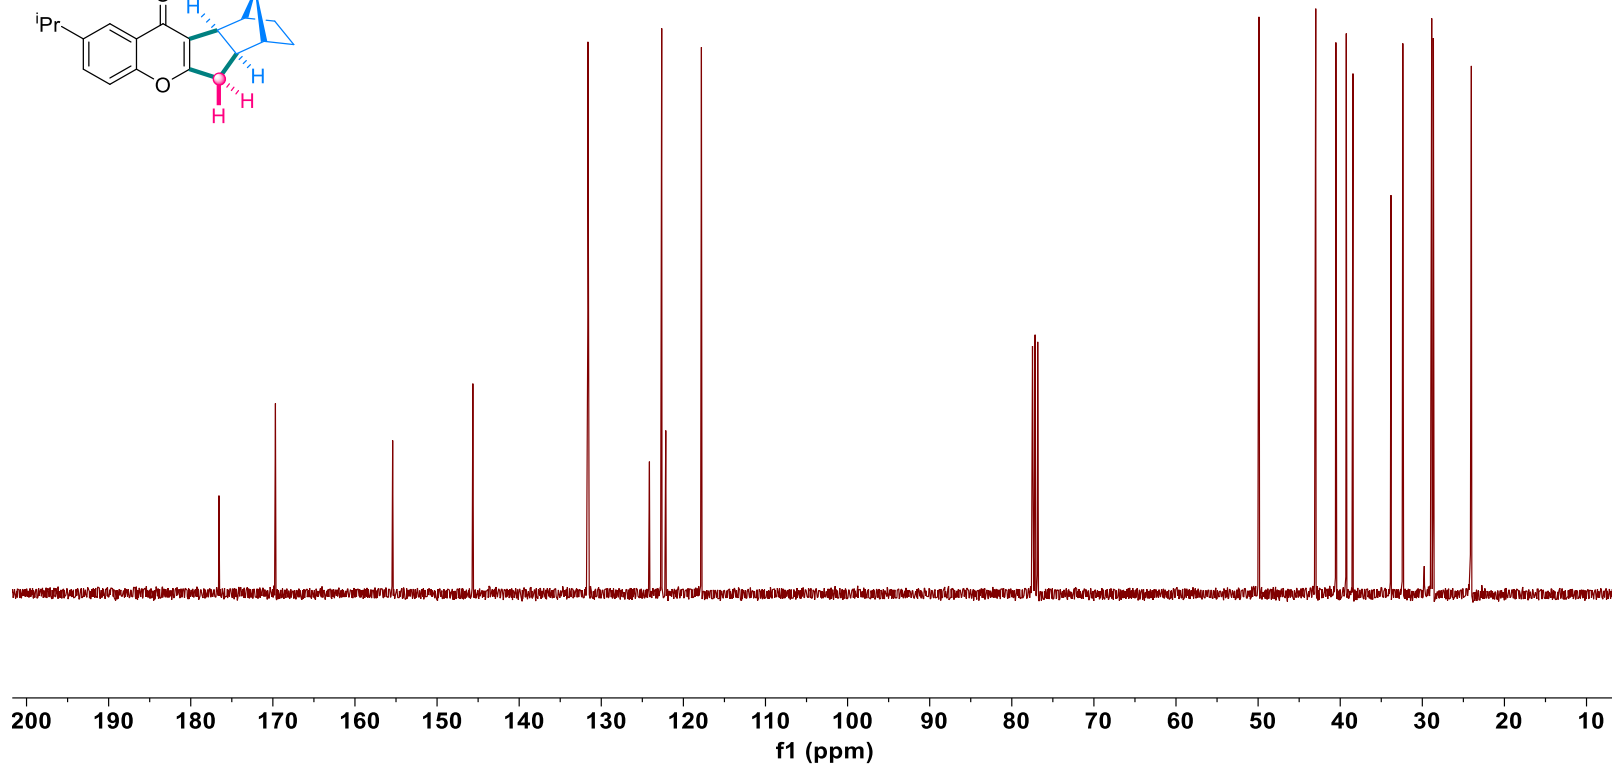

ZJK-25-2-h

7.8440  
7.8364  
7.8228  
7.8151  
7.4072  
7.3967  
7.3844  
7.3739  
7.3205  
7.3129  
7.3015  
7.2971  
7.2936  
7.2894  
7.2789  
7.2711  
7.2602  
3.1882  
3.1628  
3.1413  
3.1159  
3.1016  
3.0822  
2.5638  
2.5580  
2.5534  
2.5478  
2.5376  
2.5167  
2.5109  
2.5066  
2.5012  
2.3387  
2.3296  
2.3196  
2.3157  
2.3107  
2.3050  
2.2934  
2.0664  
2.0562  
1.5986  
1.5878  
1.5770  
1.5693  
1.5600  
1.5514  
1.5428  
1.5335  
1.5245  
1.5145  
1.5040  
1.4139  
1.4079  
1.4033  
1.3846  
1.3769  
1.3629  
1.3568  
1.2624  
1.2577  
1.2528  
1.2477  
1.2416  
1.2363  
1.2314  
1.2265  
1.2206  
1.2154  
1.2109  
1.1069  
1.0810

<sup>1</sup>H-NMR (400 MHz)

Solvent: CDCl<sub>3</sub>

Scheme 2, 4h

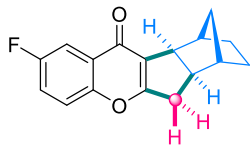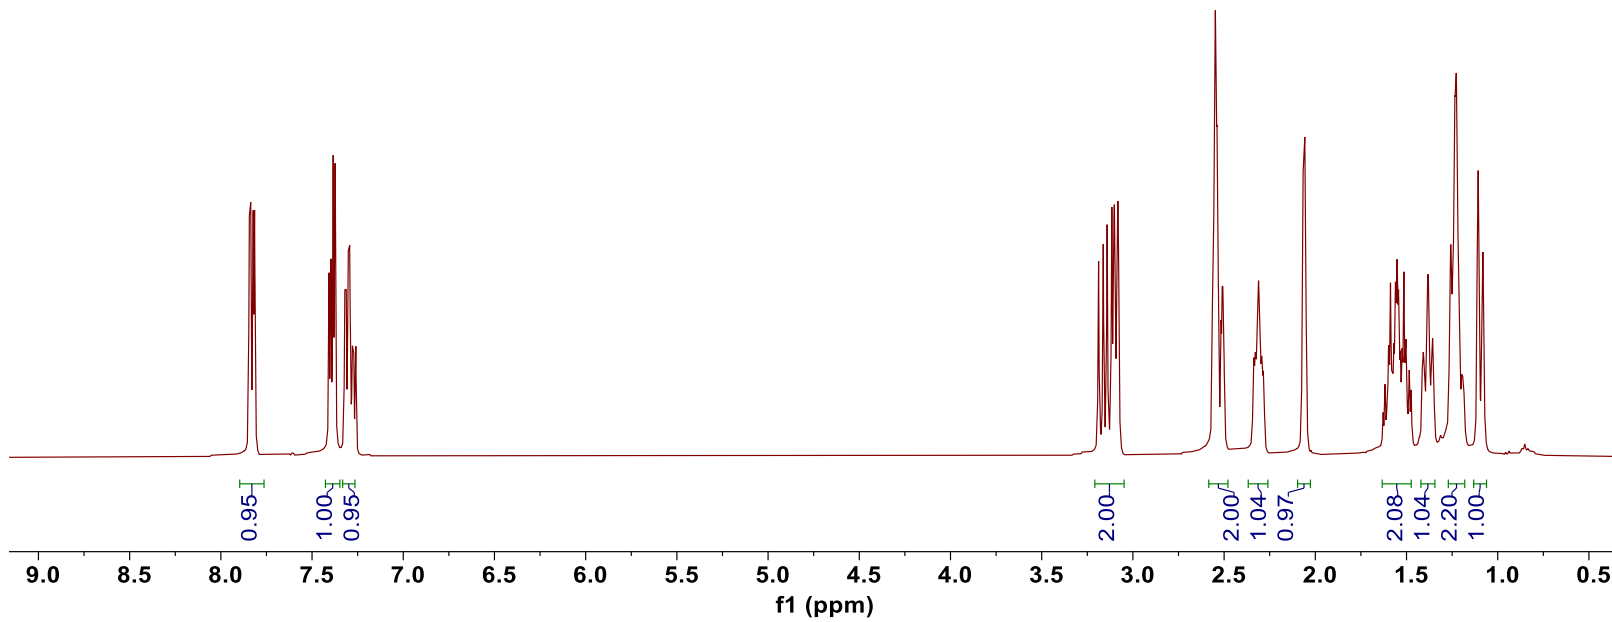

S39



ZJK-25-2-C

175.38  
175.36  
170.25

160.58  
158.13  
153.03  
153.02

125.64  
125.57  
121.80  
120.87  
120.62  
119.85  
119.77  
110.80  
110.78  
110.56  
110.54

49.71  
42.86  
40.49  
39.18  
39.17  
38.36  
32.33  
28.74  
28.51

$^{13}\text{C}$ -NMR (100 MHz)  
Solvent:  $\text{CDCl}_3$

Scheme 2, 4h

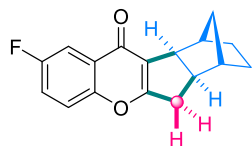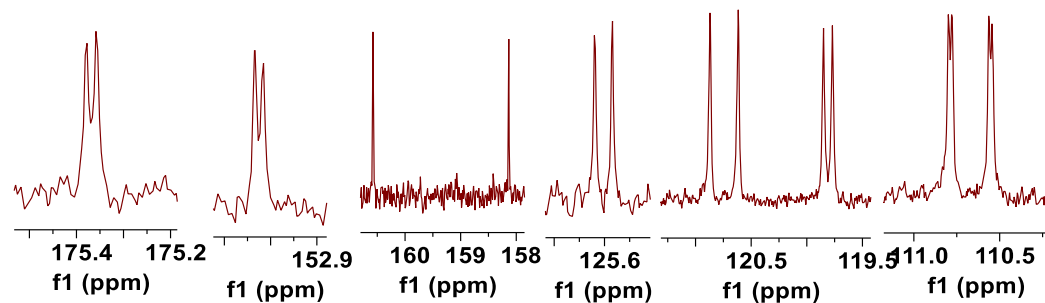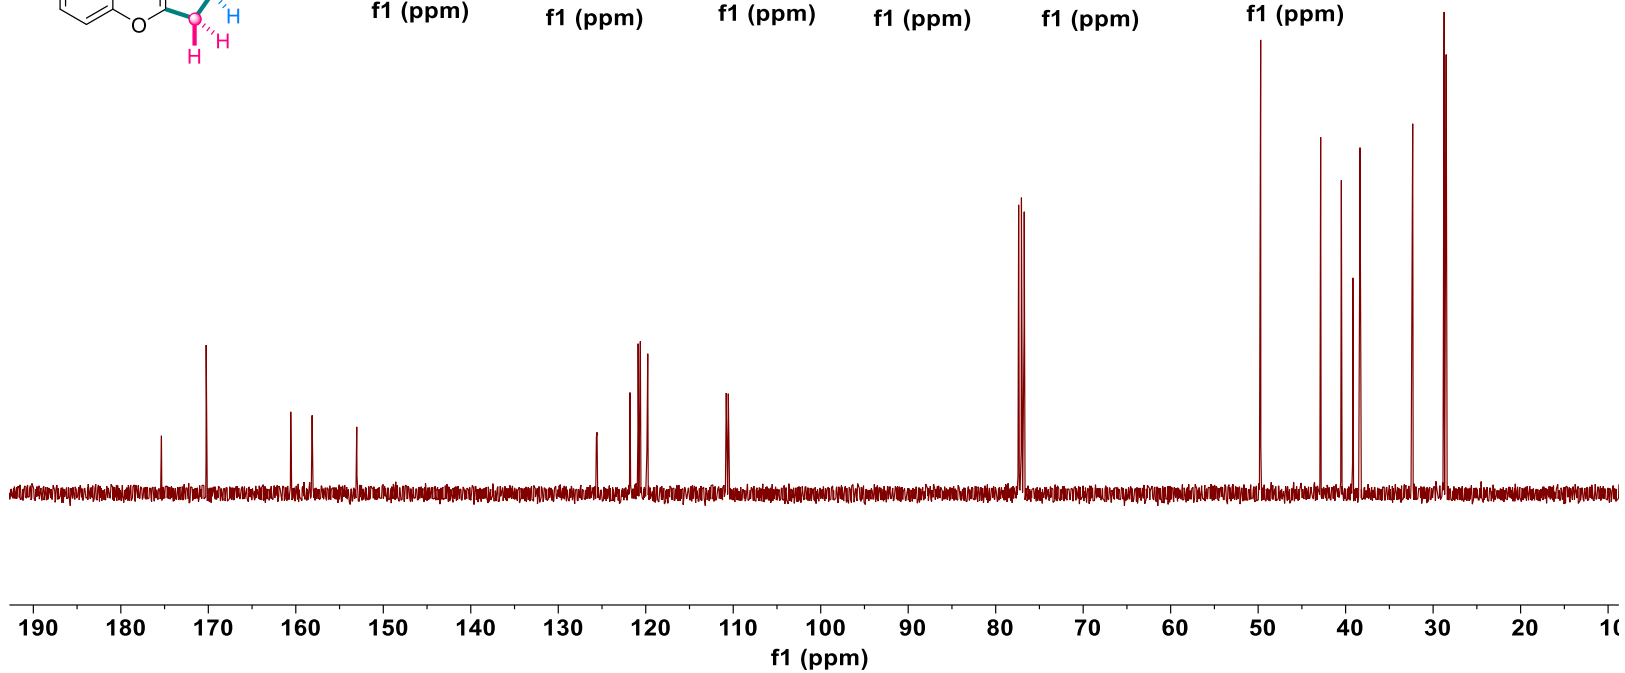

ZJK-26-1-h

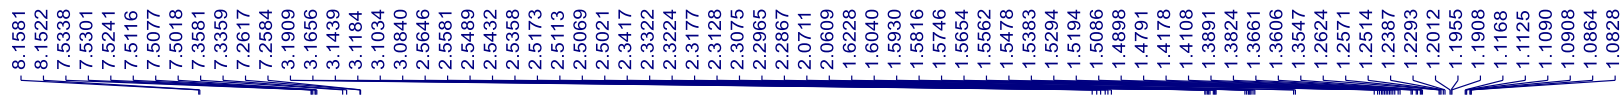

<sup>1</sup>H-NMR (400 MHz)  
Solvent: CDCl<sub>3</sub>

Scheme 2, 4i

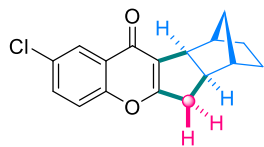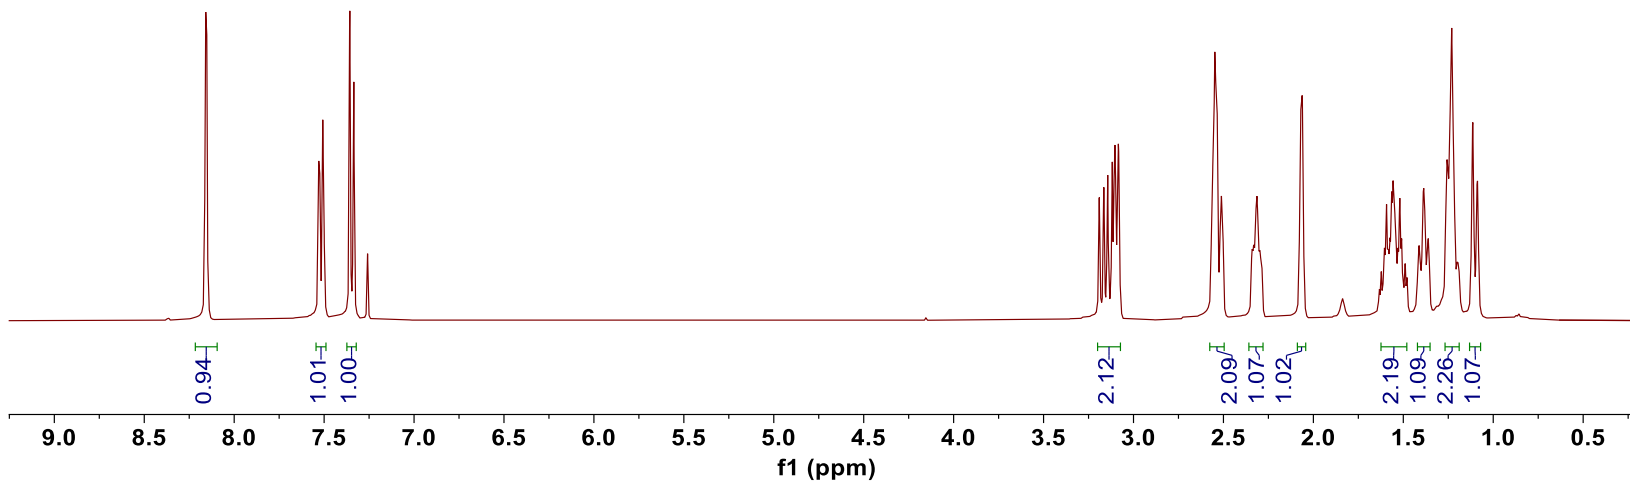

ZJK-26-1-C

— 175.09  
— 170.23

— 155.29

— 132.97  
— 130.75  
— 125.49  
— 125.36  
— 122.53  
— 119.68

— 77.48  
— 77.16  
— 76.84

— 49.86  
— 42.97  
— 40.57  
— 39.28  
— 38.48  
— 32.45  
— 28.85  
— 28.61

$^{13}\text{C}$ -NMR (100 MHz)  
Solvent:  $\text{CDCl}_3$

Scheme 2, 4i

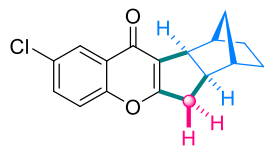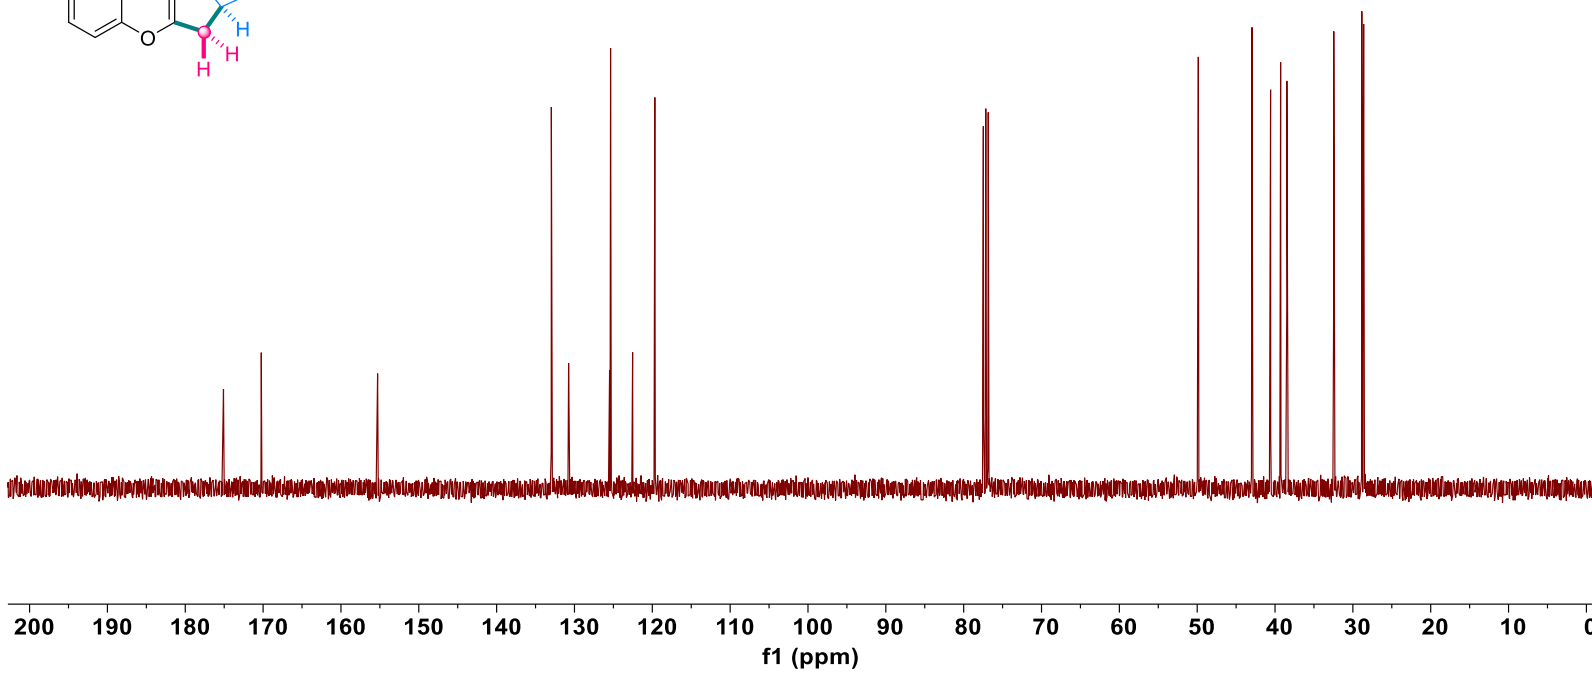

ZJK-26-2-h

8.3267  
8.3204  
7.6685  
7.6527  
7.3029  
7.2808  
7.2601

3.1949  
3.1695  
3.1480  
3.1221  
3.1095  
3.0909  
2.5686  
2.5610  
2.5508  
2.5394  
2.5213  
2.5132  
2.5058  
2.3469  
2.3370  
2.3190  
2.3006  
2.2909  
2.0757  
1.6284  
1.6095  
1.5986  
1.5875  
1.5794  
1.5703  
1.5611  
1.5525  
1.5439  
1.5342  
1.5244  
1.5134  
1.4948  
1.4230  
1.4160  
1.3922  
1.3671  
1.2590  
1.2348  
1.1989  
1.1197  
1.0936

<sup>1</sup>H-NMR (400 MHz)

Solvent: CDCl<sub>3</sub>

Scheme 2, 4j

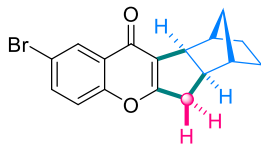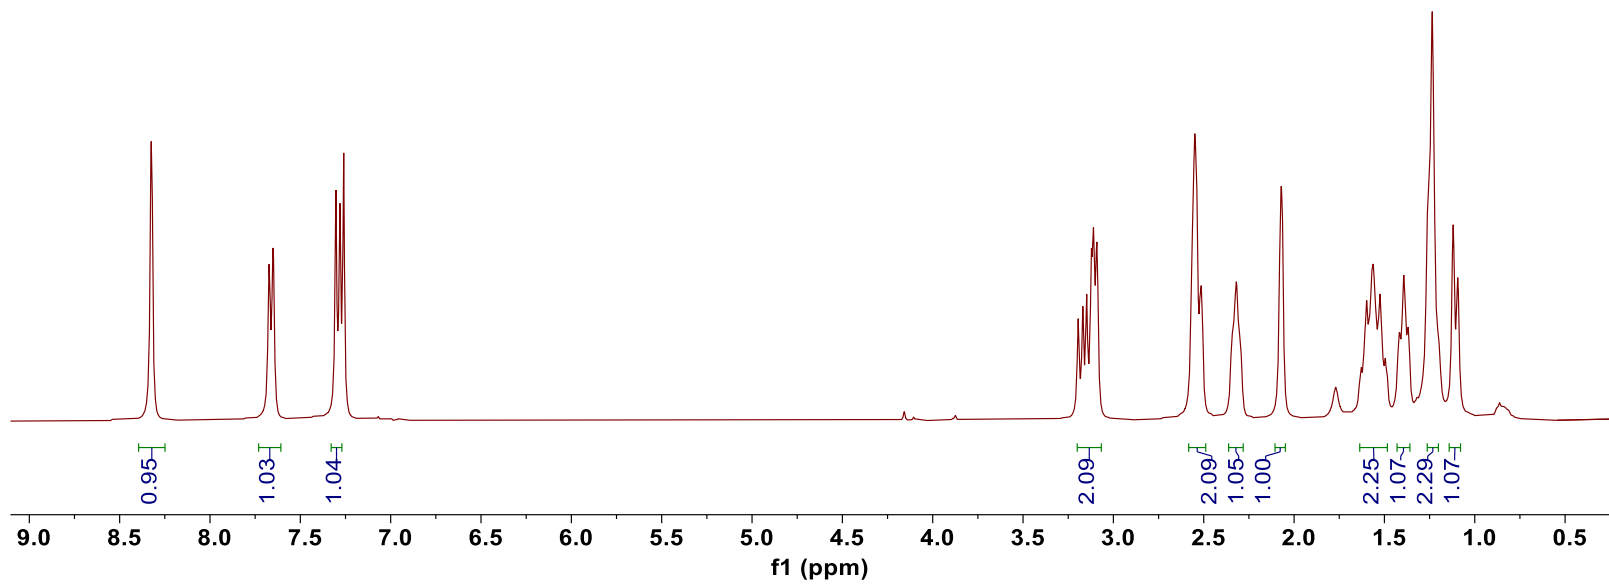

ZJK-26-2-c

— 174.98

— 170.23

— 155.76

— 135.76

— 128.58

— 125.89

— 122.63

— 119.96

— 118.28

77.48

77.16

76.84

— 49.89

42.98

40.58

39.29

38.51

32.47

28.87

28.63

$^{13}\text{C}$ -NMR (100 MHz)

Solvent:  $\text{CDCl}_3$

Scheme 2, 4j

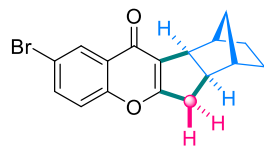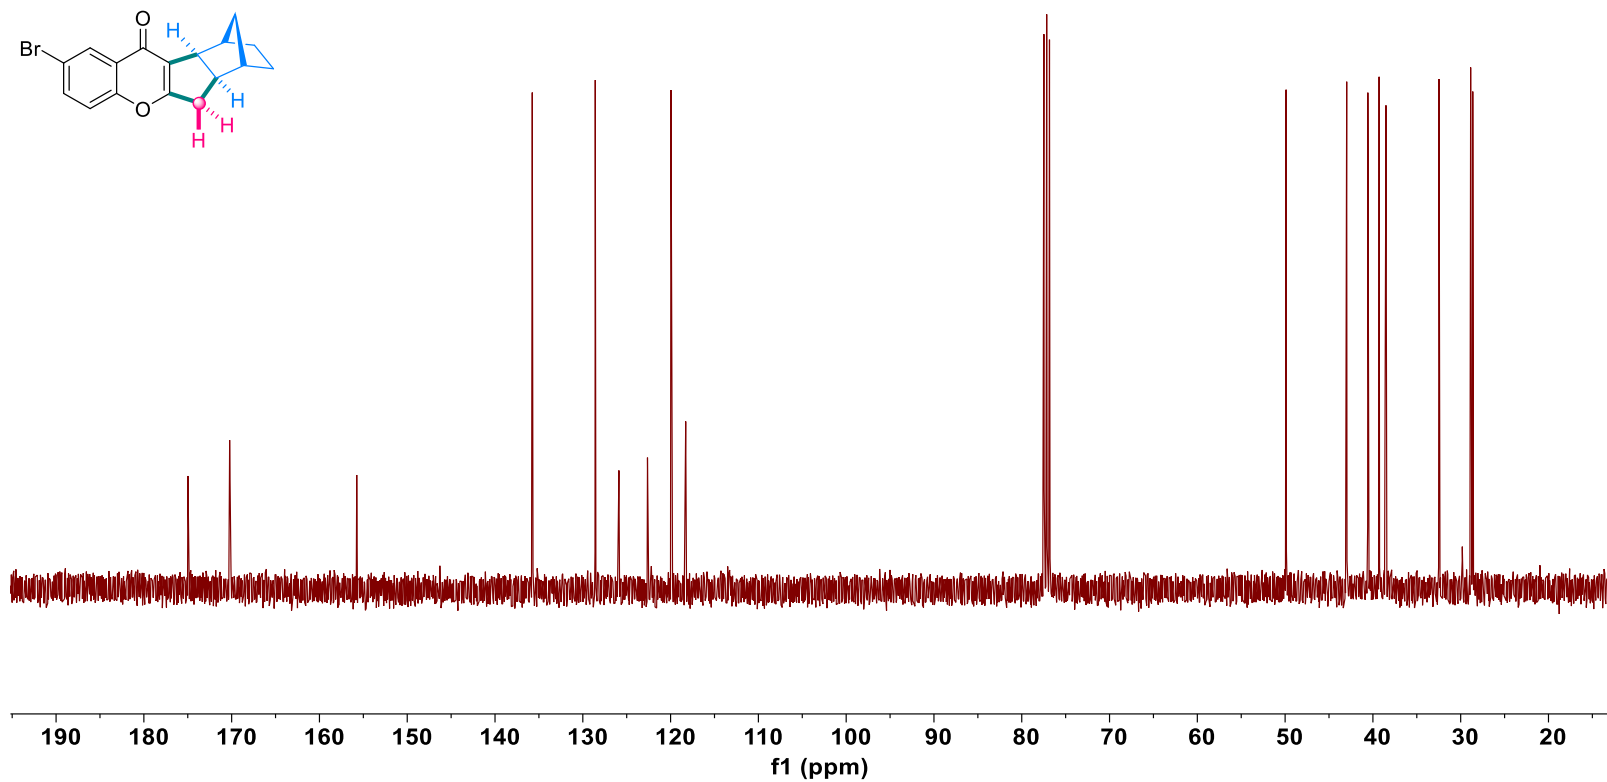

S44

ZJK-27-1-h

8.5442

7.8344

7.8293

7.8128

7.8075

7.5278

7.5062

7.2604

3.2352

3.2098

3.1877

3.1622

3.1257

3.1065

2.6093

2.6017

2.5943

2.5522

2.5458

2.5383

2.3797

2.3706

2.3525

2.3338

2.3245

2.1010

2.0909

1.6584

1.6508

1.6407

1.6306

1.6216

1.6106

1.5996

1.5922

1.5827

1.5742

1.5667

1.5578

1.5481

1.5382

1.5274

1.5085

1.4979

1.4276

1.4202

1.3882

1.3917

1.3716

1.3641

1.3158

1.3040

1.2670

1.2402

1.2104

1.1459

1.1197

<sup>1</sup>H-NMR (400 MHz)

Solvent: CDCl<sub>3</sub>

Scheme 2, 4k

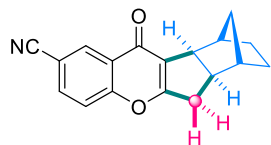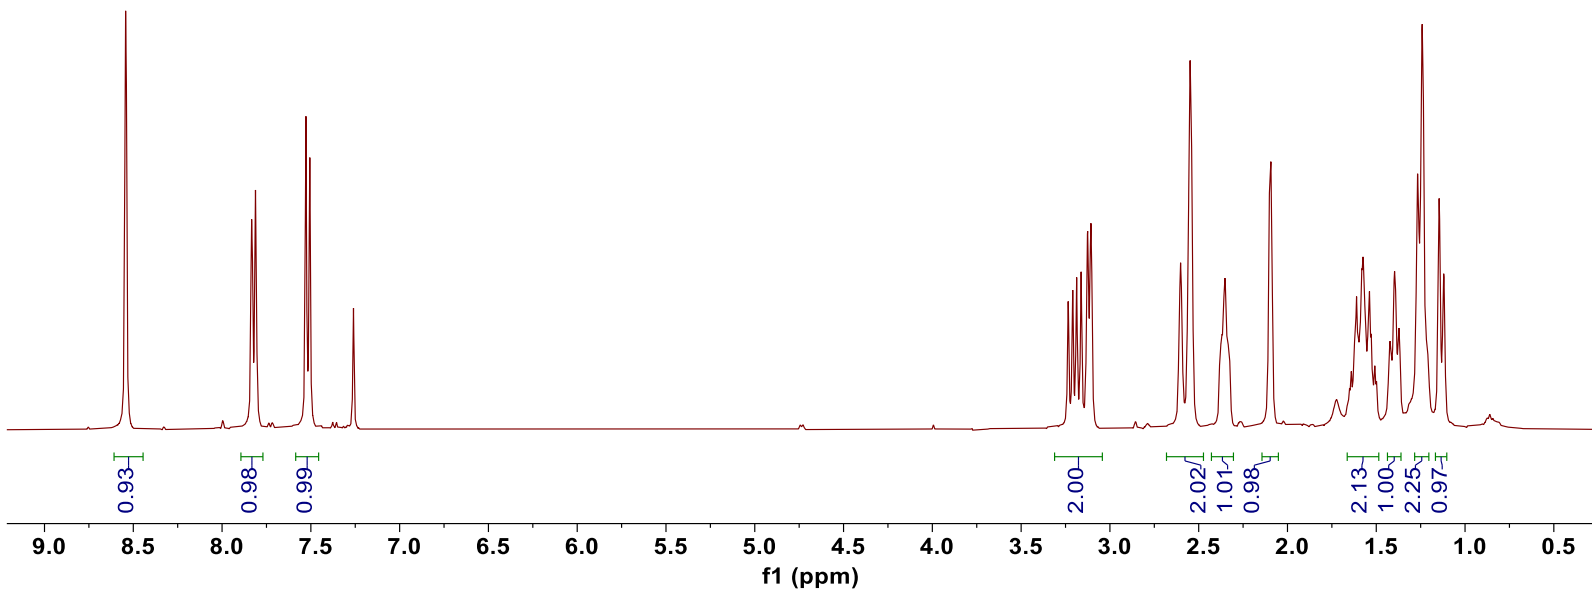

ZJK-27-1-c

— 174.38  
— 170.53

— 158.72

— 135.27  
— 131.67

— 124.97  
— 123.49  
— 119.74  
— 117.89

— 109.04

— 77.48  
— 77.16  
— 76.84

— 49.82

— 42.94  
— 40.52  
— 39.27  
— 38.49  
— 32.49  
— 28.84  
— 28.56

$^{13}\text{C}$ -NMR (100 MHz)  
Solvent:  $\text{CDCl}_3$

Scheme 2, 4k

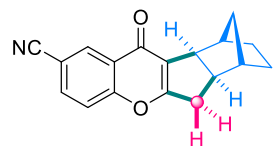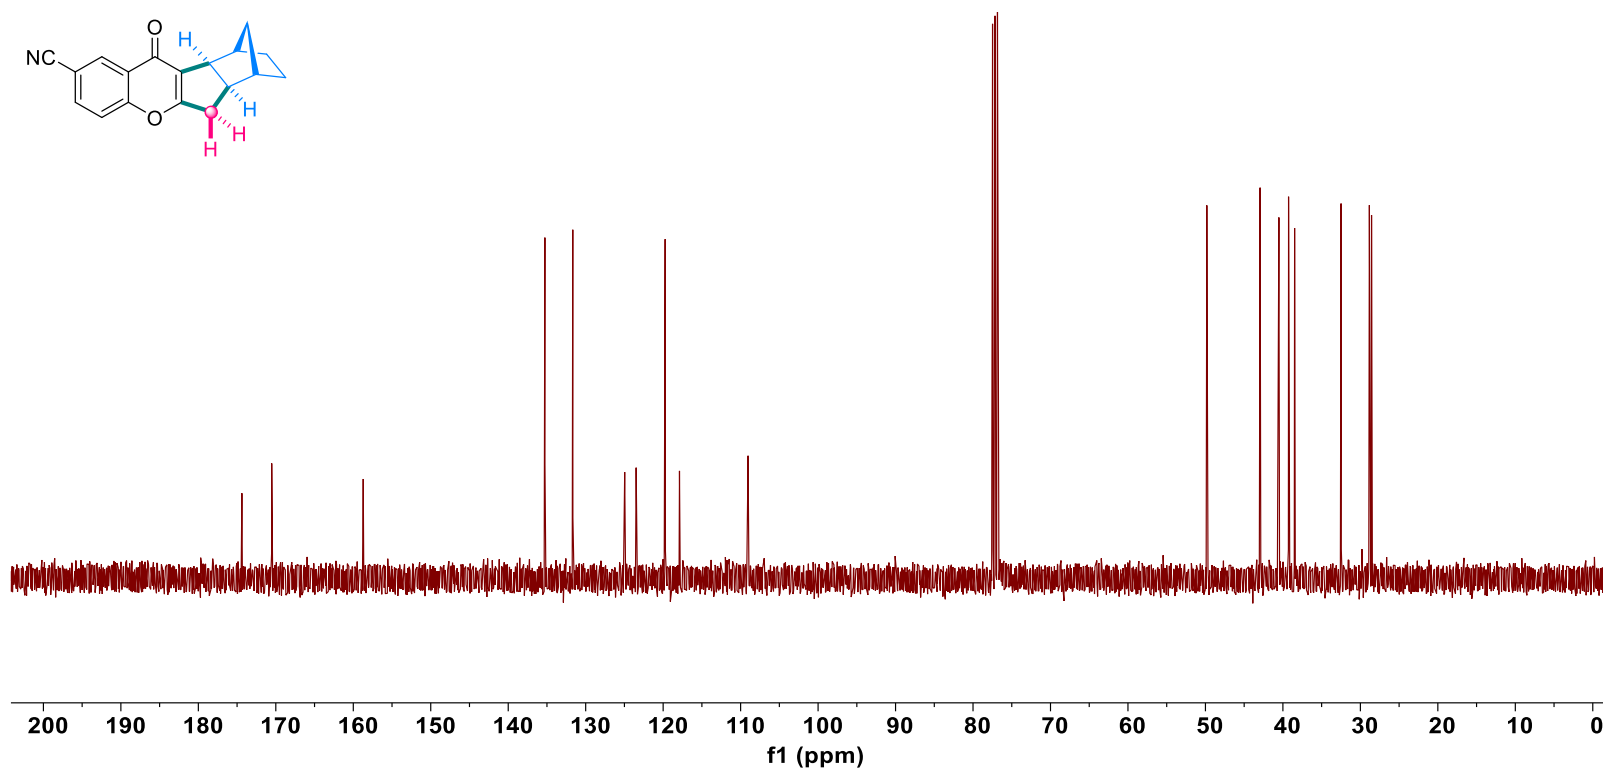

ZJK-7-2-h

8.8905  
8.8844  
8.8792  
8.8749  
8.2592  
8.2525  
8.2471  
8.2305  
8.2252  
7.4492  
7.4273  
7.2599  
3.9368  
3.2089  
3.1815  
3.1599  
3.1345  
3.1299  
3.1226  
3.1047  
2.5829  
2.5776  
2.5734  
2.5664  
2.5562  
2.5362  
2.5307  
2.5263  
2.5205  
2.3528  
2.3425  
2.3276  
2.3113  
2.0808  
2.0706  
1.6123  
1.6015  
1.5907  
1.5831  
1.5735  
1.5633  
1.5536  
1.5439  
1.5351  
1.5250  
1.5145  
1.4302  
1.4250  
1.4203  
1.4148  
1.4071  
1.3996  
1.3922  
1.3786  
1.3728  
1.3661  
1.2807  
1.2755  
1.2647  
1.2540  
1.2489  
1.2356  
1.2301  
1.2094  
1.2048  
1.1988  
1.1282  
1.1247  
1.1207  
1.1025  
1.0988  
1.0949

<sup>1</sup>H-NMR (400 MHz)  
Solvent: CDCl<sub>3</sub>

Scheme 2, 4l

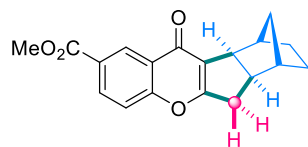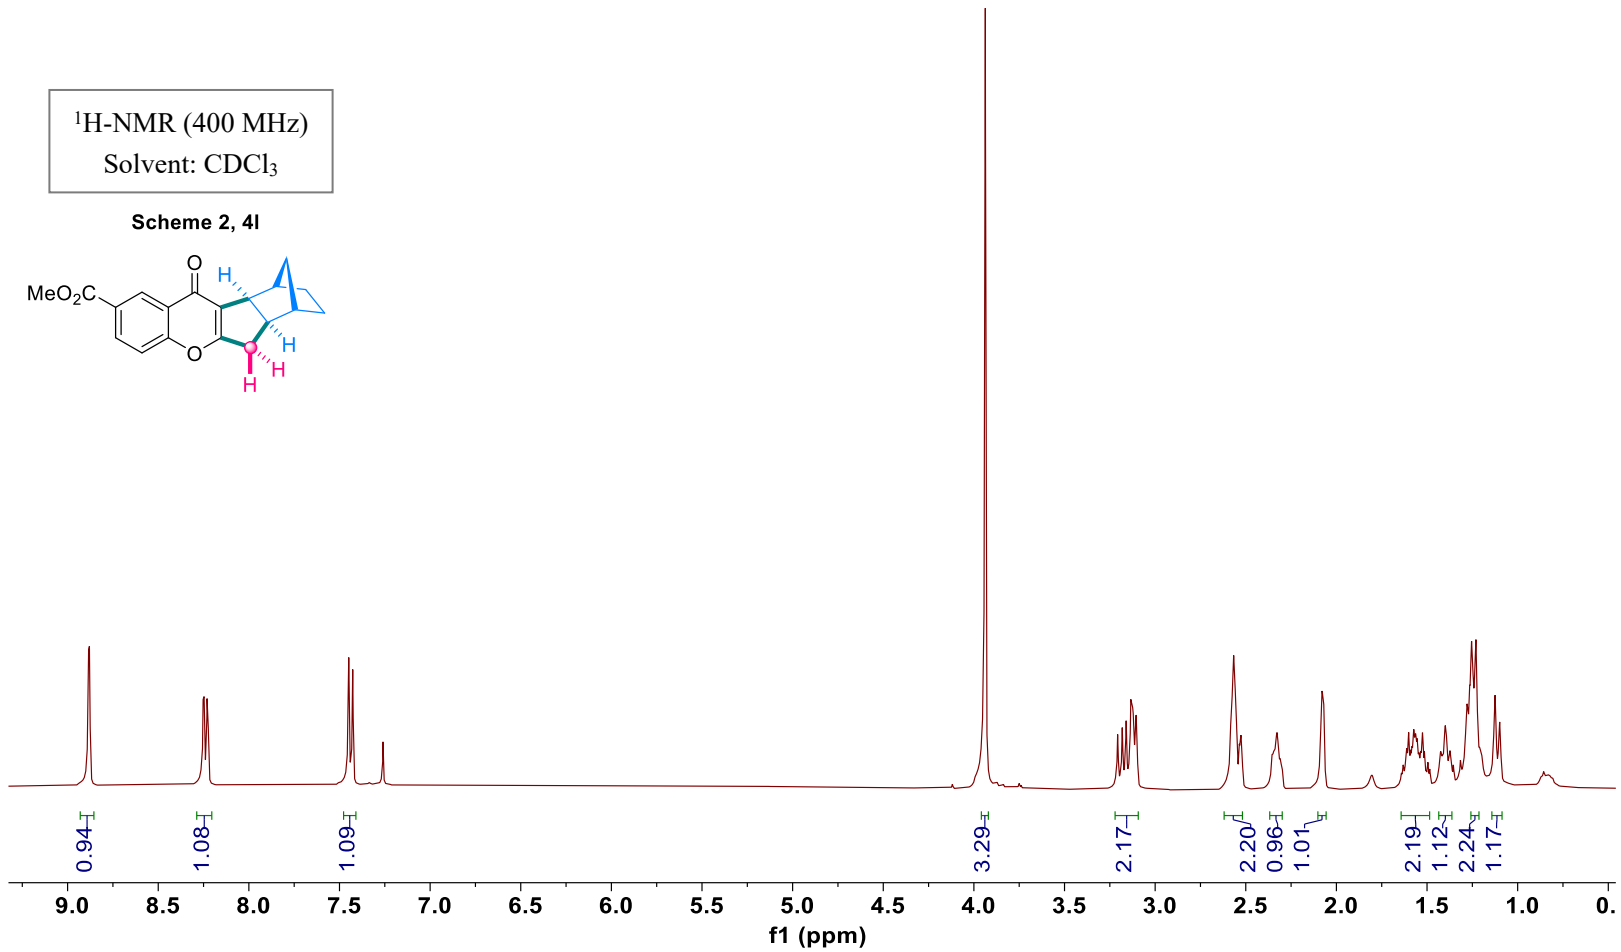



ZJK-7-2-C

— 175.69  
— 170.07  
— 166.08  
— 159.46

— 133.59  
— 128.48  
— 126.93  
— 124.21  
— 123.03  
— 118.47

— 77.48  
— 77.16  
— 76.84

— 52.50  
— 49.86  
— 42.99  
— 40.58  
— 39.29  
— 38.47  
— 32.48  
— 28.88  
— 28.62

<sup>13</sup>C-NMR (100 MHz)  
Solvent: CDCl<sub>3</sub>

Scheme 2, 4I

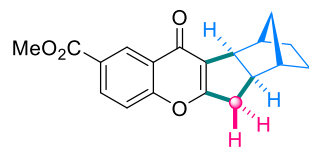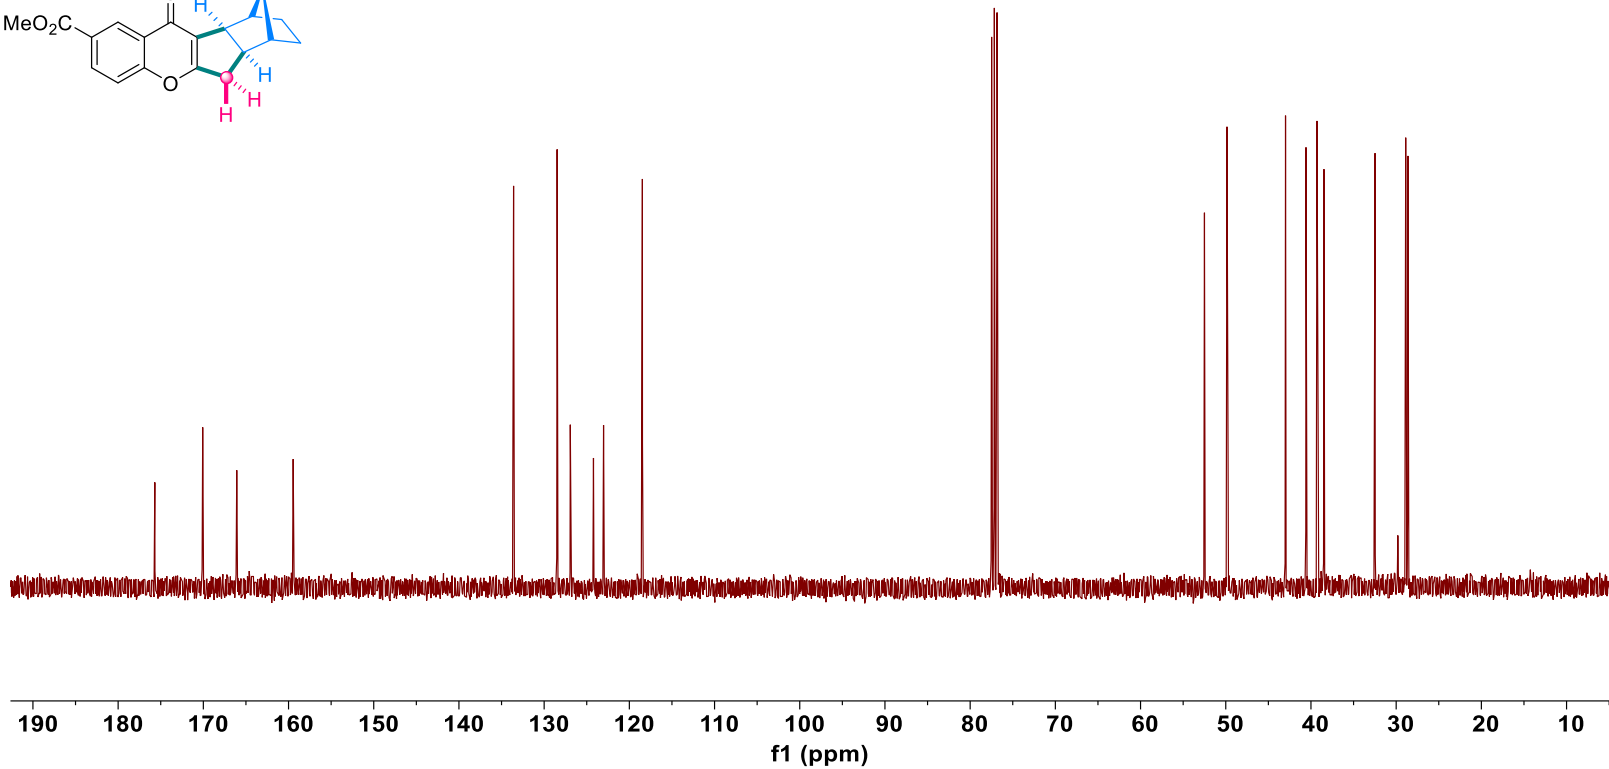

ZJK-27-2-h

<sup>1</sup>H-NMR (400 MHz)

Solvent: CDCl<sub>3</sub>

Scheme 2, 4m

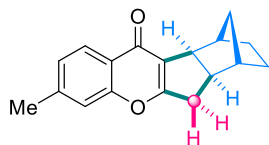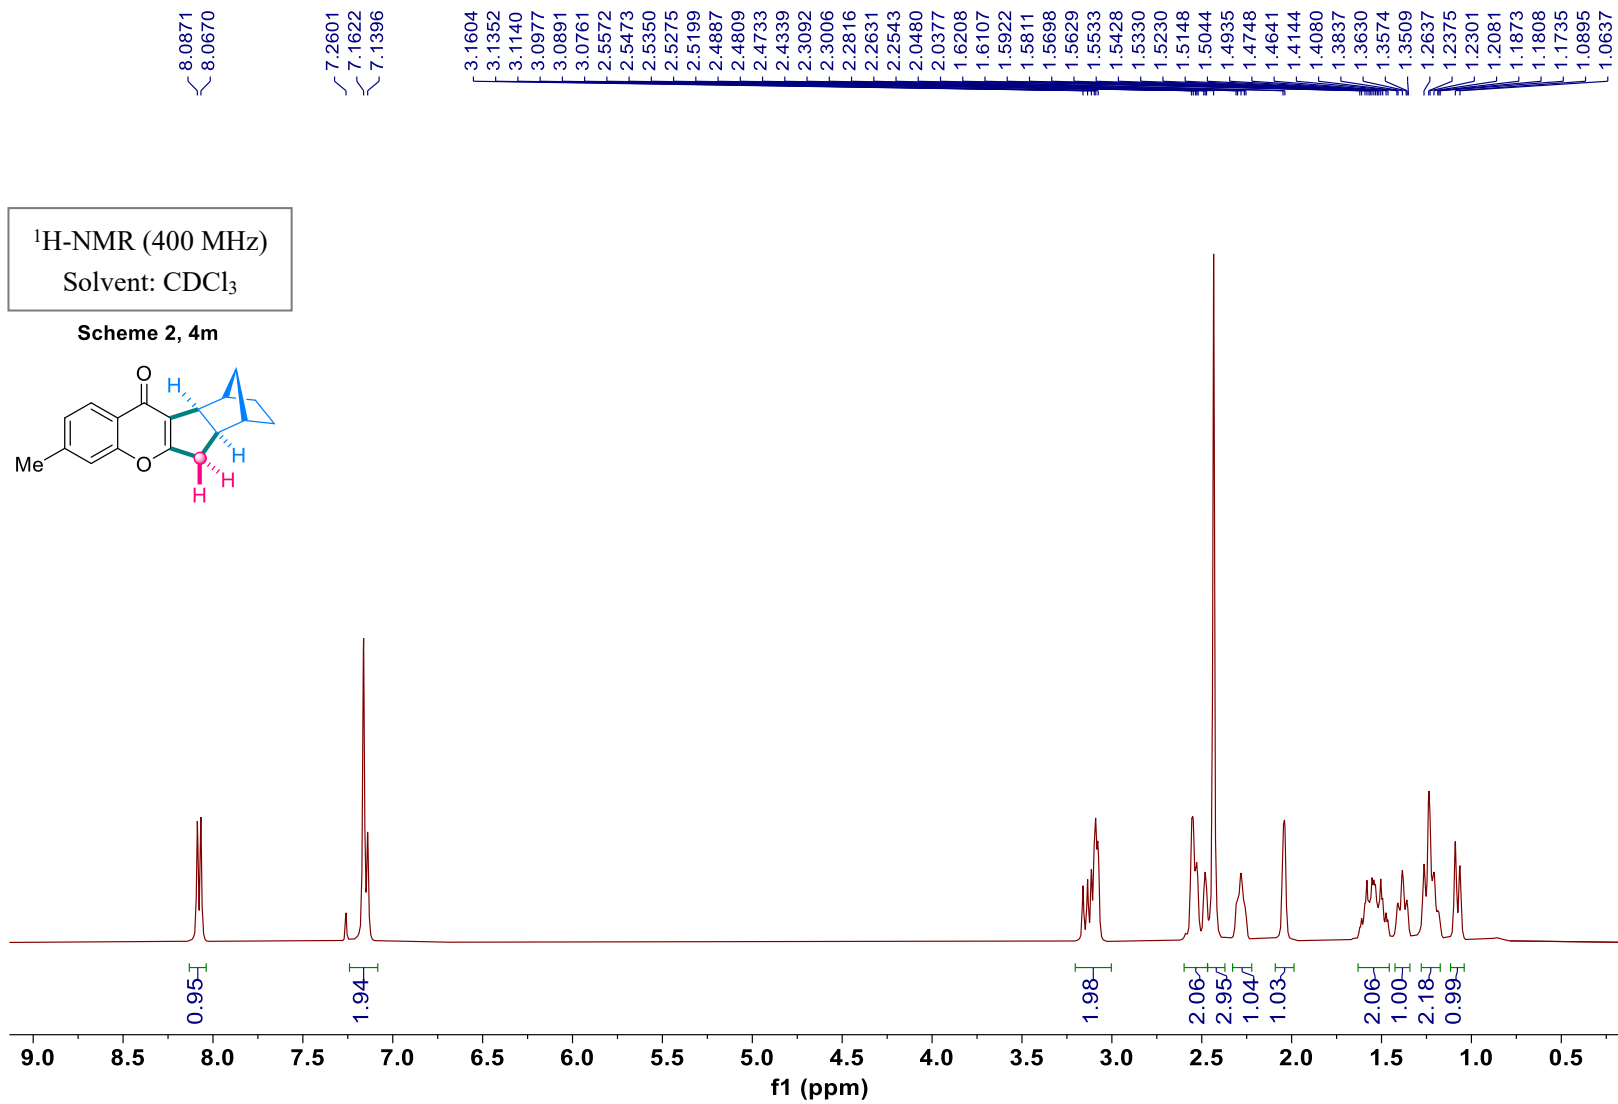

ZJK-27-2-C

— 176.37

— 169.51

— 157.12

— 143.98

— 126.26

— 125.59

— 122.17

— 122.15

— 117.76

— 77.48

— 77.16

— 76.84

— 49.88

— 42.96

— 40.54

— 39.29

— 38.46

— 32.41

— 28.86

— 28.65

— 21.77

<sup>13</sup>C-NMR (100 MHz)  
Solvent: CDCl<sub>3</sub>

Scheme 2, 4m

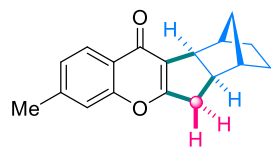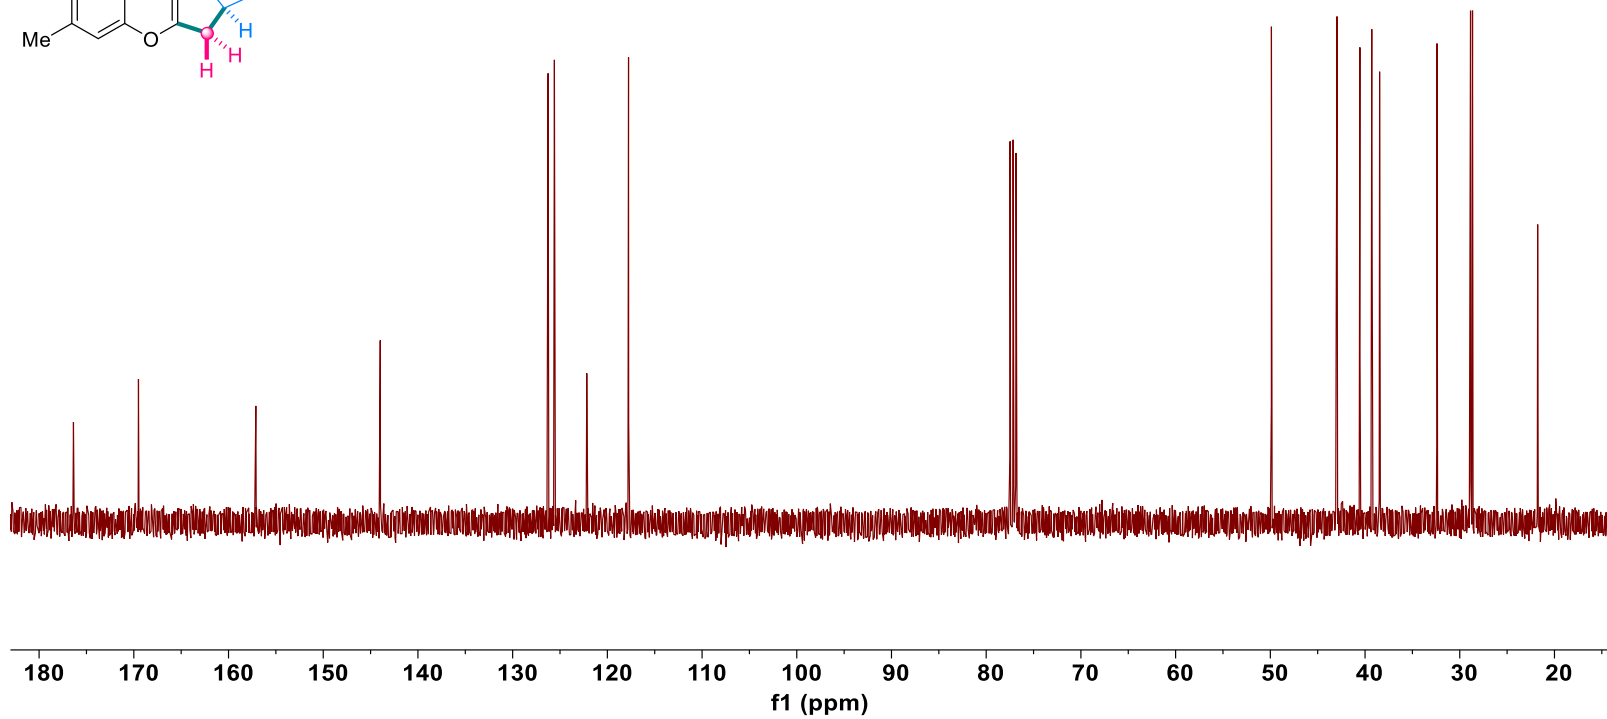

ZJK-28-1-h

<sup>1</sup>H-NMR (400 MHz)  
Solvent: CDCl<sub>3</sub>

Scheme 2, 4n

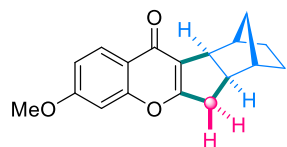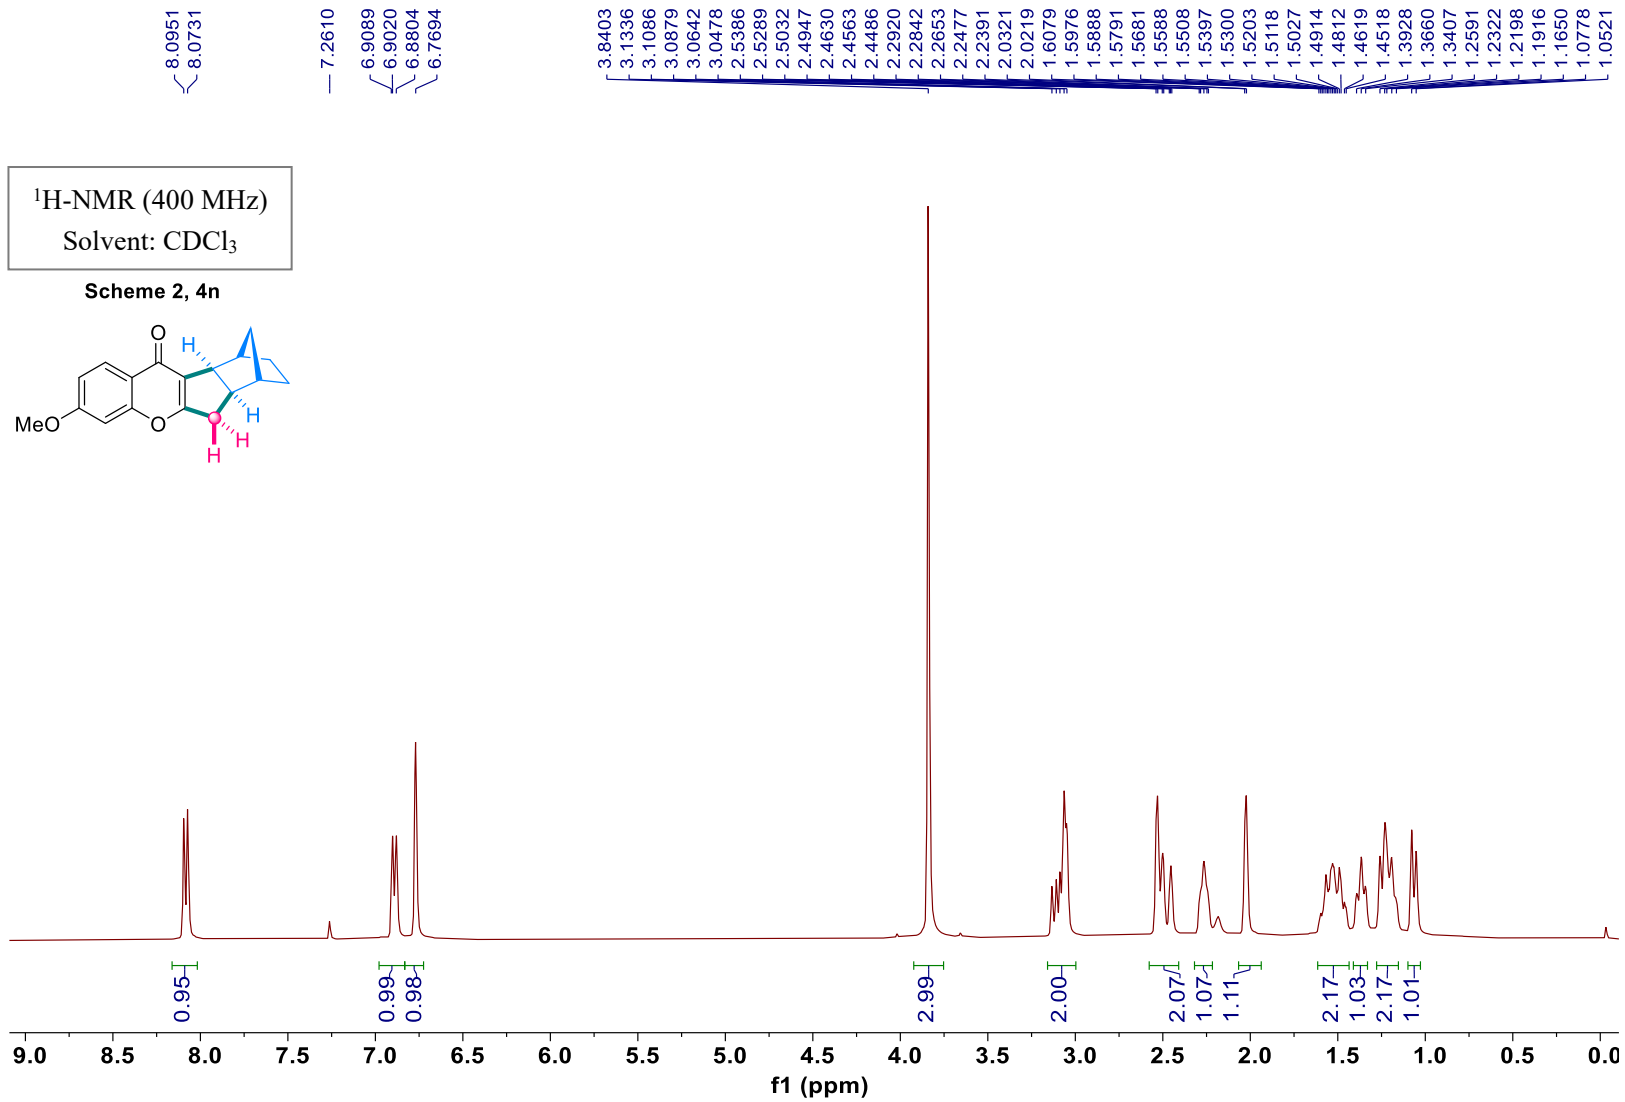

ZJK-28-1-C

— 175.98

— 169.16

— 163.42

— 158.66

— 127.10

— 122.07

— 118.28

— 113.70

— 100.50

— 77.50

— 77.18

— 76.86

— 55.82

— 49.84

— 42.95

— 40.62

— 39.31

— 38.37

— 32.39

— 28.87

— 28.65

$^{13}\text{C}$ -NMR (100 MHz)  
Solvent:  $\text{CDCl}_3$

Scheme 2, 4n

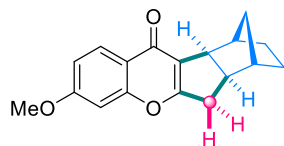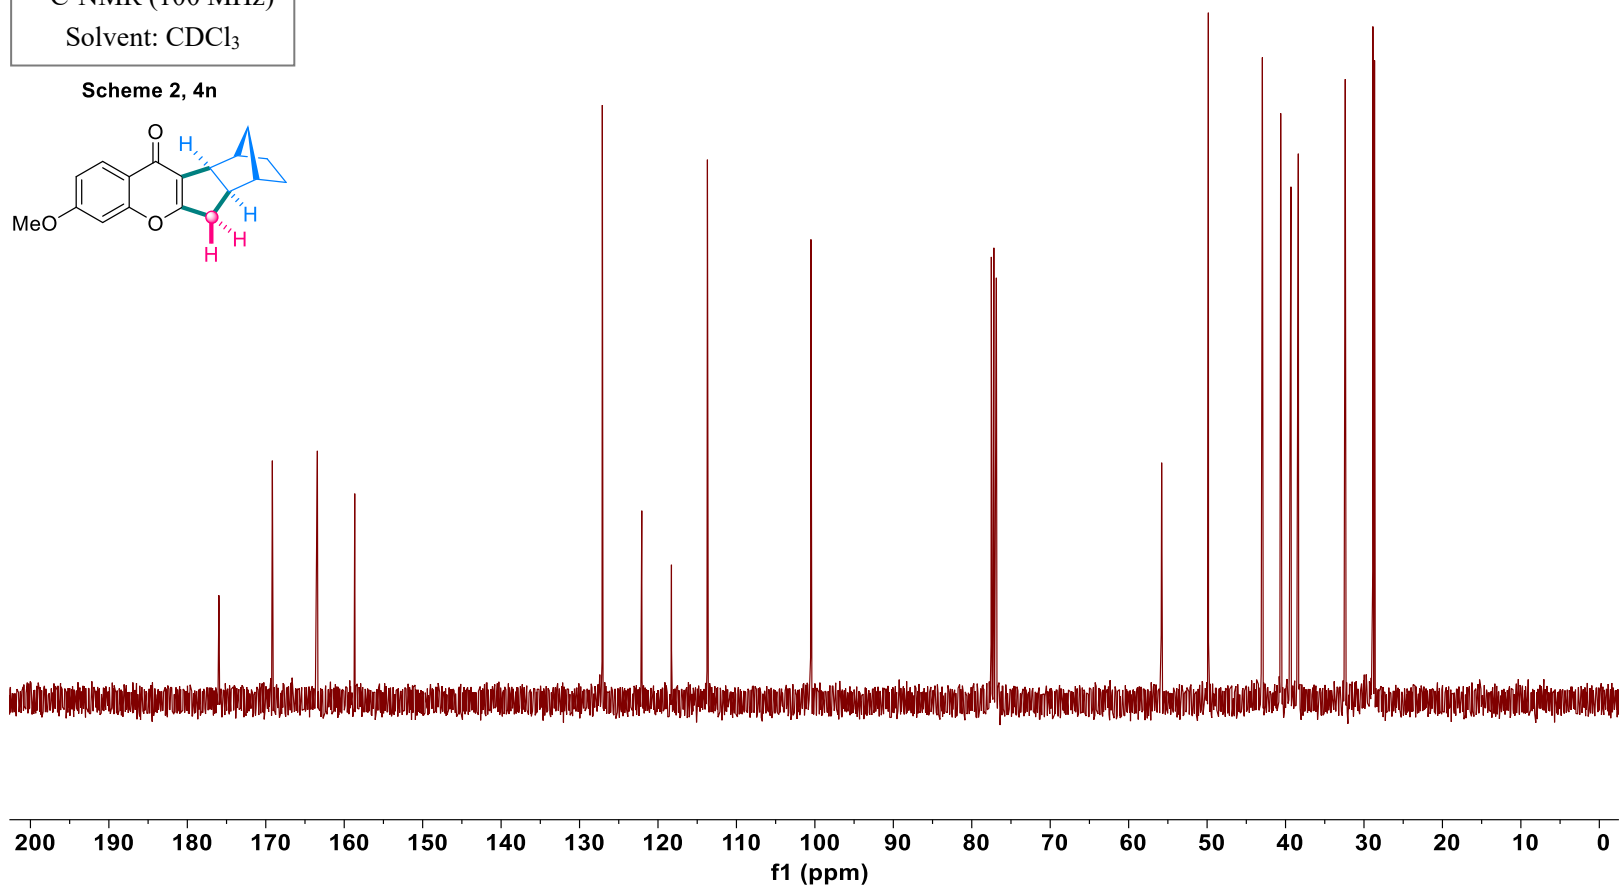

ZJK-28-2-h

8.2256  
8.2084  
8.2014  
8.1866

7.2605  
7.0988  
7.0932  
7.0792  
7.0744  
7.0541

3.1770  
3.1516  
3.1302  
3.1040  
3.0937  
3.0751  
2.5516  
2.5449  
2.5363  
2.5050  
2.4974  
2.4899  
2.3334  
2.3239  
2.3062  
2.2876  
2.2784  
2.0630  
2.0527  
1.6271  
1.6167  
1.6037  
1.5975  
1.5867  
1.5752  
1.5681  
1.5589  
1.5491  
1.5401  
1.5302  
1.5219  
1.5116  
1.5008  
1.4819  
1.4919  
1.4712  
1.4107  
1.4057  
1.3830  
1.3617  
1.3560  
1.3502  
1.2723  
1.2668  
1.2417  
1.2242  
1.2172  
1.2106  
1.1943  
1.1882  
1.1835  
1.1785  
1.1094  
1.0834

<sup>1</sup>H-NMR (400 MHz)

Solvent: CDCl<sub>3</sub>

Scheme 2, 4o

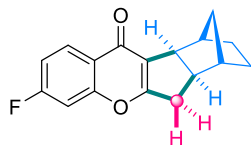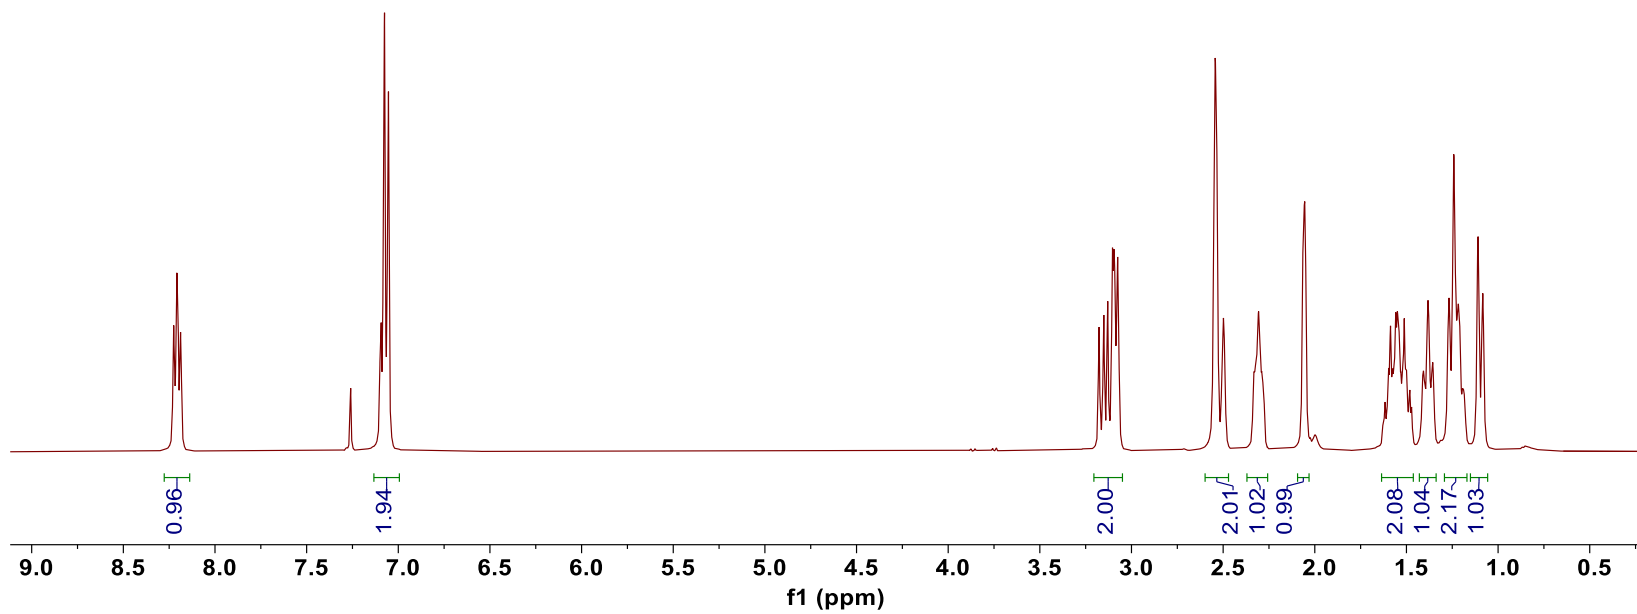

ZJK-28-2-C

175.51  
170.00  
166.37  
163.85  
157.93  
157.81

128.27  
128.17  
122.50  
121.31  
121.28  
113.55  
113.33  
104.81  
104.56

77.48  
77.16  
76.84

49.78  
42.94  
40.59  
39.28  
38.40  
32.43  
28.85  
28.61

<sup>13</sup>C-NMR (100 MHz)  
Solvent: CDCl<sub>3</sub>

Scheme 2, 4o

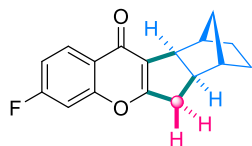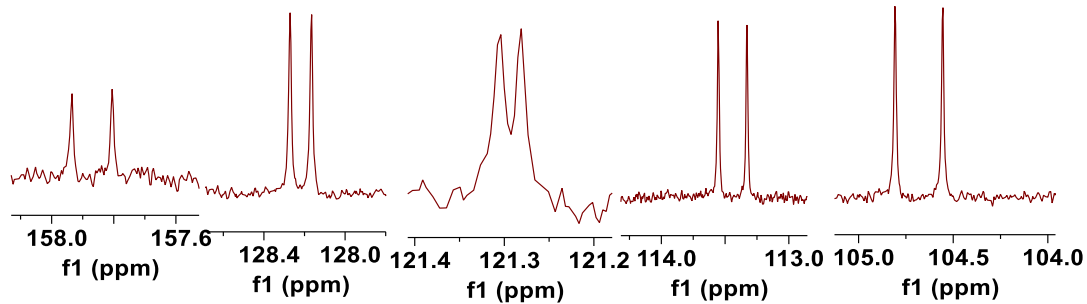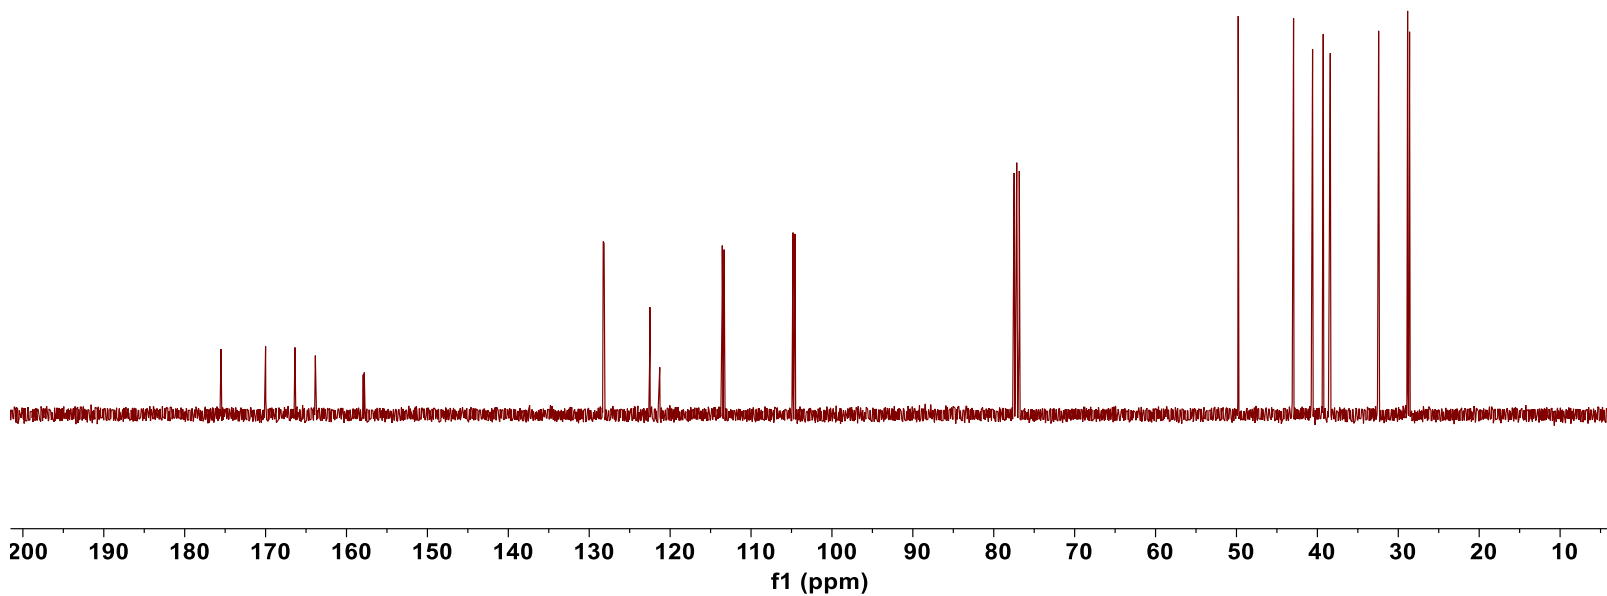

ZJK-29-1-h

8.0527  
8.0317  
7.5507  
7.4544  
7.4333  
7.2605

3.1594  
3.1342  
3.1129  
3.0889  
3.0842  
3.0779  
3.0583  
2.5334  
2.5239  
2.4851  
2.4815  
2.3159  
2.2919  
2.2682  
2.0553  
2.0450  
2.0009  
1.6104  
1.5922  
1.5802  
1.5650  
1.5531  
1.5445  
1.5349  
1.5263  
1.5170  
1.5056  
1.4961  
1.4756  
1.4652  
1.3989  
1.3712  
1.3454  
1.2484  
1.2224  
1.2033  
1.1821  
1.1742  
1.0997  
1.0736

<sup>1</sup>H-NMR (400 MHz)

Solvent: CDCl<sub>3</sub>

Scheme 2, 4p

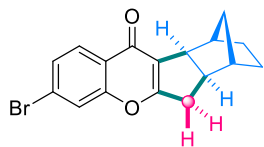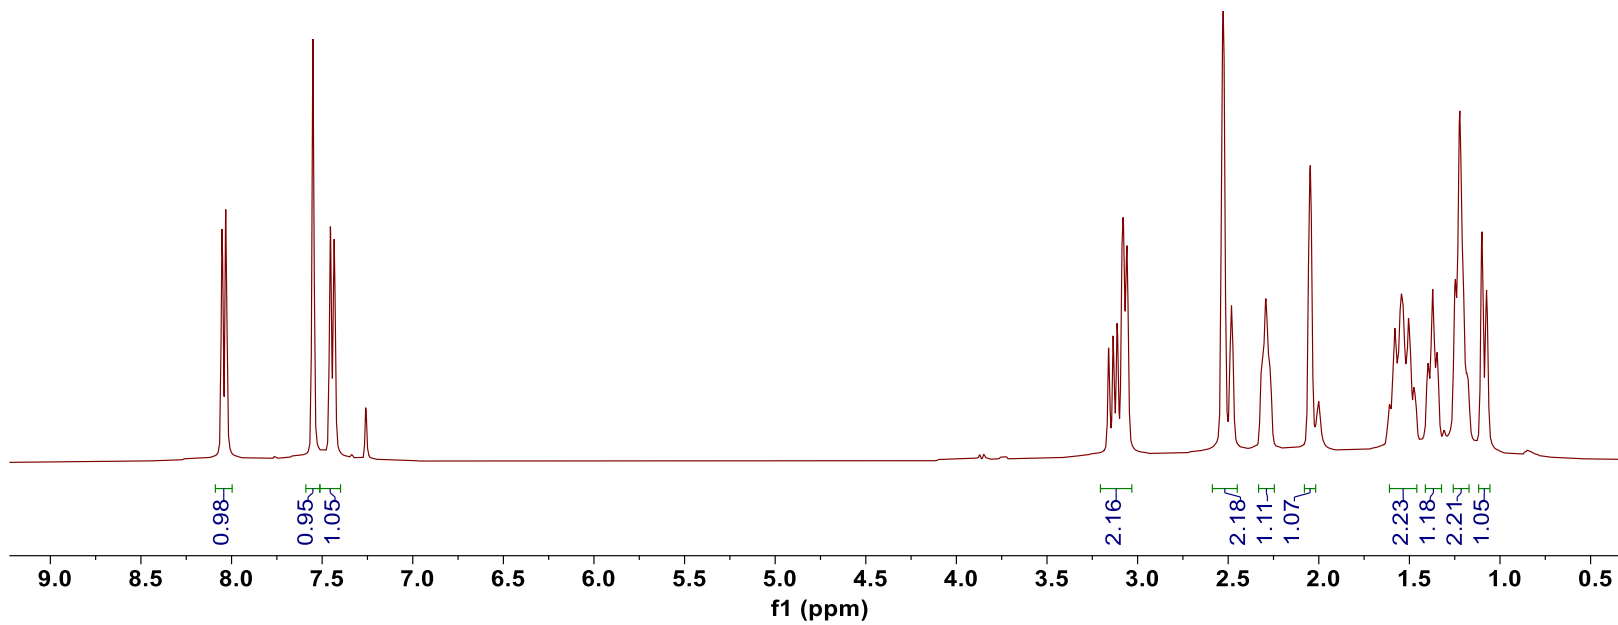



ZJK-29-1-C

— 175.55

— 169.87

— 156.99

128.38

127.29

126.86

123.37

122.74

121.08

77.48

77.16

76.84

— 49.84

42.93

40.53

39.25

38.43

32.42

28.83

28.59

$^{13}\text{C}$ -NMR (100 MHz)  
Solvent:  $\text{CDCl}_3$

Scheme 2, 4p

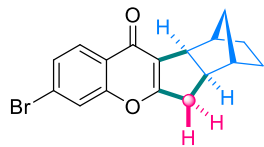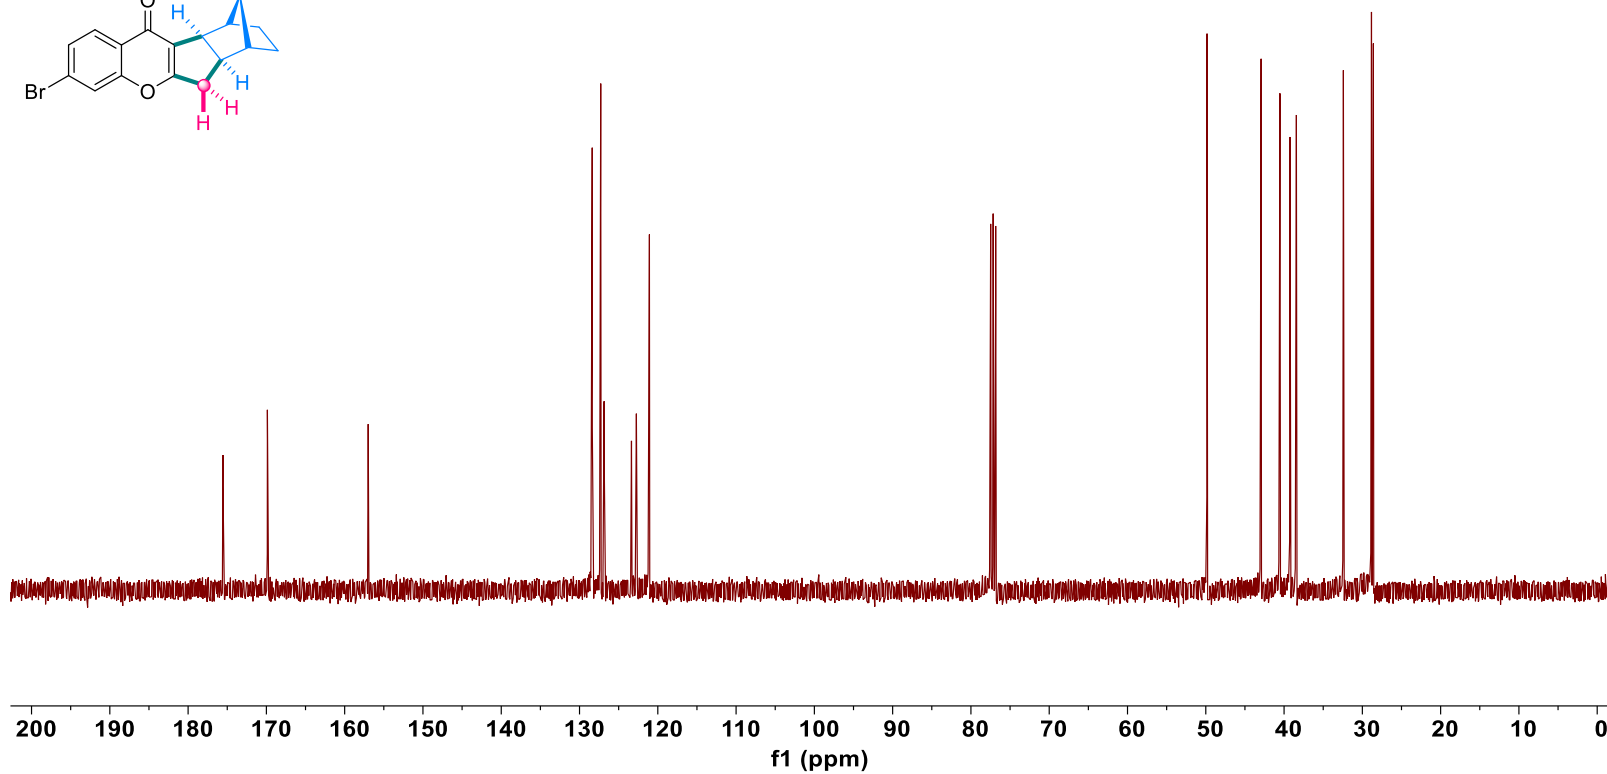

ZJK-29-2-h

8.0494  
8.0296  
7.4034  
7.3853  
7.2592  
7.2341  
7.2150  
7.1958

3.1885  
3.1633  
3.1421  
3.1171  
3.0998  
3.0799  
2.5712  
2.5628  
2.5571  
2.5520  
2.5254  
2.5216  
2.5167  
2.5096  
2.4158  
2.3120  
2.3040  
2.2864  
2.2682  
2.2588  
2.0515  
2.0413  
1.6195  
1.6091  
1.6002  
1.5906  
1.5794  
1.5695  
1.5623  
1.5515  
1.5416  
1.5320  
1.5232  
1.5145  
1.5035  
1.4934  
1.4737  
1.4641  
1.4081  
1.3810  
1.3580  
1.3513  
1.2688  
1.2629  
1.2371  
1.2078  
1.1834  
1.1765  
1.0865  
1.0606

<sup>1</sup>H-NMR (400 MHz)

Solvent: CDCl<sub>3</sub>

Scheme 2, 4q

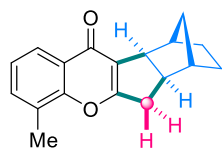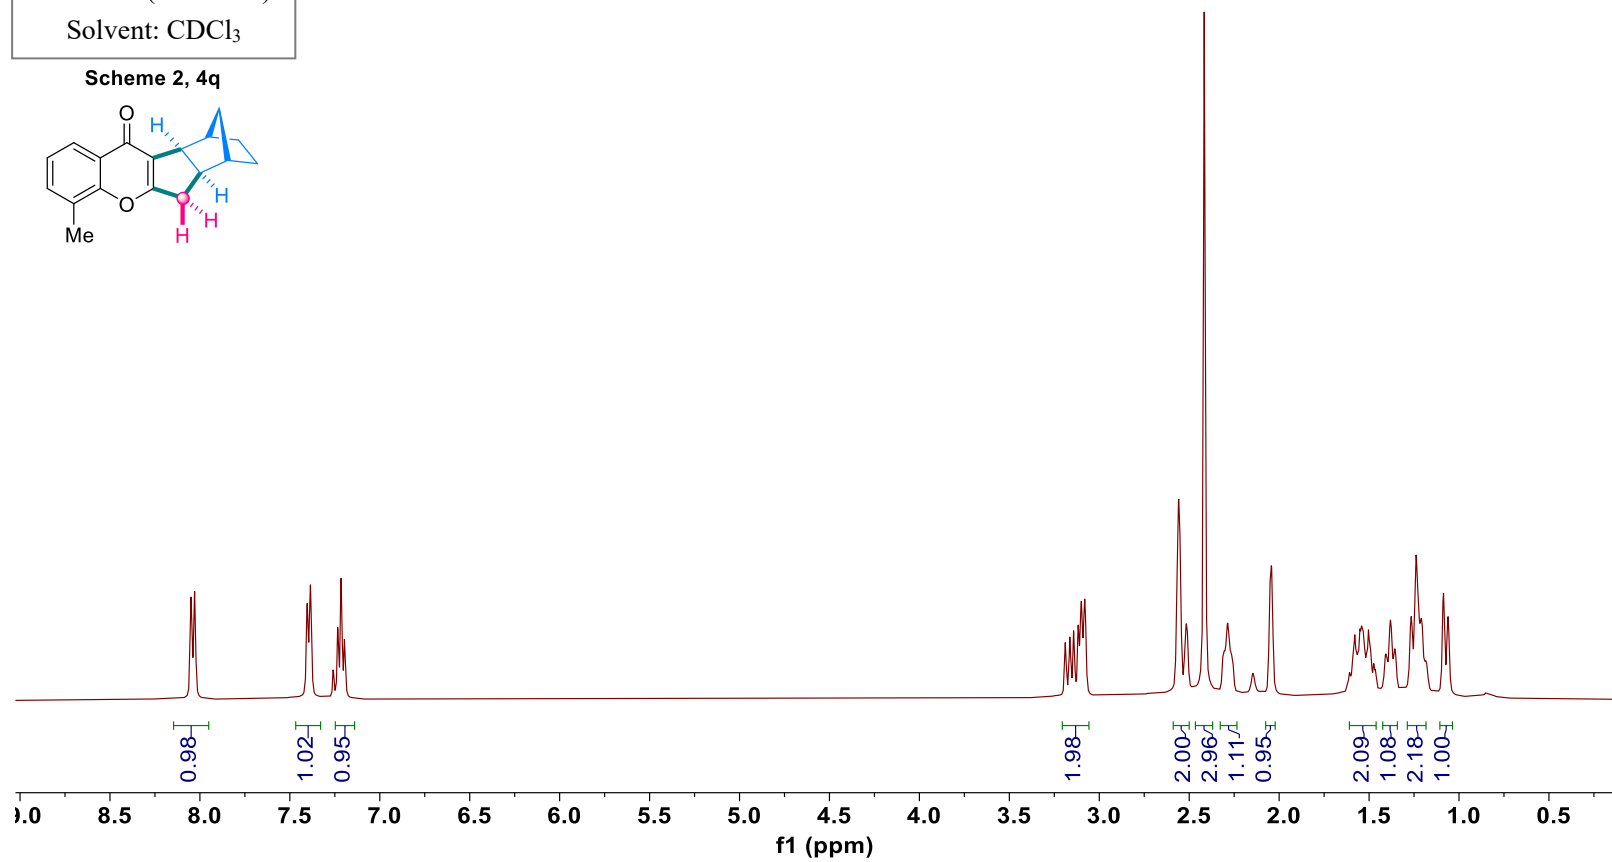

ZJK-29-2-C

— 176.65  
— 169.56  
— 155.45  
— 133.80  
— 127.28  
— 124.28  
— 124.24  
— 123.44  
— 122.07  
— 77.48  
— 77.16  
— 76.84  
— 49.89  
— 42.96  
— 40.53  
— 39.25  
— 38.54  
— 32.39  
— 28.84  
— 28.64  
— 15.73

$^{13}\text{C}$ -NMR (100 MHz)

Solvent:  $\text{CDCl}_3$

Scheme 2, 4q

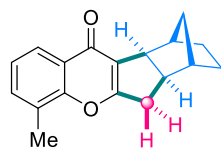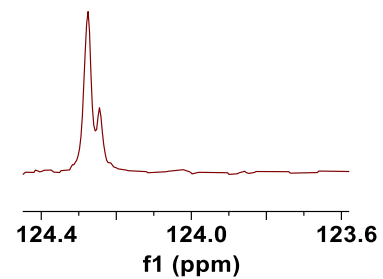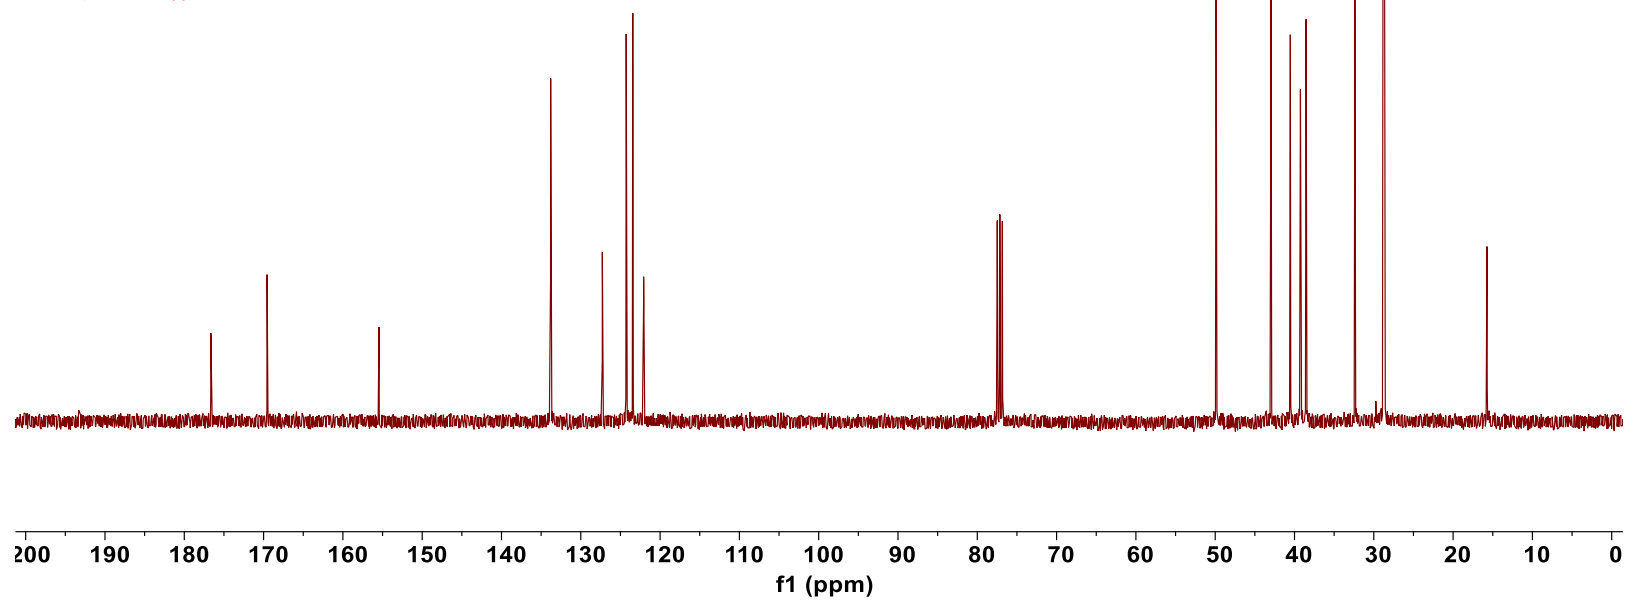

ZJK-30-1-h

8.1166  
8.0967

7.6448  
7.6256

7.2982  
7.2773  
7.2594

3.2556  
3.2303  
3.2087  
3.1828  
3.1151  
3.0957  
2.6419  
2.6342  
2.6262  
2.5946  
2.5866  
2.5792  
2.5578  
2.5479  
2.3595  
2.3502  
2.3319  
2.3141  
2.3039  
2.0849  
2.0746  
2.0443  
1.6407  
1.6299  
1.6207  
1.6115  
1.6004  
1.5903  
1.5826  
1.5722  
1.5621  
1.5521  
1.5433  
1.5347  
1.5237  
1.5133  
1.4939  
1.4836  
1.4204  
1.4117  
1.3948  
1.3889  
1.3691  
1.2844  
1.2566  
1.2329  
1.2253  
1.2018  
1.1944  
1.1207  
1.0946

<sup>1</sup>H-NMR (400 MHz)  
Solvent: CDCl<sub>3</sub>

Scheme 2, 4r

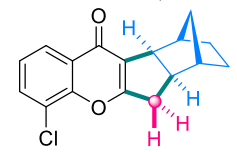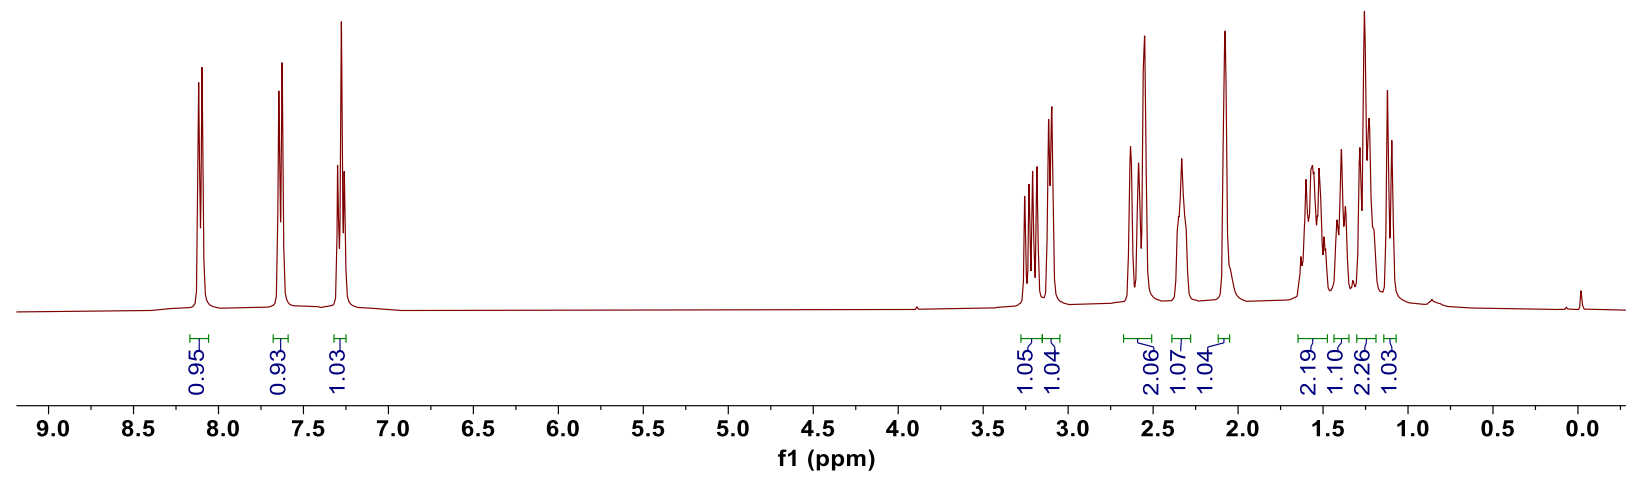

ZJK-30-1-C

— 175.54

— 169.87

— 152.59

— 133.18

— 125.89

— 124.87

— 124.55

— 122.94

— 122.68

— 77.48

— 77.16

— 76.84

— 49.82

— 42.95

— 40.55

— 39.23

— 38.46

— 32.42

— 28.84

— 28.59

<sup>13</sup>C-NMR (100 MHz)  
Solvent: CDCl<sub>3</sub>

Scheme 2, 4r

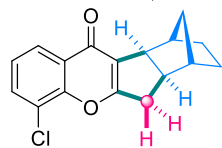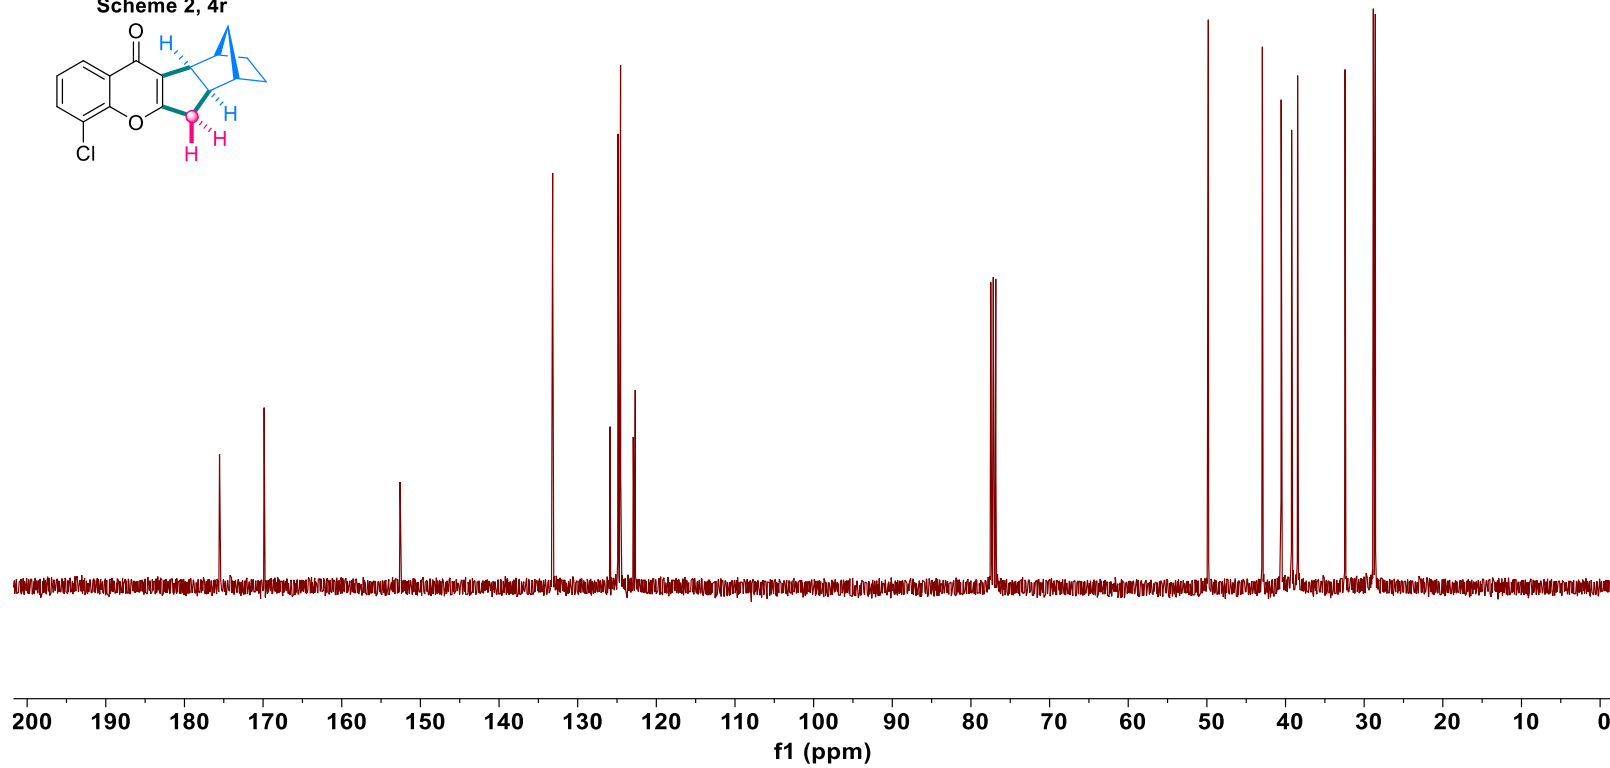

ZJK-34-1-h

8.5126  
8.5082  
8.4928  
8.4884  
8.2331  
8.2287  
8.2133  
8.2090  
7.4965  
7.4766  
7.4569  
7.2600  
3.2778  
3.2523  
3.2299  
3.2045  
3.1405  
3.1211  
2.6679  
2.6617  
2.6580  
2.6520  
2.6199  
2.6139  
2.6102  
2.6042  
2.5605  
2.5503  
2.3990  
2.3798  
2.3751  
2.3699  
2.3649  
2.1176  
2.1073  
1.6301  
1.6194  
1.6086  
1.6008  
1.5915  
1.5841  
1.5816  
1.5744  
1.5712  
1.5639  
1.5552  
1.5450  
1.5343  
1.5150  
1.4119  
1.4076  
1.4042  
1.3981  
1.3787  
1.2848  
1.2760  
1.2699  
1.2641  
1.2578  
1.2514  
1.2464  
1.2410  
1.2363  
1.2286  
1.2228  
1.2172  
1.1610  
1.1572  
1.1534  
1.1350  
1.1311  
1.1273

<sup>1</sup>H-NMR (400 MHz)

Solvent: CDCl<sub>3</sub>

Scheme 2, 4s

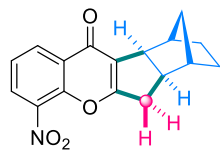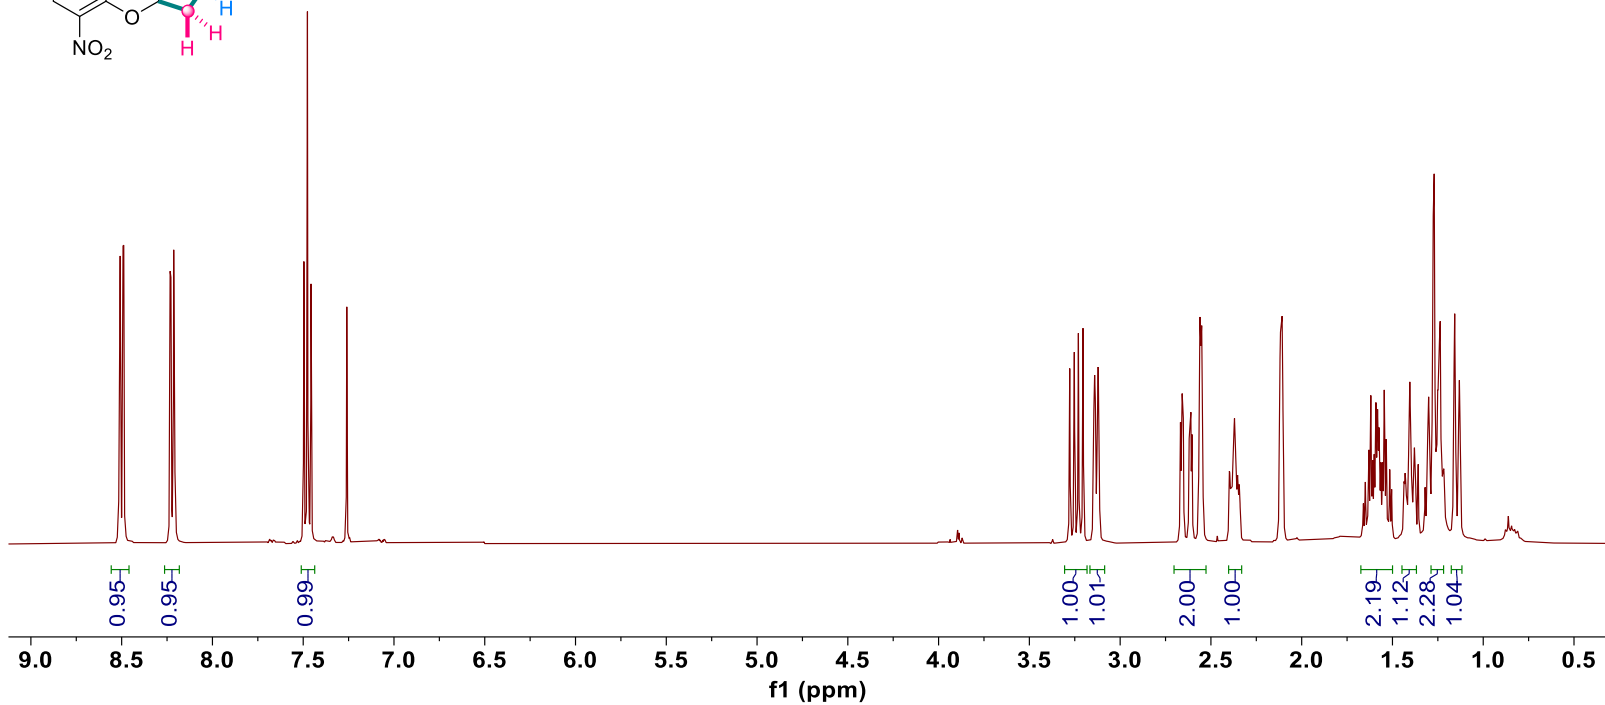

ZJK-34-1-C

— 174.23  
— 170.19

— 149.11

— 139.23

↘ 131.75  
↘ 128.90  
↘ 126.42  
↘ 124.13  
↘ 123.48

↘ 77.48  
↘ 77.16  
↘ 76.84

— 49.81

↘ 42.96  
↘ 40.61  
↘ 39.29  
↘ 38.53  
↘ 32.53  
↘ 28.88  
↘ 28.58

$^{13}\text{C-NMR}$  (100 MHz)

Solvent:  $\text{CDCl}_3$

Scheme 2, 4s

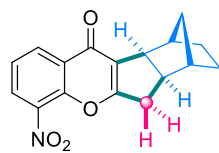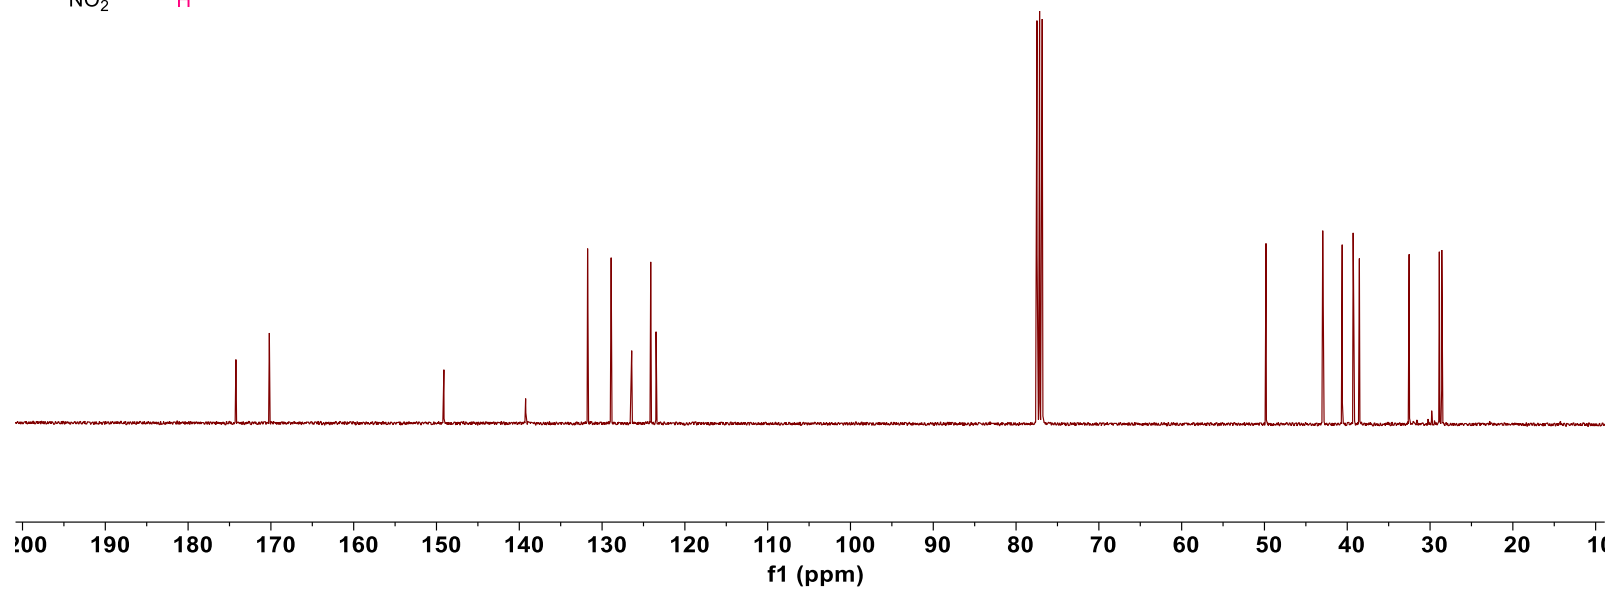

ZJK-31-1-h

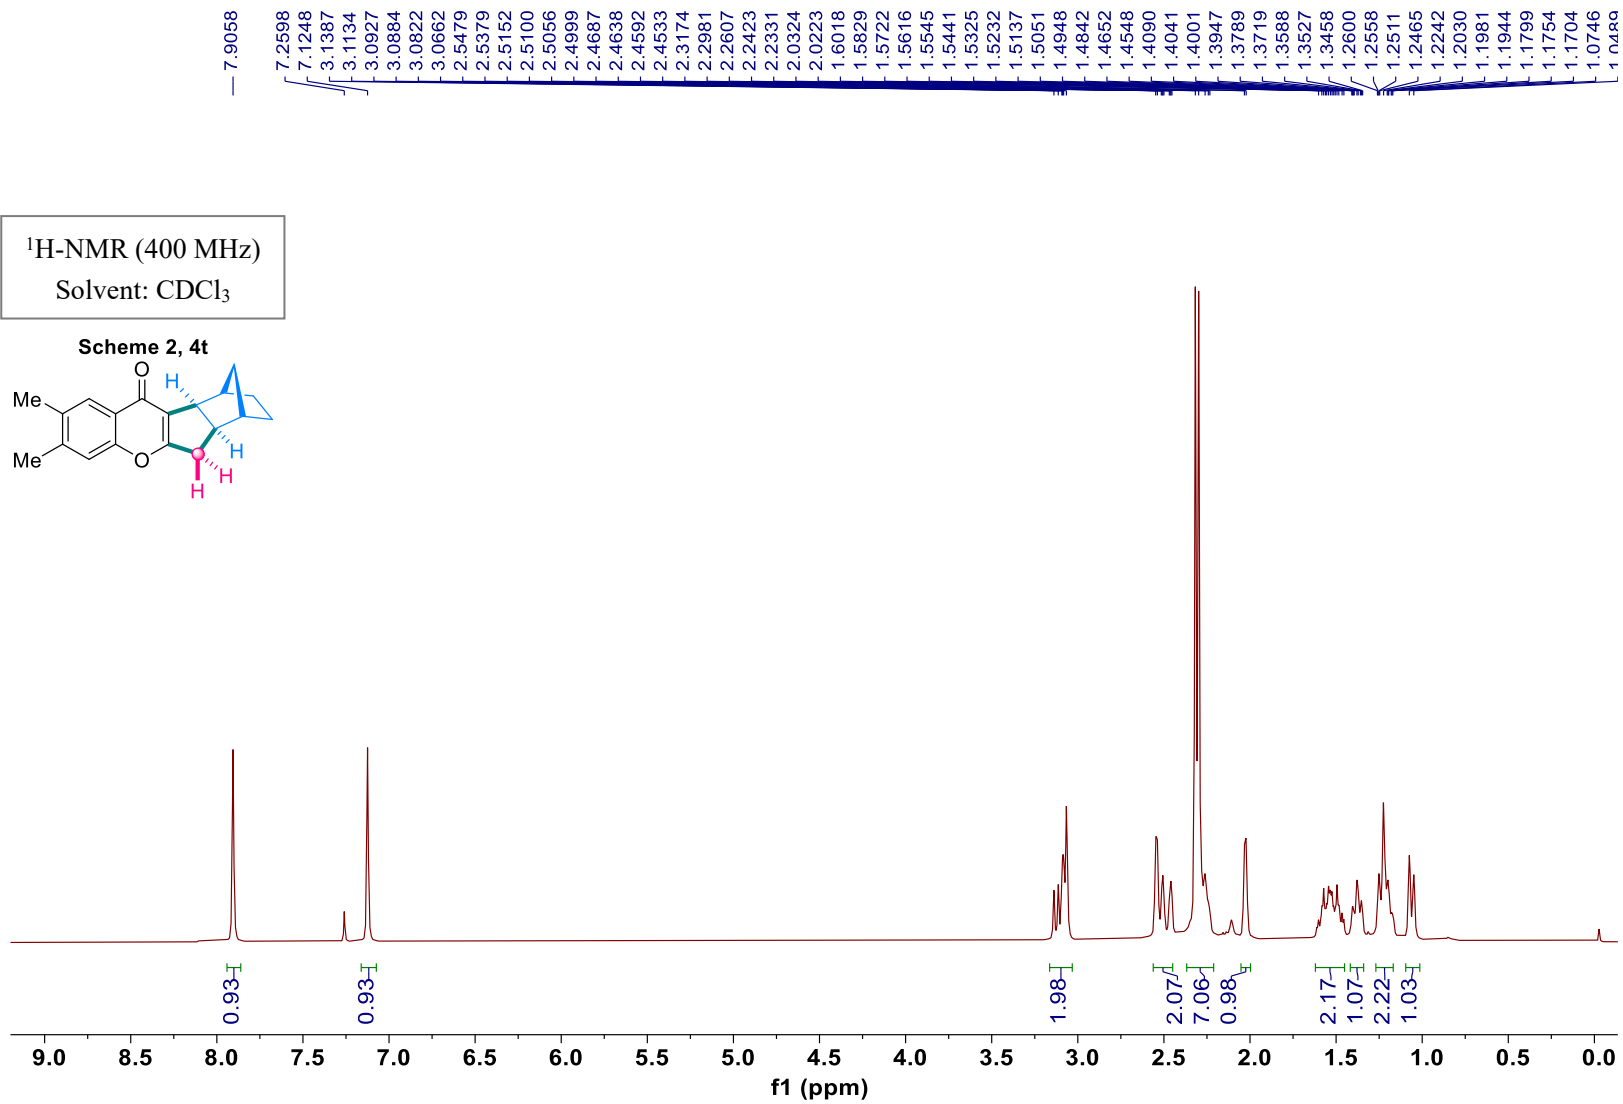



ZJK-31-1-C

176.42  
169.31  
155.50  
142.96  
133.85  
125.47  
122.19  
121.99  
118.08  
77.48  
77.16  
76.84  
49.90  
42.96  
40.52  
39.28  
38.44  
32.37  
28.86  
28.65  
20.35  
19.30

<sup>13</sup>C-NMR (100 MHz)  
Solvent: CDCl<sub>3</sub>

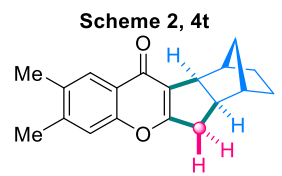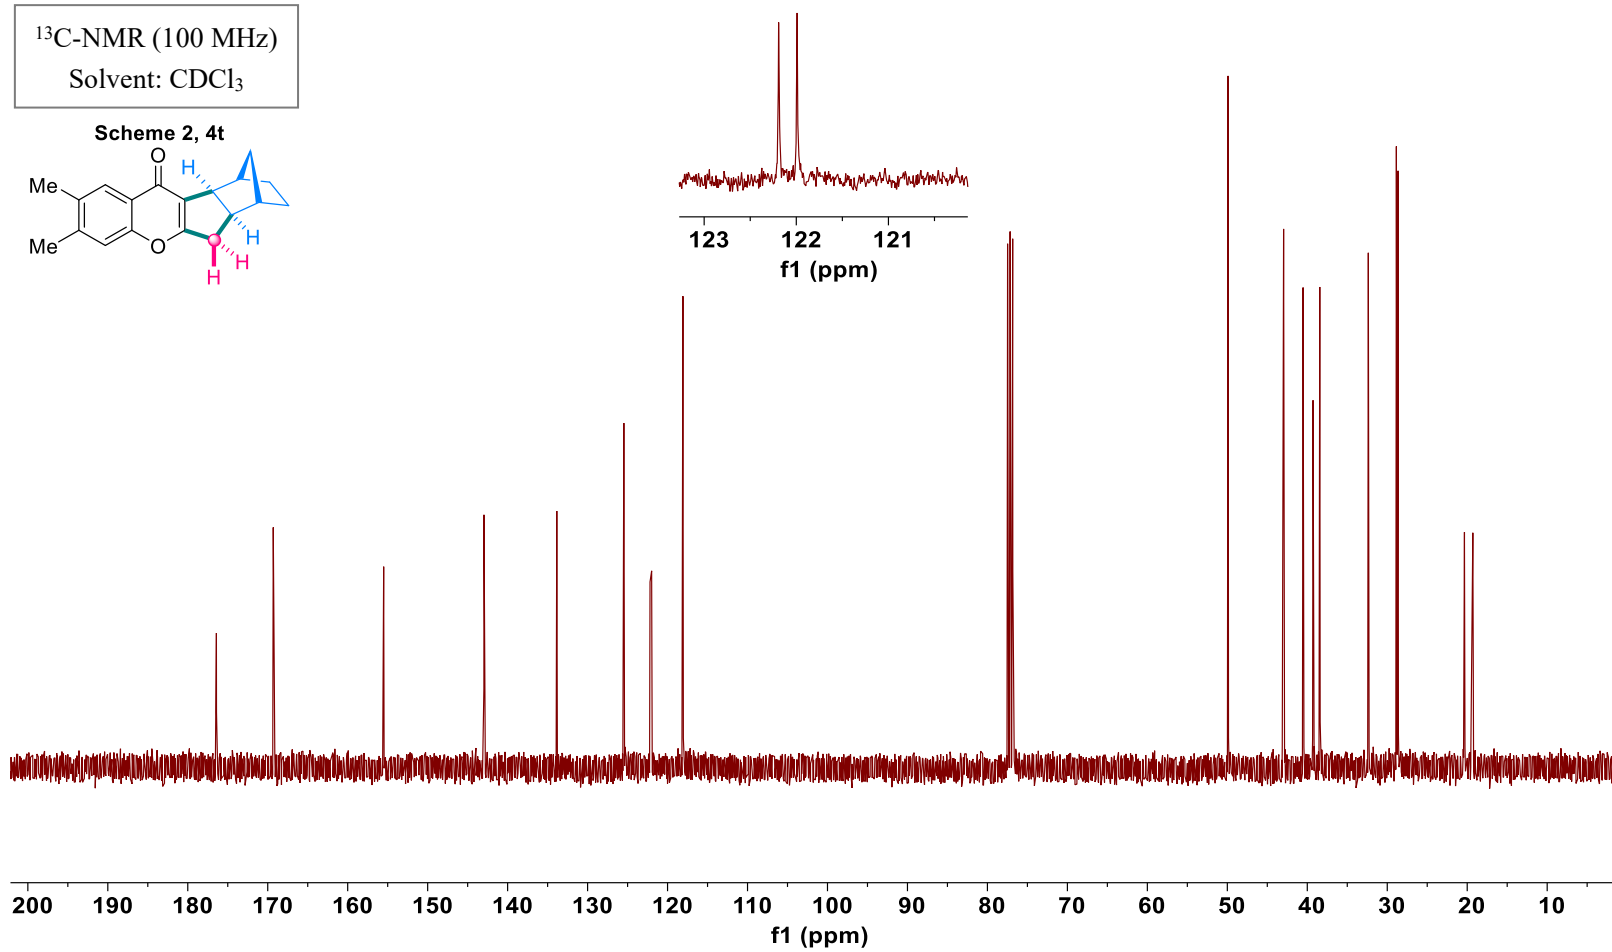

ZJK-31-2-h

<sup>1</sup>H-NMR (400 MHz)  
Solvent: CDCl<sub>3</sub>

Scheme 2, 4u

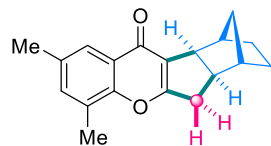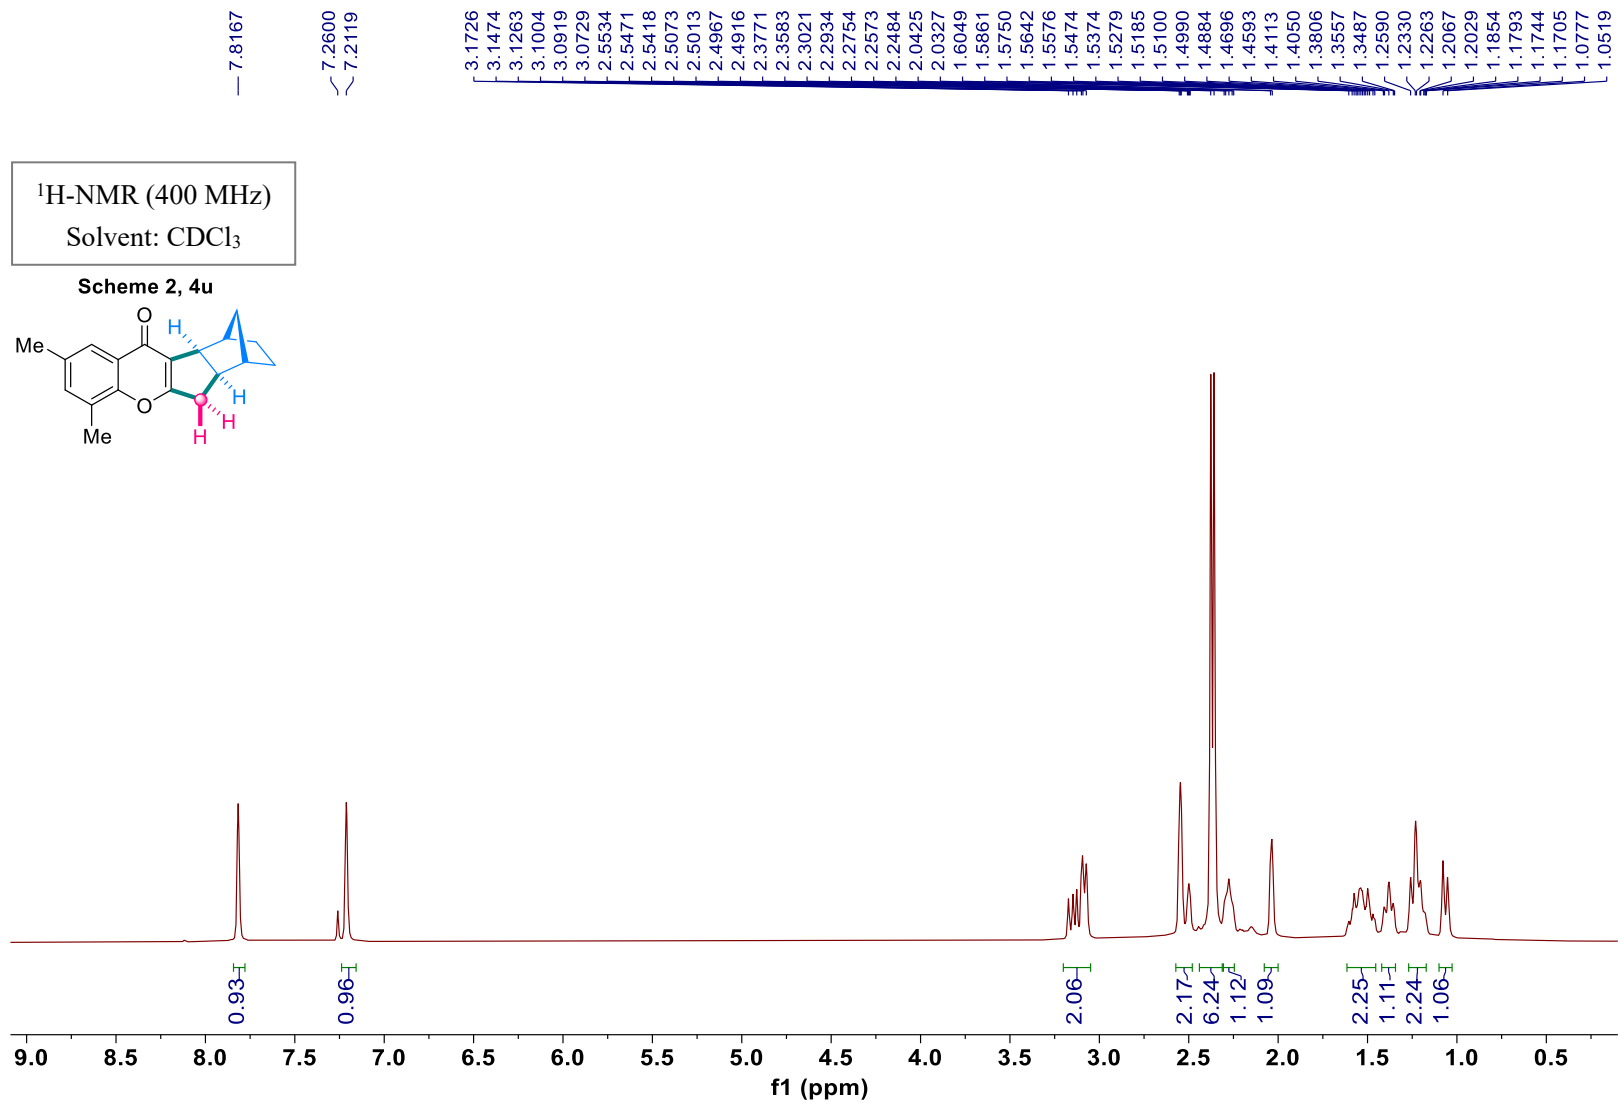

ZJK-31-2-C

— 176.72

— 169.44

— 153.76

135.07

133.98

126.90

123.94

122.82

121.89

77.48

77.16

76.84

— 49.87

42.97

40.55

39.25

38.51

32.37

28.85

28.64

— 20.85

— 15.63

$^{13}\text{C}$ -NMR (100 MHz)

Solvent:  $\text{CDCl}_3$

Scheme 2, 4u

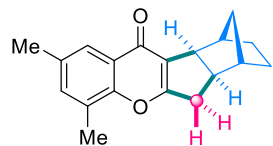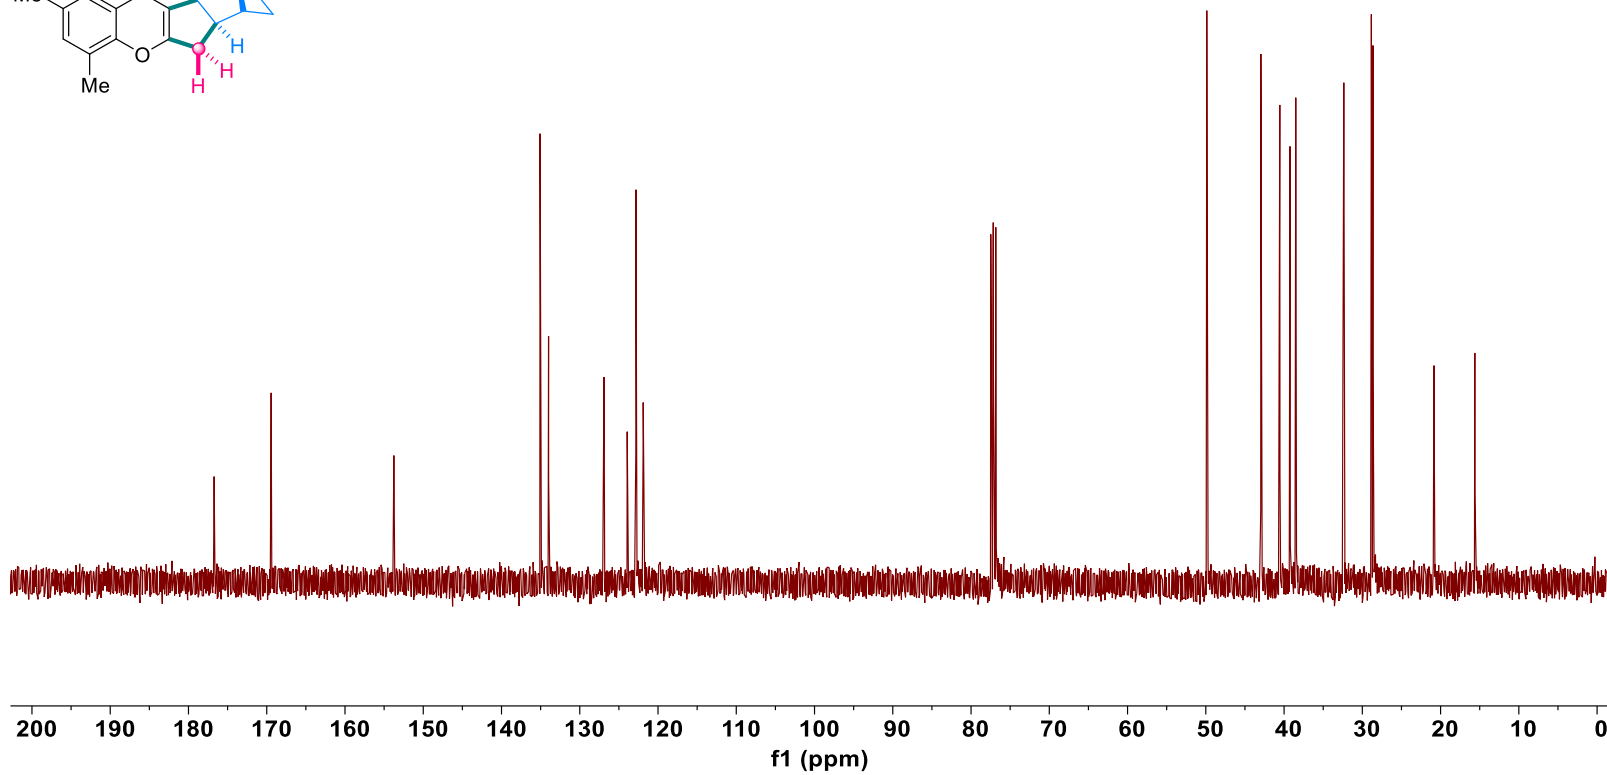

S66

ZJK-32-1-h

— 8.1214

— 7.2491

— 4.2388

3.1629  
3.1375  
3.1164  
3.0841  
3.0612  
2.5282  
2.4814  
2.4353  
2.3137  
2.2906  
2.2681  
2.0472  
1.5828  
1.5443  
1.5032  
1.4741  
1.4010  
1.3736  
1.3486  
1.2453  
1.2190  
1.1795  
1.0963  
1.0701

<sup>1</sup>H-NMR (400 MHz)  
Solvent: CDCl<sub>3</sub>

Scheme 2, 4v

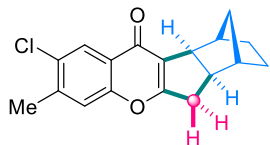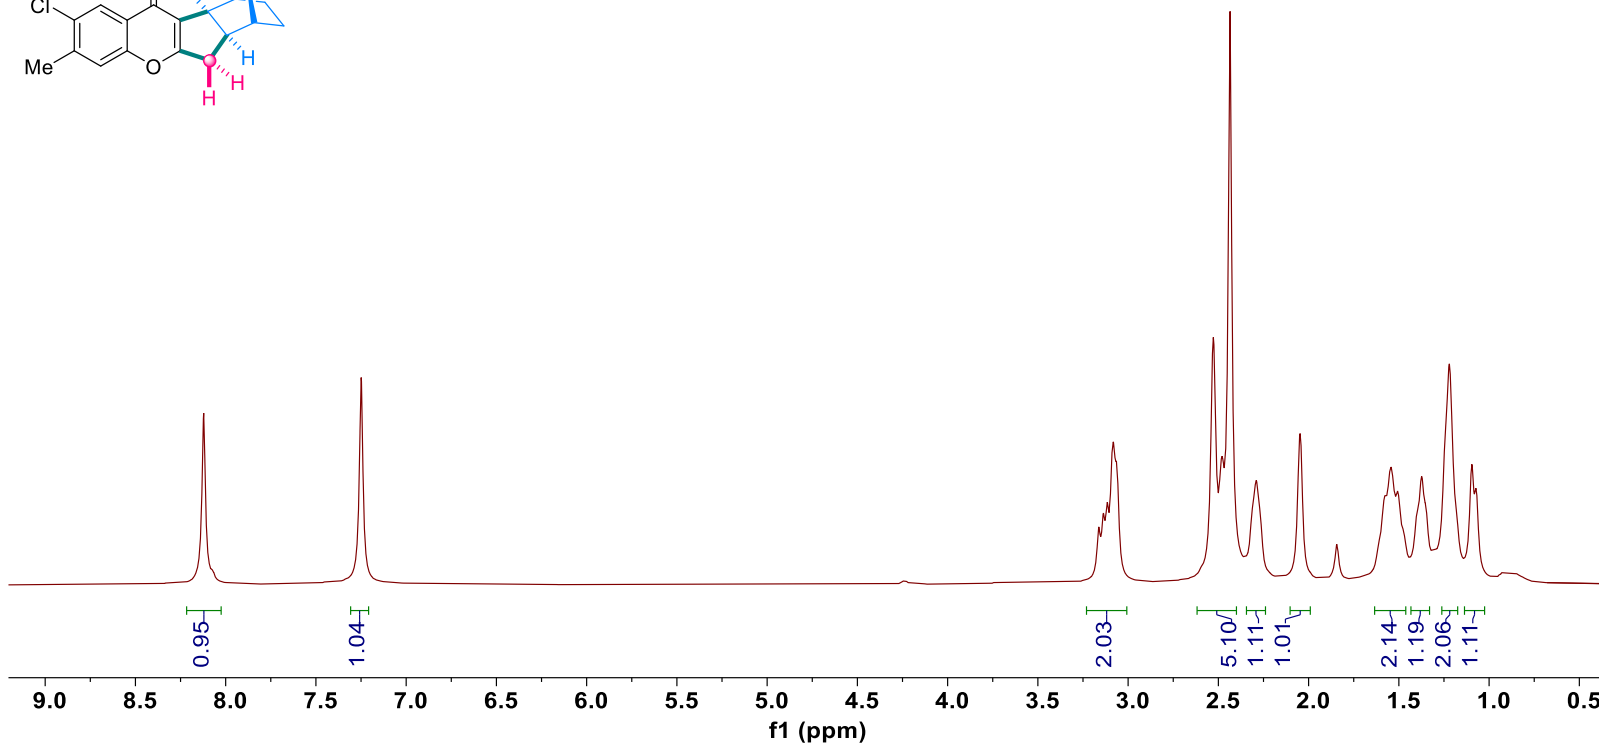

ZJK-32-1-C

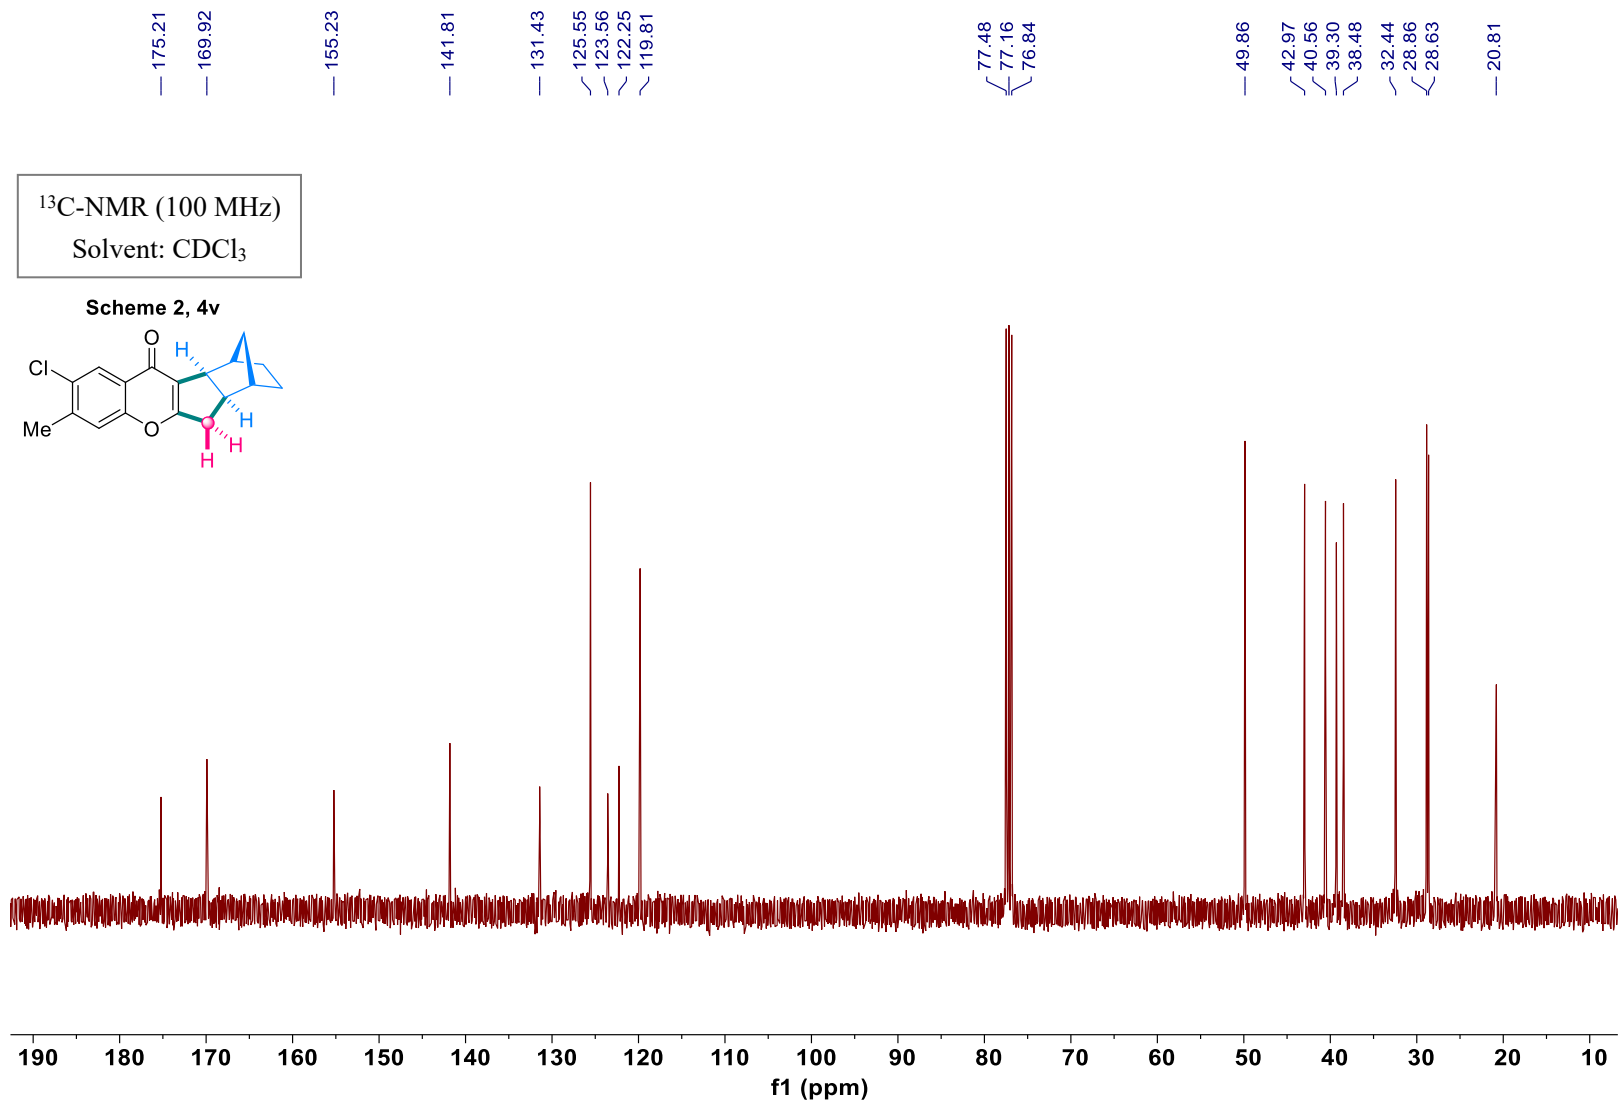

ZJK-32-2-h

8.1114  
8.1053  
7.7808  
7.7747

7.2603

3.2576  
3.2322  
3.2101  
3.1848  
3.1047  
3.0854  
2.6426  
2.6350  
2.6276  
2.5957  
2.5873  
2.5796  
2.5347  
2.5245  
2.3686  
2.3580  
2.3411  
2.3218  
2.3122  
2.0913  
2.0812  
1.6395  
1.6290  
1.6099  
1.5993  
1.5714  
1.5618  
1.5517  
1.5353  
1.5257  
1.5150  
1.4961  
1.4851  
1.4174  
1.4097  
1.3864  
1.3602  
1.3167  
1.2680  
1.2463  
1.2373  
1.2268  
1.2004  
1.1299  
1.1037

<sup>1</sup>H-NMR (400 MHz)  
Solvent: CDCl<sub>3</sub>

Scheme 2, 4w

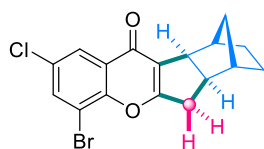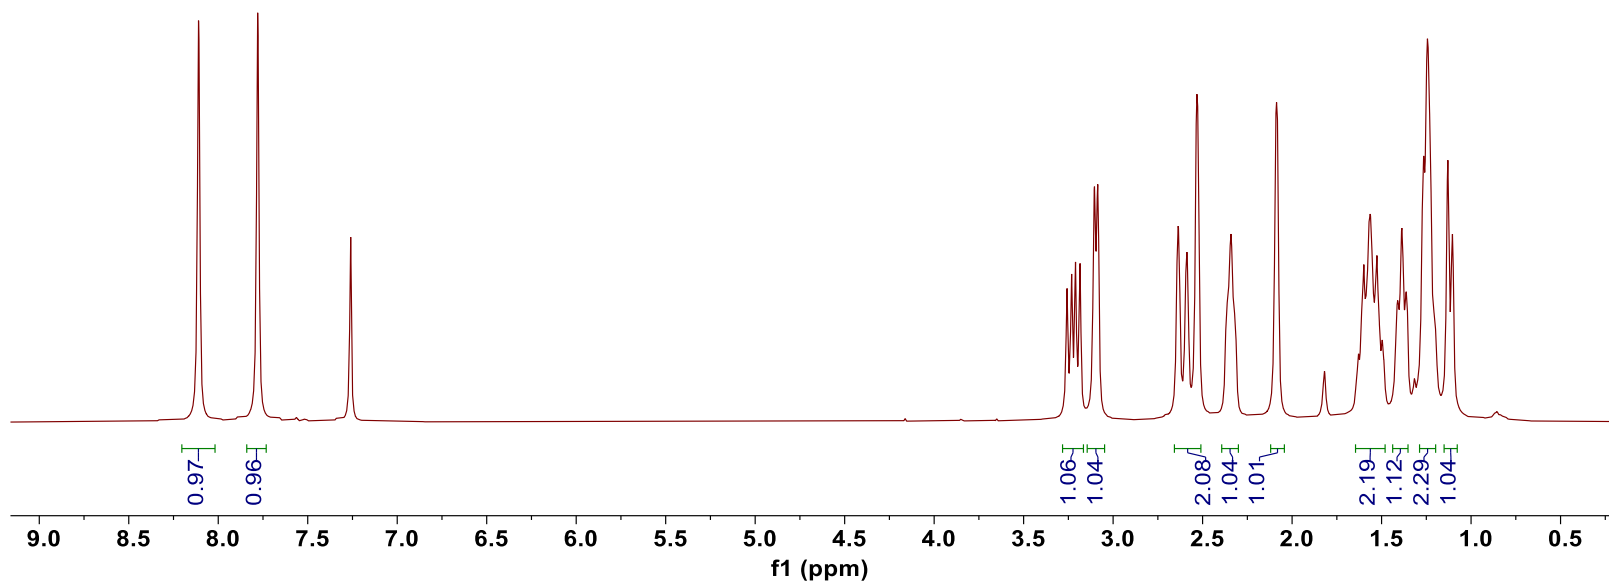

ZJK-32-2-c

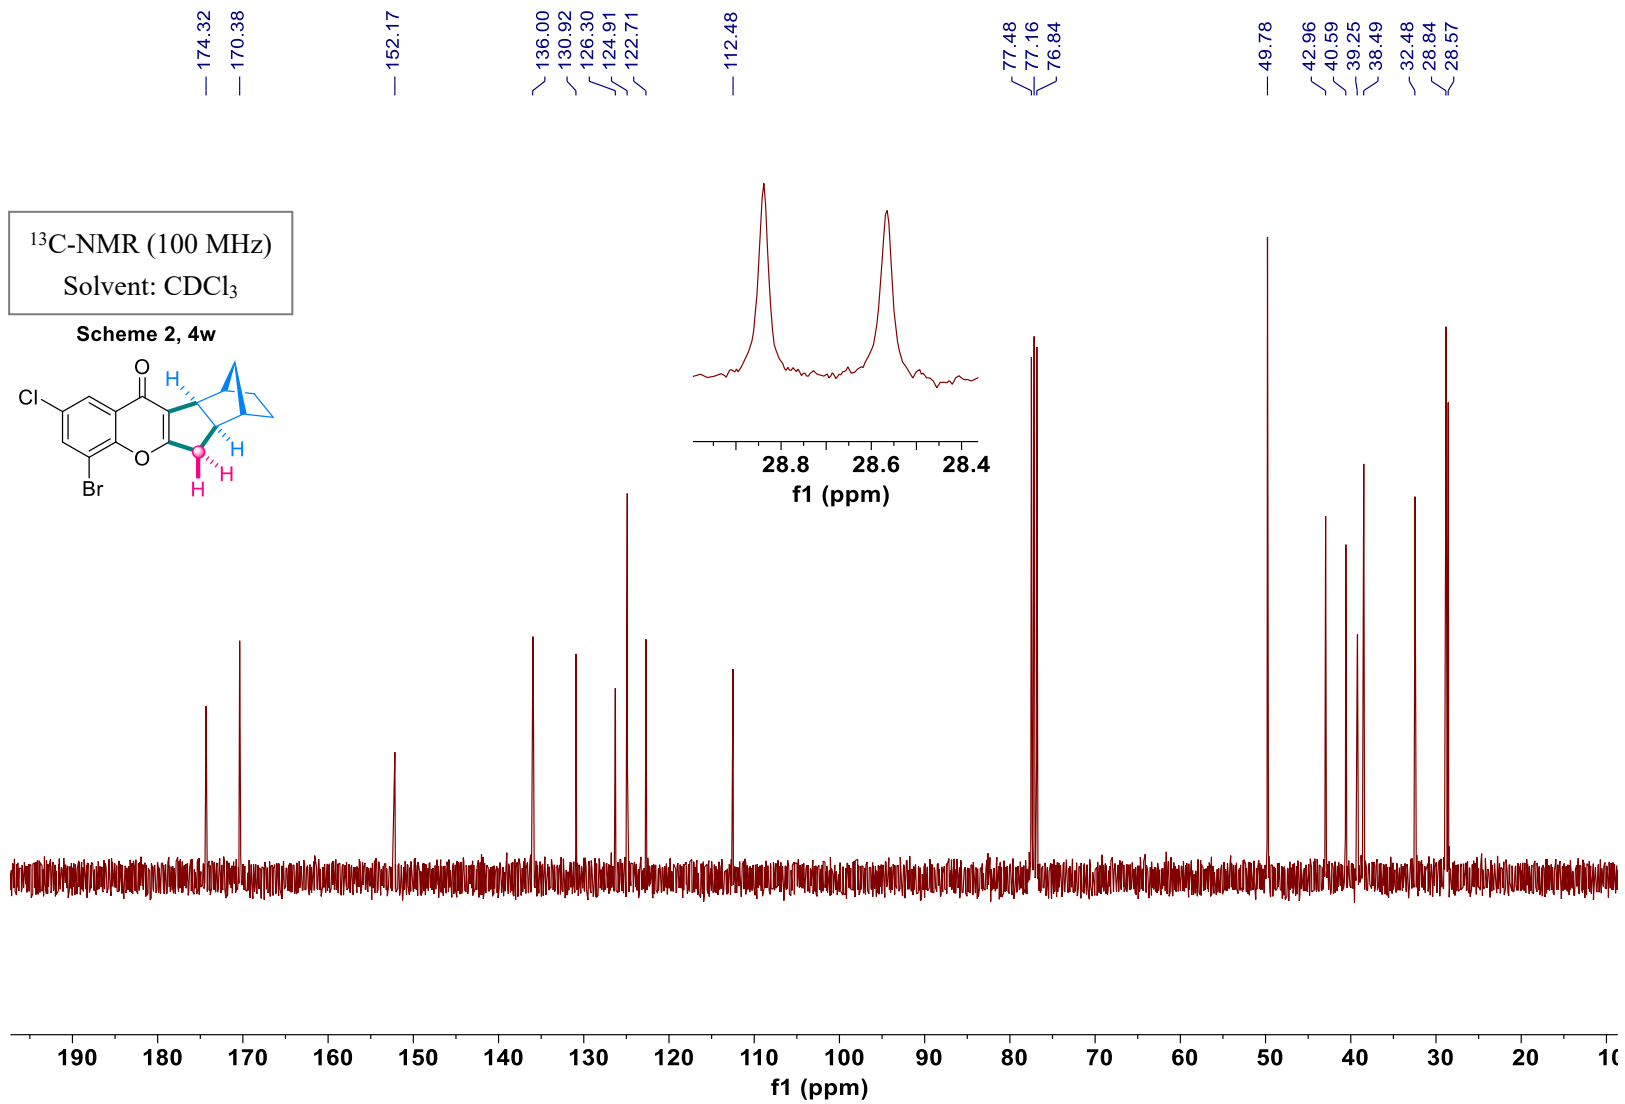

ZJK-33-2-h

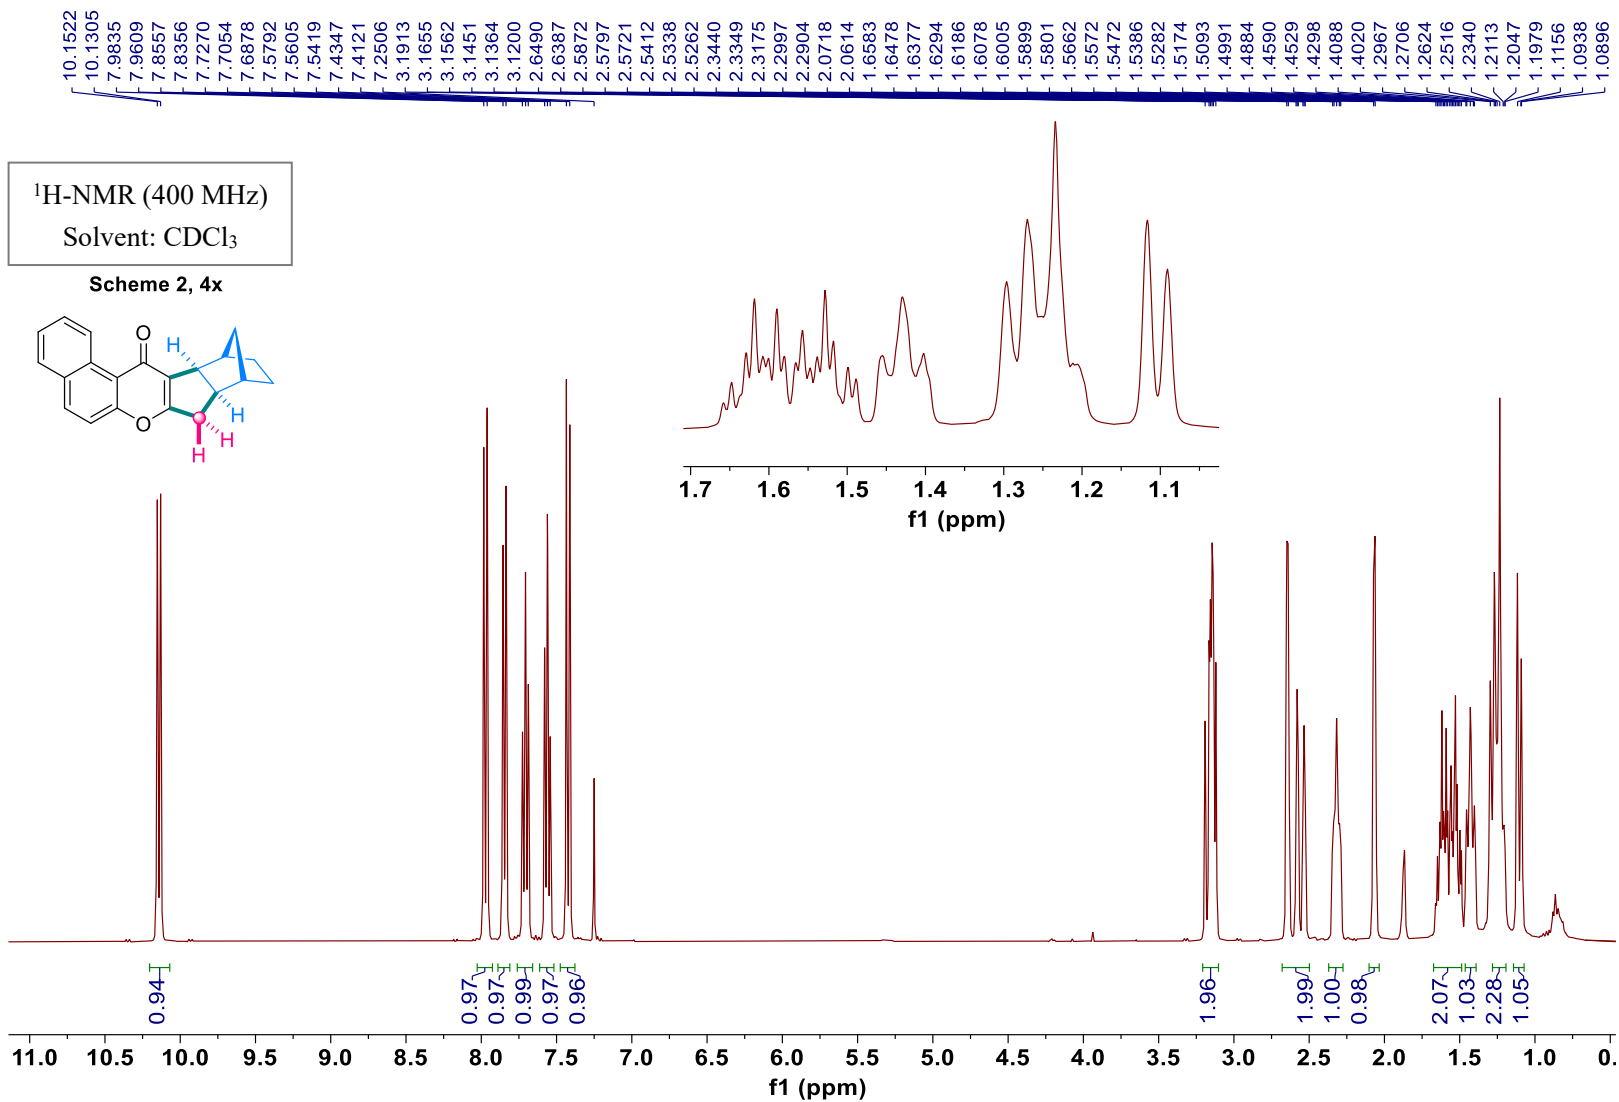



ZJK-33-2-C

— 178.68

— 166.94

— 158.14

134.53  
131.11  
130.65  
128.92  
128.08  
127.19  
126.32  
125.13  
117.81  
117.38

77.48  
77.16  
76.84

— 50.18

42.95  
40.96  
39.29  
38.01  
32.54  
28.93  
28.66

<sup>13</sup>C-NMR (100 MHz)  
Solvent: CDCl<sub>3</sub>

Scheme 2, 4x

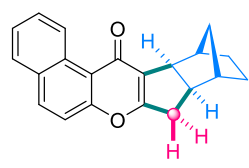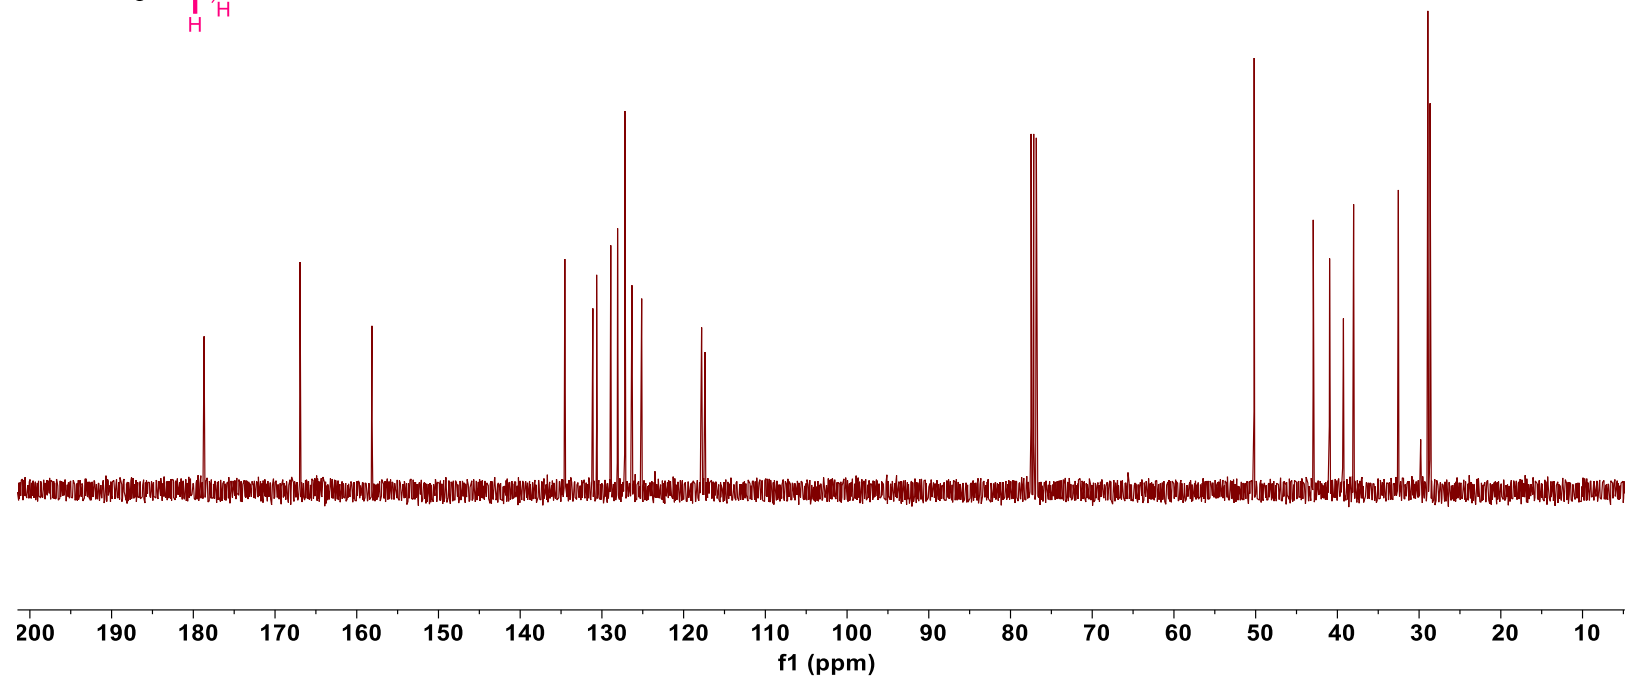

ZJK-33-1-h

8.4382  
8.4159  
8.1815  
8.1597  
7.8939  
7.8896  
7.8754  
7.8707  
7.7253  
7.7034  
7.6631  
7.6591  
7.6452  
7.6411  
7.6270  
7.6221  
7.6074  
7.6035  
7.5895  
7.5859  
7.2602  
3.3003  
3.2750  
3.2542  
3.2289  
3.1756  
3.1563  
2.6917  
2.6859  
2.6822  
2.6760  
2.6455  
2.6359  
2.6294  
2.6200  
2.3739  
2.3562  
2.3377  
2.1063  
2.0959  
1.6347  
1.6238  
1.6129  
1.6058  
1.5956  
1.5864  
1.5790  
1.5705  
1.5523  
1.5420  
1.5313  
1.4571  
1.4329  
1.4253  
1.4055  
1.3272  
1.3220  
1.3173  
1.3006  
1.2960  
1.2915  
1.2831  
1.2767  
1.2681  
1.2623  
1.2556  
1.2506  
1.2459  
1.2405  
1.2315  
1.1345  
1.1085

<sup>1</sup>H-NMR (400 MHz)

Solvent: CDCl<sub>3</sub>

Scheme 2, 4y

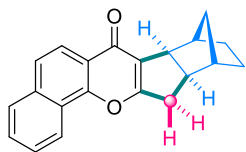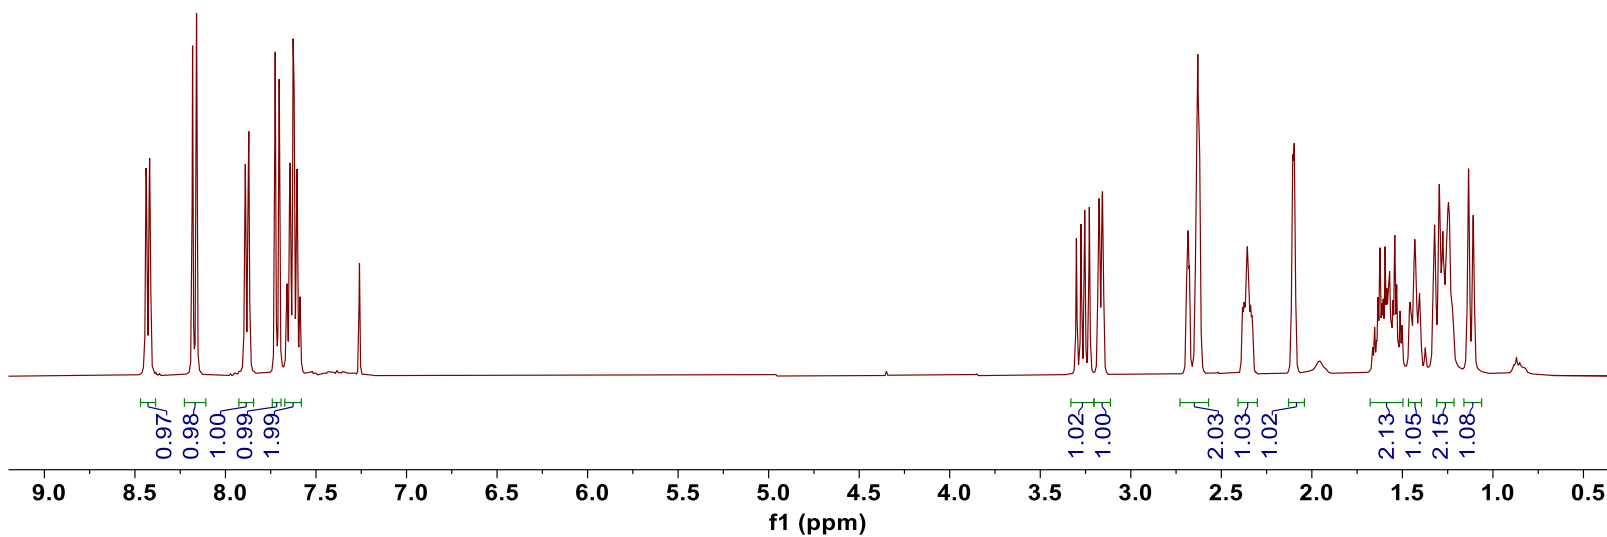

ZJK-33-1-C

— 176.37

— 168.89

— 154.18

— 135.56

— 128.87

— 128.05

— 126.91

— 124.85

— 124.19

— 123.73

— 122.19

— 121.19

— 120.56

— 77.48

— 77.16

— 76.84

— 49.96

— 43.04

— 40.76

— 39.29

— 38.43

— 32.52

— 28.93

— 28.68

$^{13}\text{C}$ -NMR (100 MHz)  
Solvent:  $\text{CDCl}_3$

Scheme 2, 4y

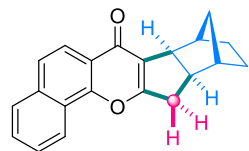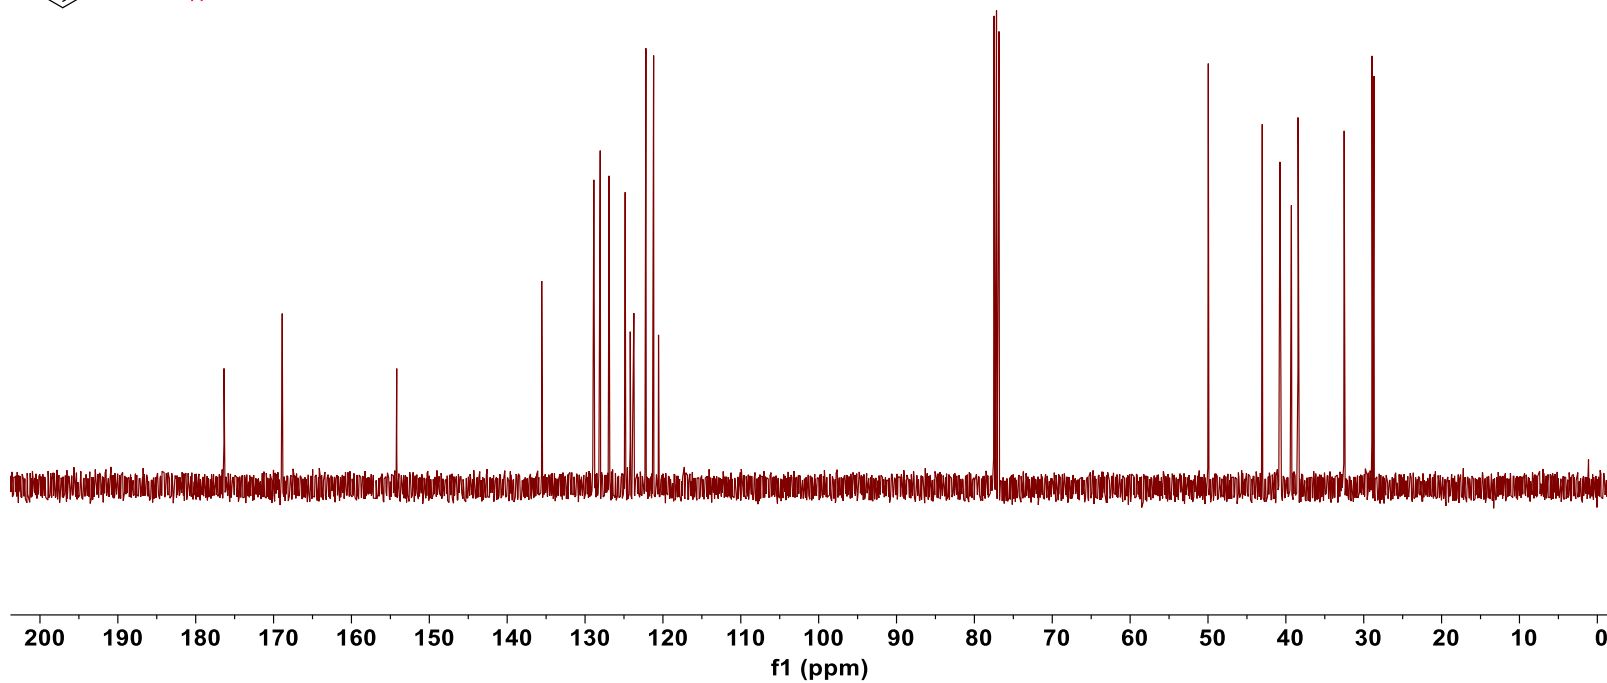

ZJK-40-1-h

8.2366  
8.2322  
8.2167  
8.2123  
7.6146  
7.6102  
7.5970  
7.5929  
7.5890  
7.5757  
7.5713  
7.4141  
7.4115  
7.3929  
7.3903  
7.3800  
7.3772  
7.3600  
7.3425  
7.3396  
7.2600  
6.2549  
6.2473  
6.2405  
6.2330  
6.0929  
6.0854  
6.0784  
6.0710  
3.1534  
3.1452  
3.1334  
3.1290  
3.1191  
3.1138  
3.1096  
3.0980  
3.0726  
2.6597  
2.5703  
2.5646  
2.5610  
2.5550  
2.5235  
2.5176  
2.5140  
2.5081  
2.3528  
2.3489  
2.3414  
2.3326  
2.3287  
2.3239  
2.3187  
2.3132  
2.3056  
2.2979  
2.2944  
1.4079  
1.4037  
1.3993  
1.3850  
1.3805  
1.3763  
1.3186  
1.2963

<sup>1</sup>H-NMR (400 MHz)  
Solvent: CDCl<sub>3</sub>

Fig. 1, 4z

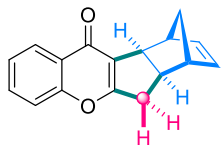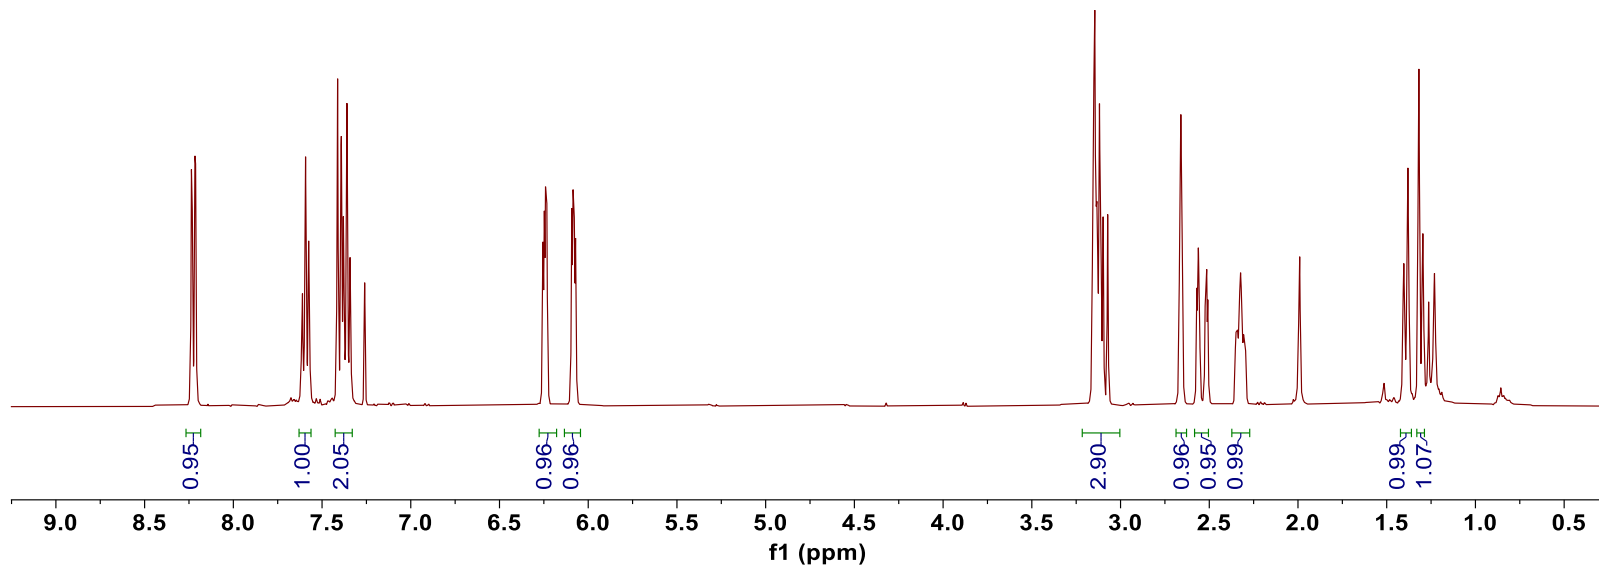

ZJK-40-1-C

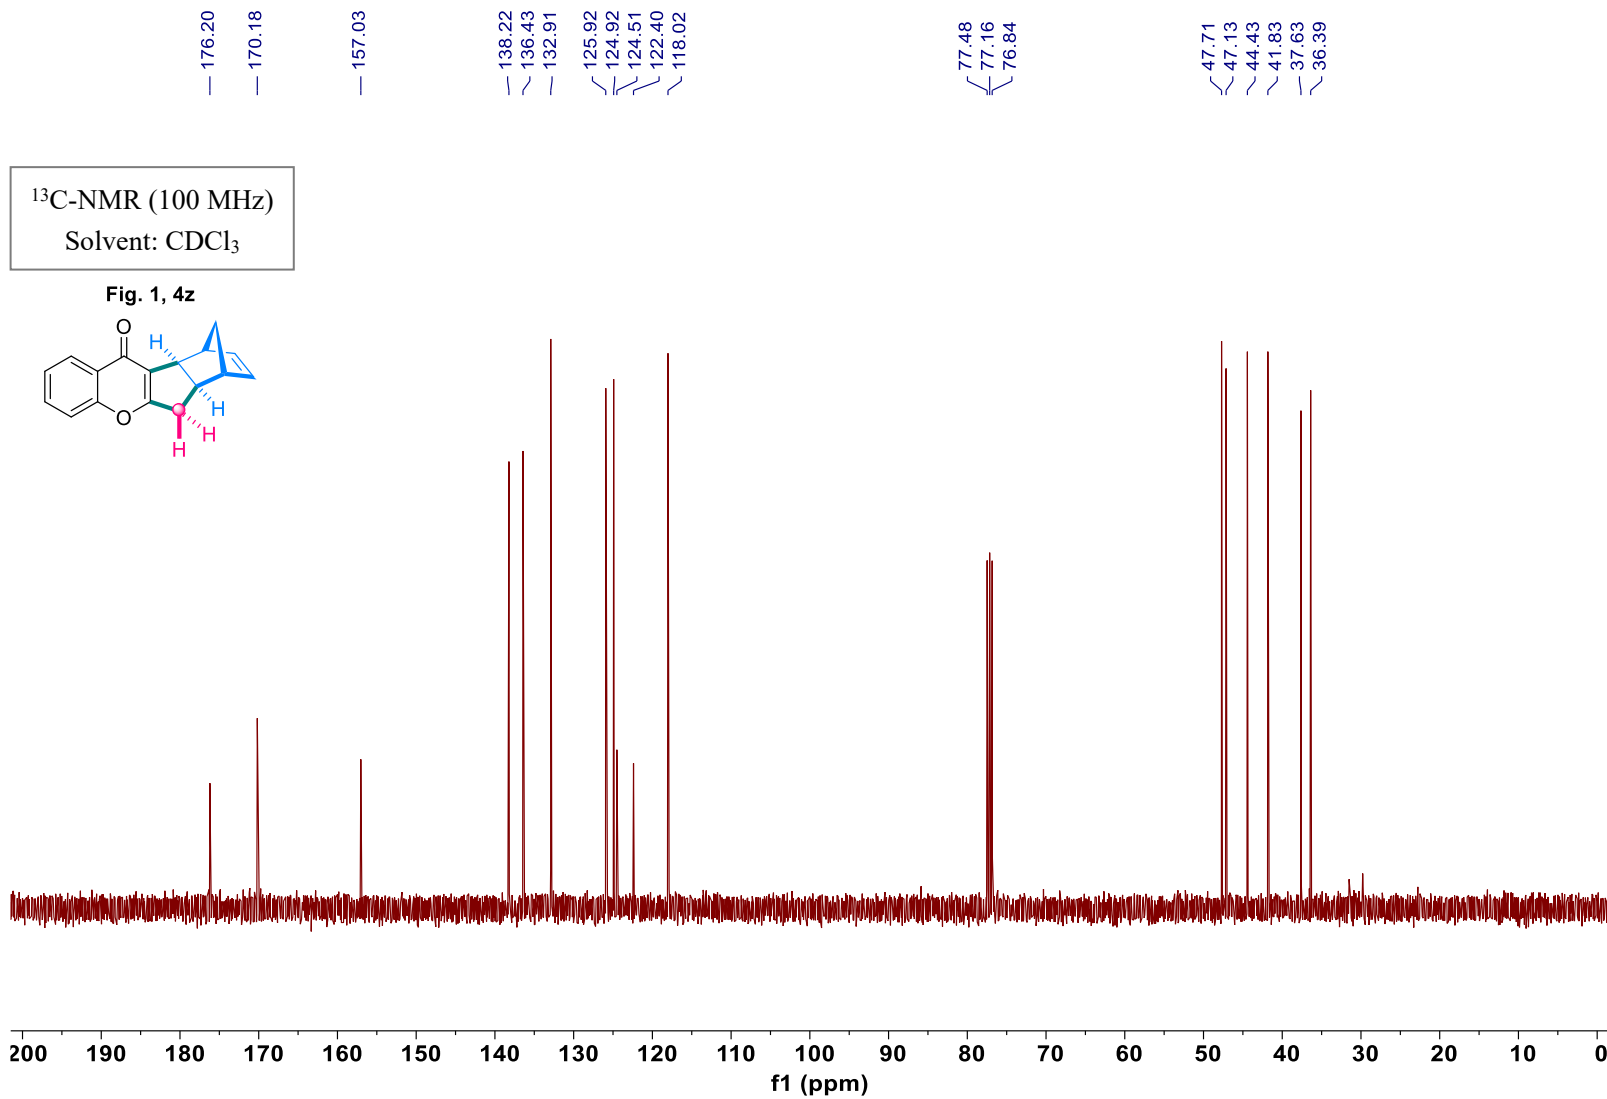

ZJK-36-1-h

8.2118  
8.2076  
8.1919  
8.1877  
7.5975  
7.5933  
7.5769  
7.5590  
7.5548  
7.3876  
7.3652  
7.3438  
7.3250  
7.2599

3.4958  
3.4776  
3.1720  
3.1467  
3.1256  
3.1004  
2.6769  
2.6676  
2.6497  
2.6203  
2.6076  
2.4745  
2.4670  
2.4591  
2.4279  
2.4202  
2.4127  
2.3810  
2.3733  
2.1743  
2.1664  
2.0935  
2.0816  
2.0662  
1.8118  
1.8001  
1.7868  
1.7748  
1.7101  
1.6984  
1.6841  
1.6740  
1.6492  
1.5035  
1.4929  
1.4859  
1.4693  
1.4571  
1.2963  
1.2708  
1.2314  
1.1084  
1.0826  
1.0280  
1.0090  
0.9923  
0.9658

<sup>1</sup>H-NMR (400 MHz)  
Solvent: CDCl<sub>3</sub>

Fig. 1, 4aa

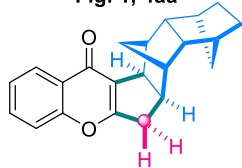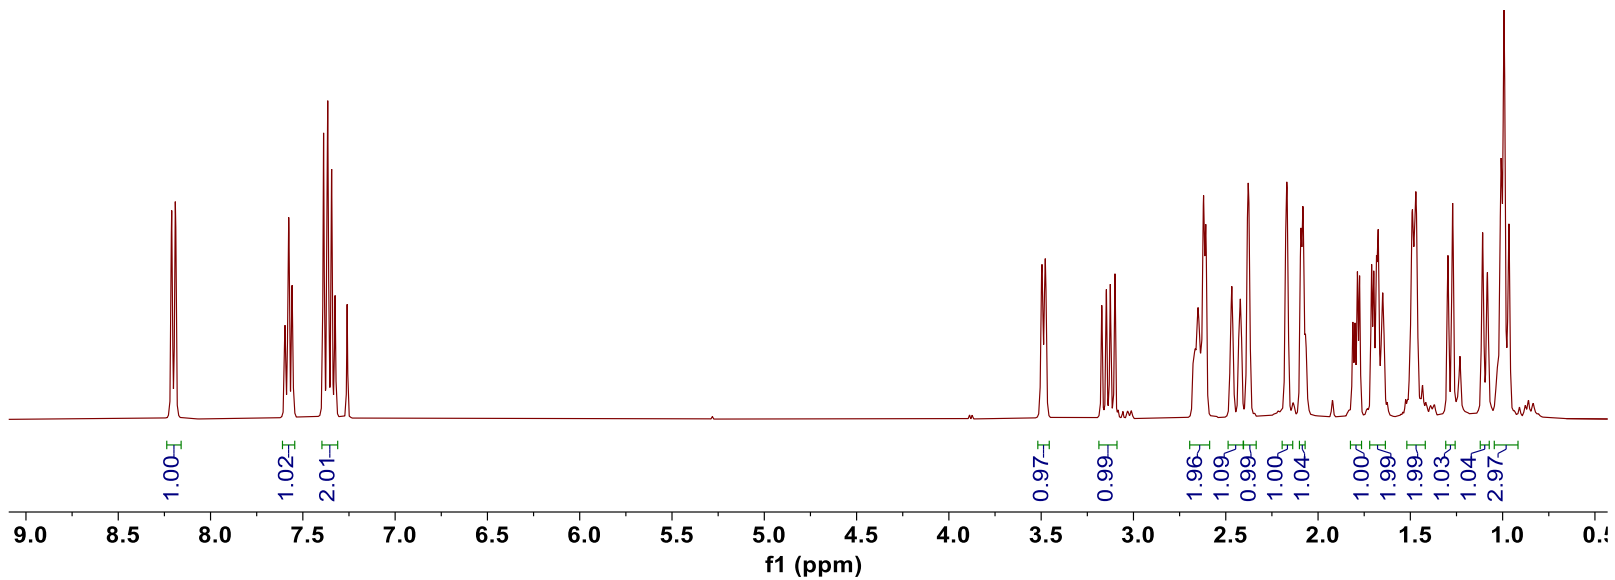

ZJK-36-1-c

— 176.06

— 169.50

— 156.88

— 132.75

— 125.80

— 124.75

— 124.41

— 122.36

— 117.91

— 77.48

— 77.16

— 76.84

— 50.08

— 50.06

— 48.17

— 44.80

— 43.99

— 38.85

— 36.44

— 35.61

— 35.44

— 35.15

— 31.41

— 31.39

$^{13}\text{C}$ -NMR (100 MHz)  
Solvent:  $\text{CDCl}_3$

Fig. 1, 4aa

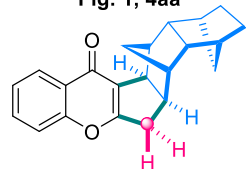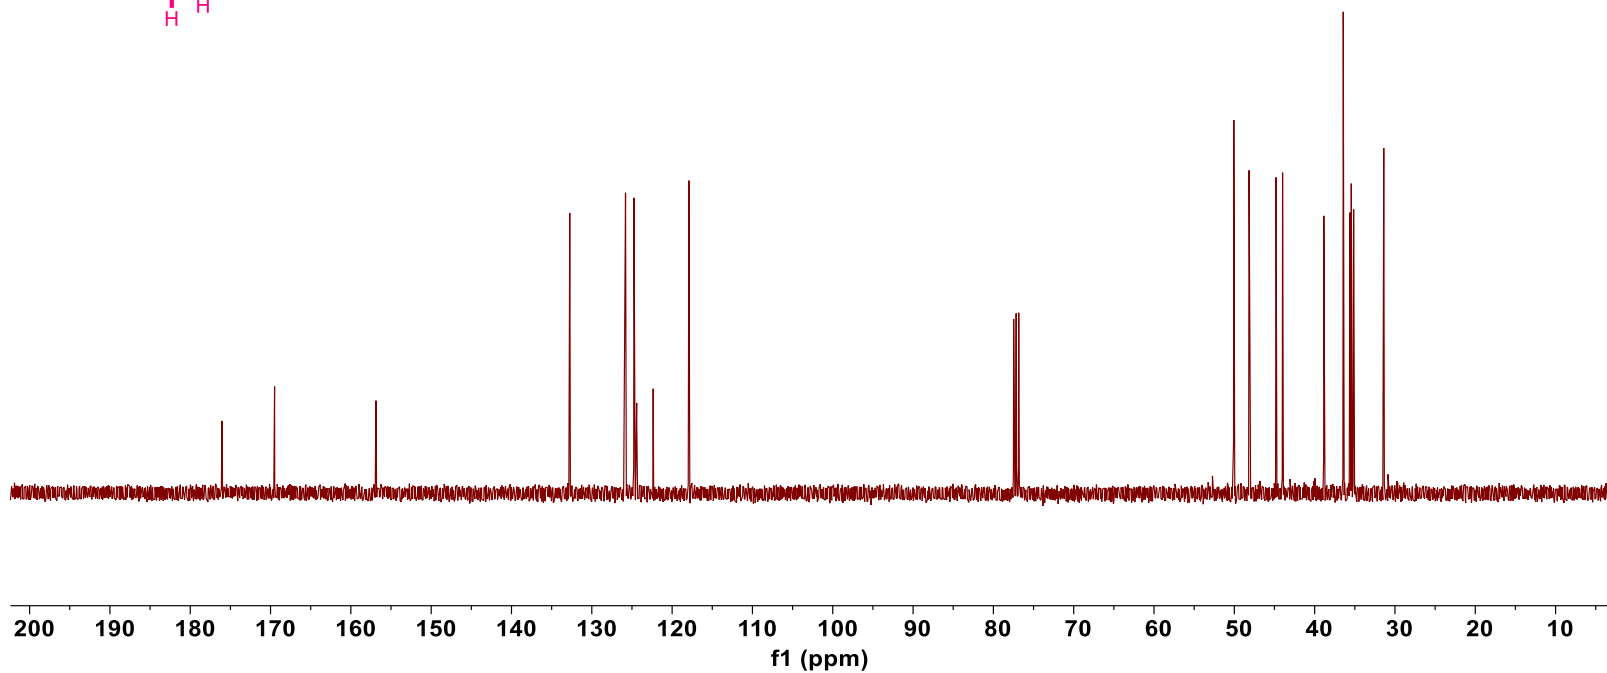

ZJK-35-1-h

8.2665  
8.2623  
8.2467  
8.2423  
7.6363  
7.6320  
7.6188  
7.6147  
7.6107  
7.5975  
7.5931  
7.4672  
7.4316  
7.4109  
7.4043  
7.3850  
7.3673  
7.3646  
7.2602  
6.8966

3.4095  
3.4001  
3.2940  
3.2684  
3.2471  
3.2217  
3.2023  
3.1928  
3.1786  
3.1596

2.7109  
2.6569  
2.6512  
2.6470  
2.6413  
2.6099  
2.6041  
2.6001  
2.5944  
2.3835  
2.3797  
2.3668  
2.3641  
2.3467  
2.1974  
2.1617  
2.1540  
1.0438  
1.0146  
0.8104  
0.7823

<sup>1</sup>H-NMR (400 MHz)

Solvent: CDCl<sub>3</sub>

Fig. 1, 4ab

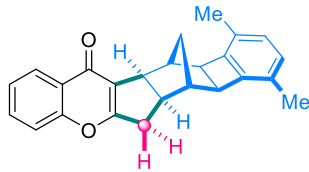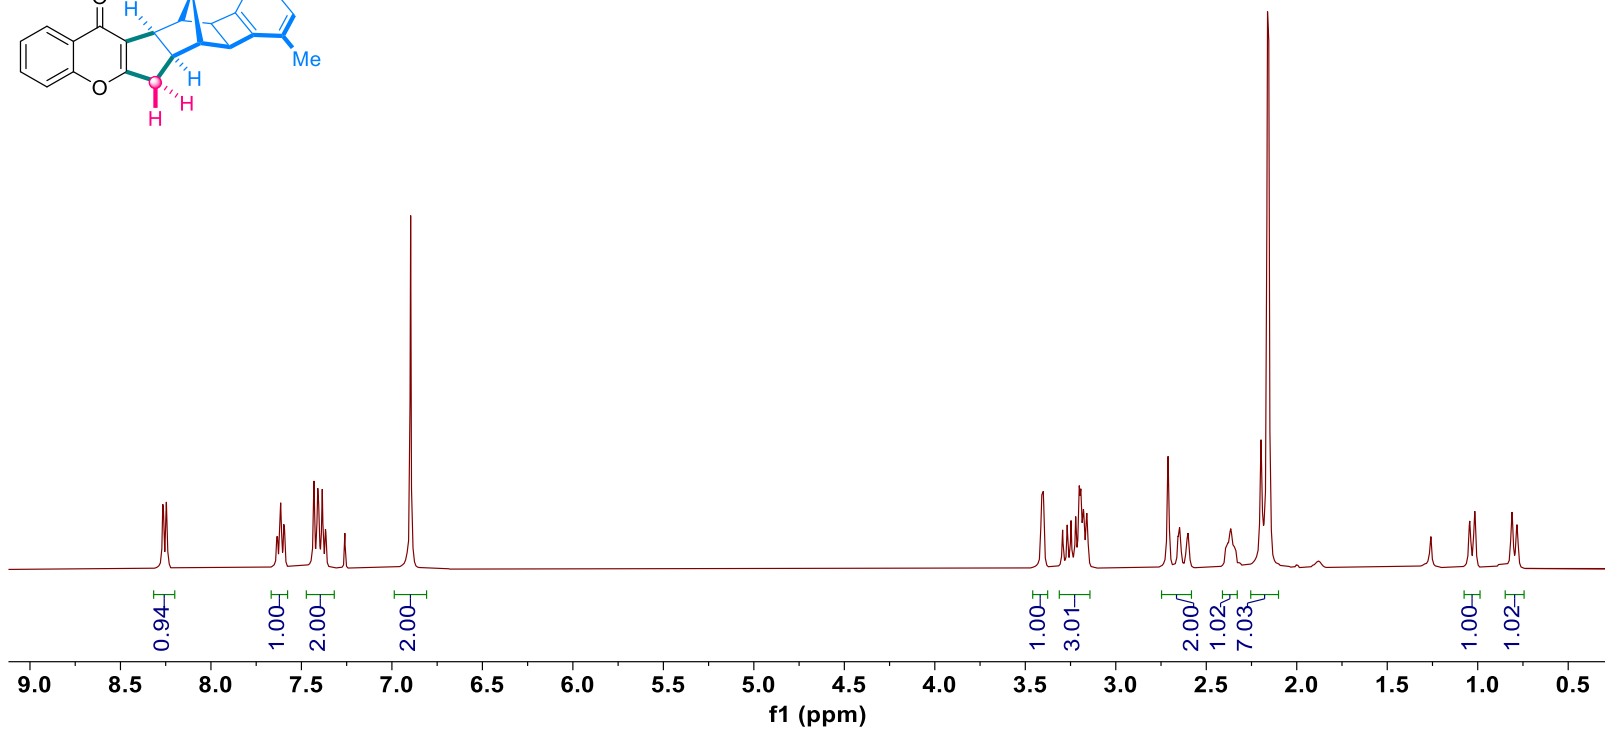



ZJK-35-1-c

— 176.38

— 169.64

— 156.98

143.98

143.32

132.97

129.66

129.07

128.68

128.50

125.89

124.95

124.40

122.11

118.01

77.48

77.16

76.85

48.64

48.60

47.81

42.39

39.19

38.93

38.19

— 26.70

16.44

16.27

$^{13}\text{C}$ -NMR (100 MHz)  
Solvent:  $\text{CDCl}_3$

Fig. 1, 4ab

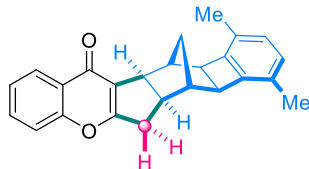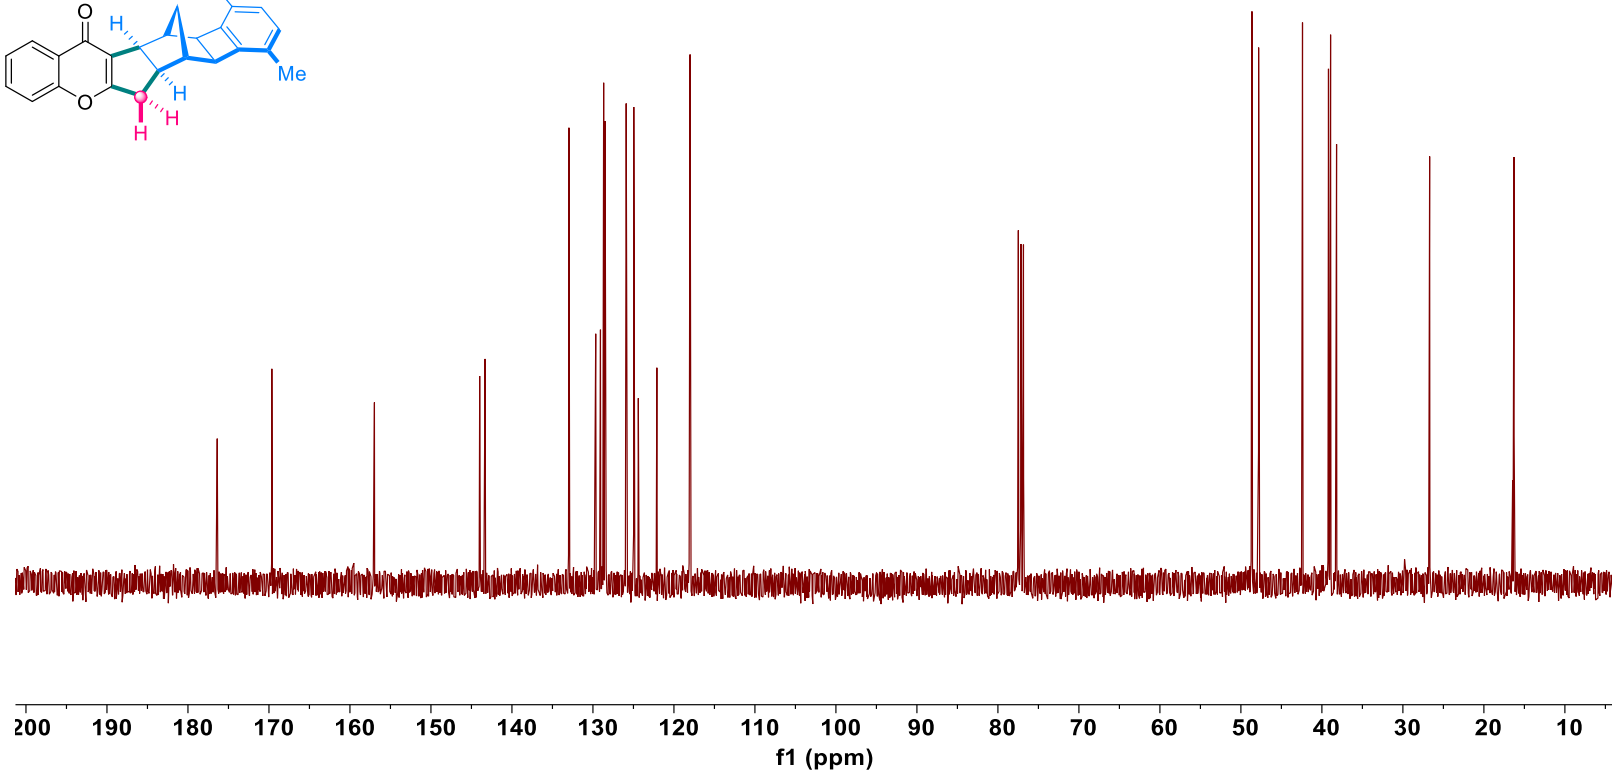

ZJK-35-2-h

8.2240  
8.2052  
7.5894  
7.5855  
7.5816  
7.5681  
7.5640  
7.5468  
7.5422  
7.3661  
7.3454  
7.3259  
7.3031  
7.2944  
7.2811  
7.2675  
7.2578  
7.2504  
7.1919  
7.1858  
7.1708  
7.1546  
7.1478  
7.1260  
7.1101  
7.1003  
7.0902  
7.0780  
7.0699  
7.0608  
7.0561  
7.0420  
7.0370  
4.3763  
4.3693  
4.2738  
4.2667  
3.0859  
3.0605  
3.0391  
3.0143  
2.9959  
2.4327  
2.4086  
2.4011  
2.3937  
2.3619  
2.3542  
2.1960  
2.1873  
2.1694  
2.1620  
2.1480  
1.9715  
1.9642  
1.9500  
1.9429  
1.9276  
1.8809  
0.4623  
0.4332  
-0.4678  
-0.4968

<sup>1</sup>H-NMR (400 MHz)

Solvent: CDCl<sub>3</sub>

Fig. 1, 4ac

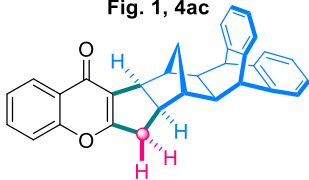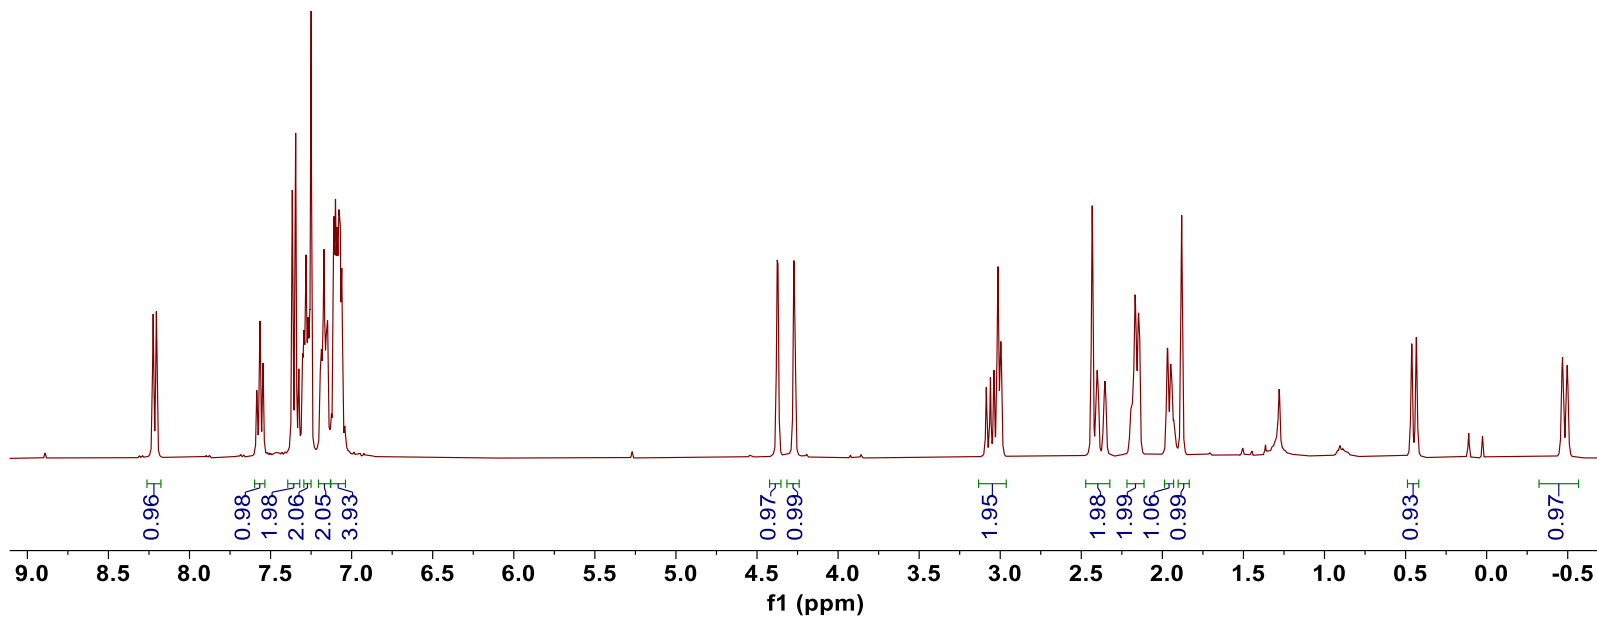

ZJK-35-2-c

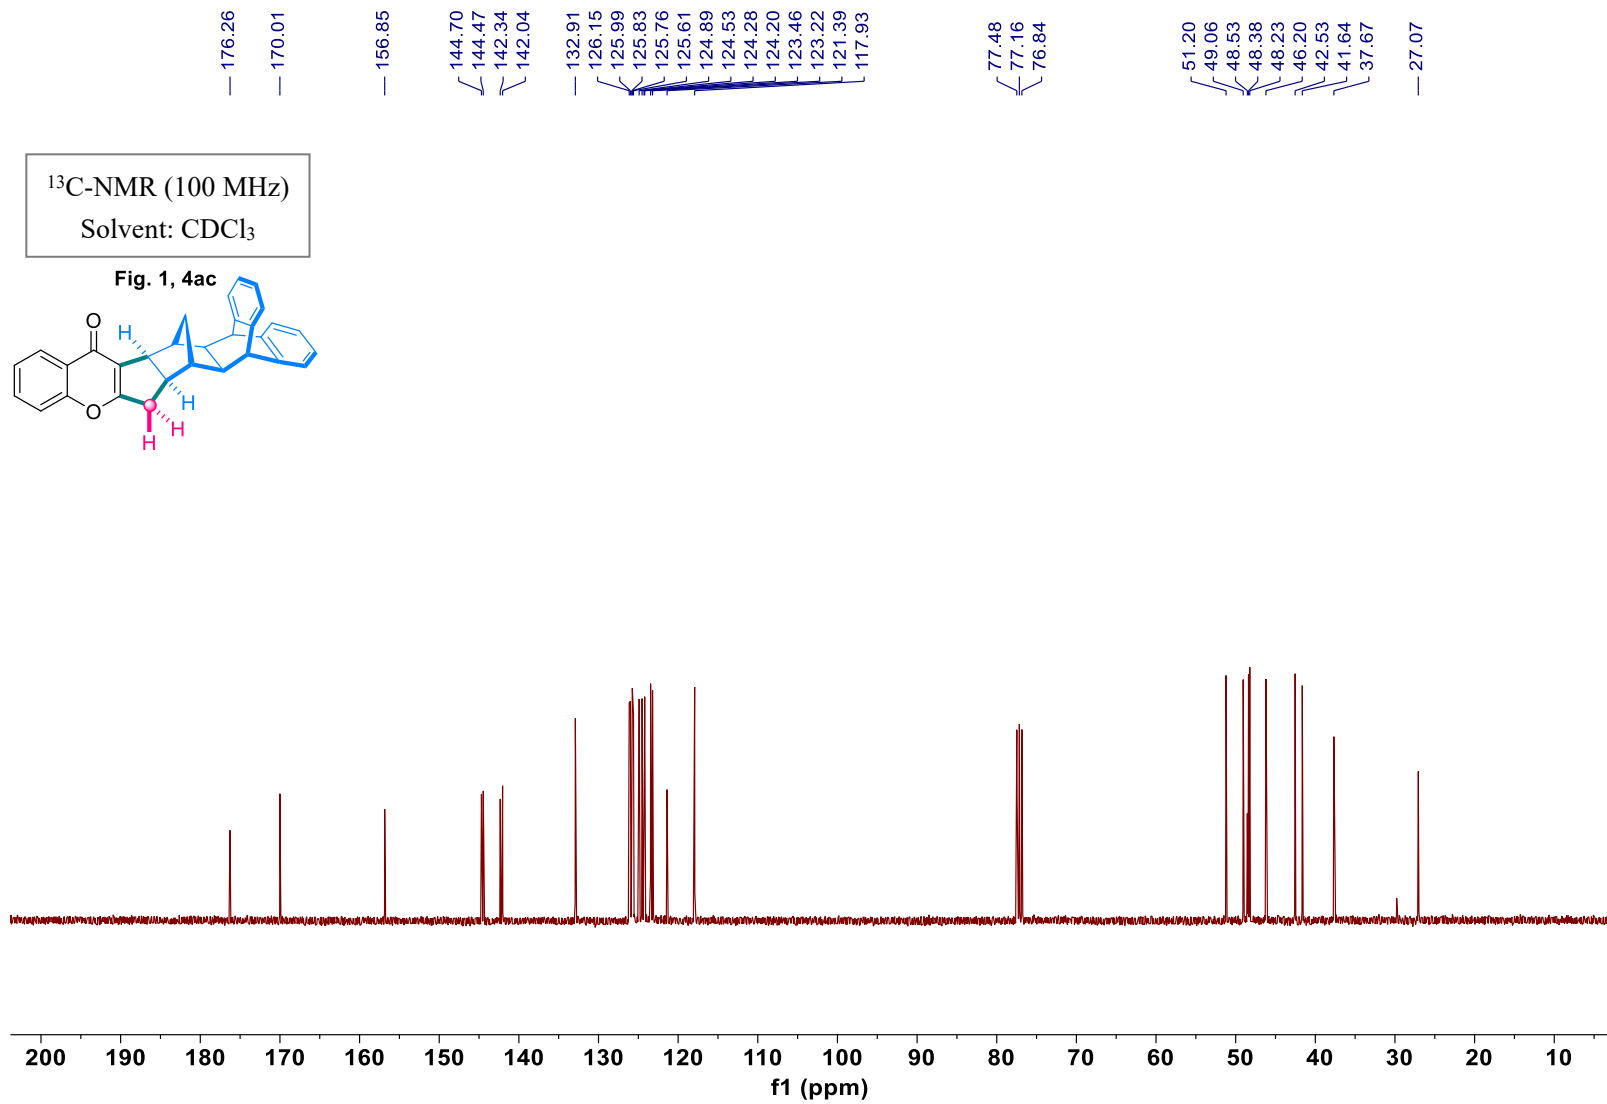

ZJK-37-2-h

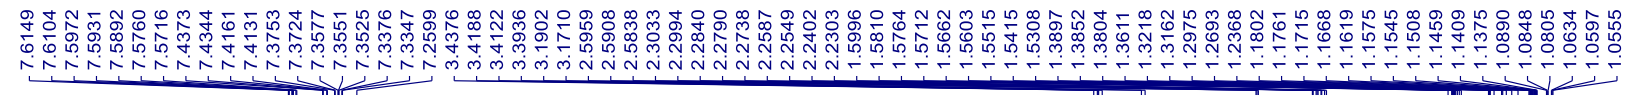

<sup>1</sup>H-NMR (400 MHz)

Solvent: CDCl<sub>3</sub>

Scheme 3, 4ad

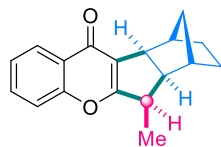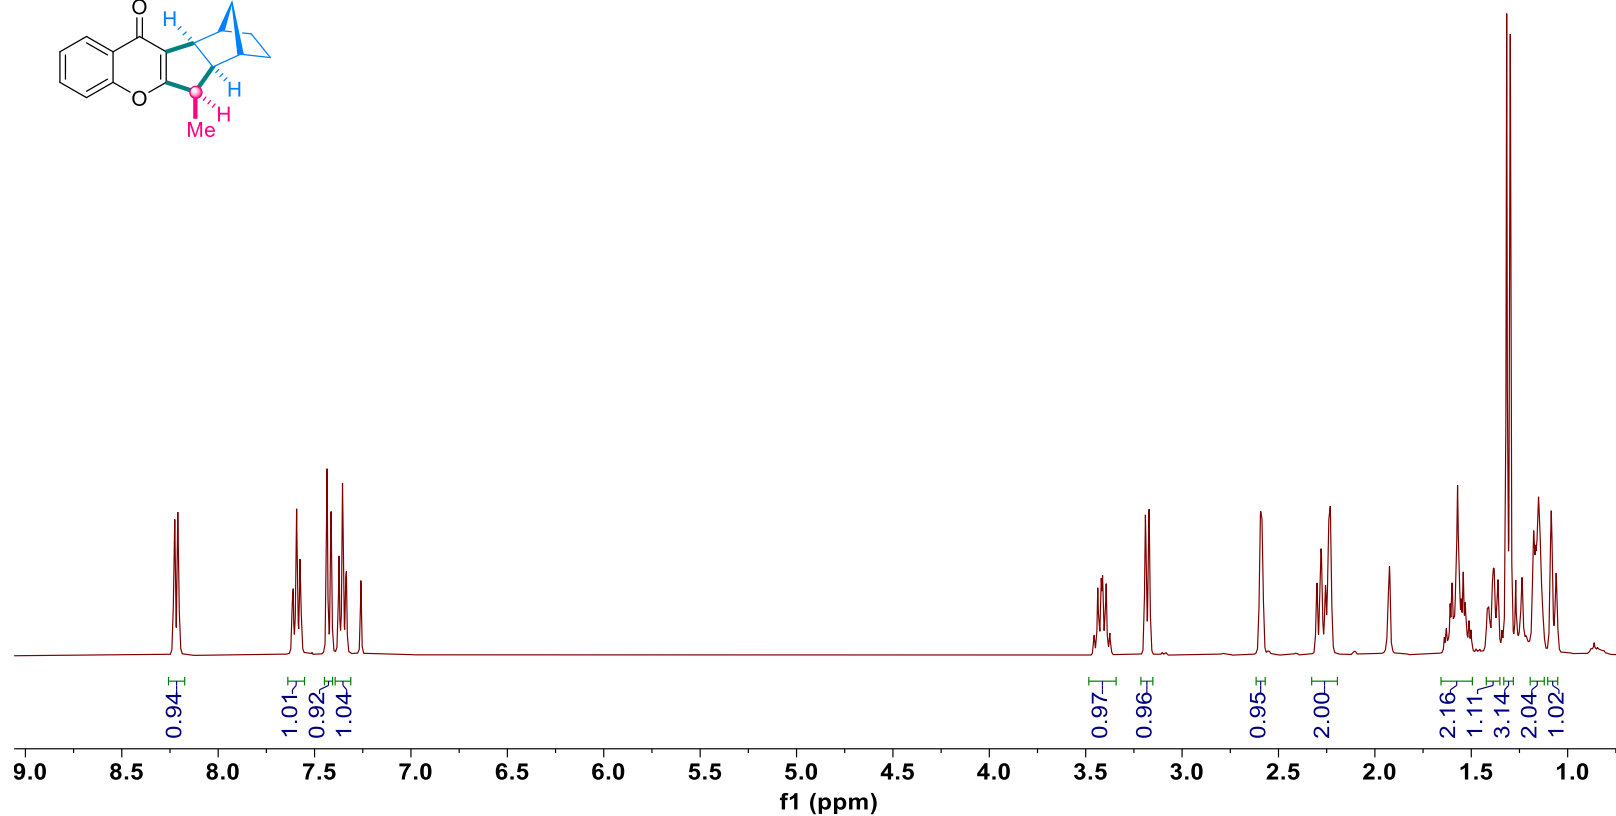

ZJK-37-2-c

— 176.56  
— 172.46

— 157.03

— 132.79  
— 125.89  
— 124.82  
— 124.59  
— 120.79  
— 118.07

— 77.48  
— 77.16  
— 76.84

— 49.67  
— 44.41  
— 40.86  
— 37.64  
— 37.11  
— 34.01  
— 29.38  
— 28.63

— 11.99

$^{13}\text{C}$ -NMR (100 MHz)  
Solvent:  $\text{CDCl}_3$

Scheme 3, 4ad

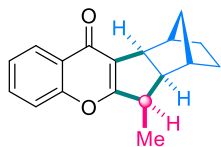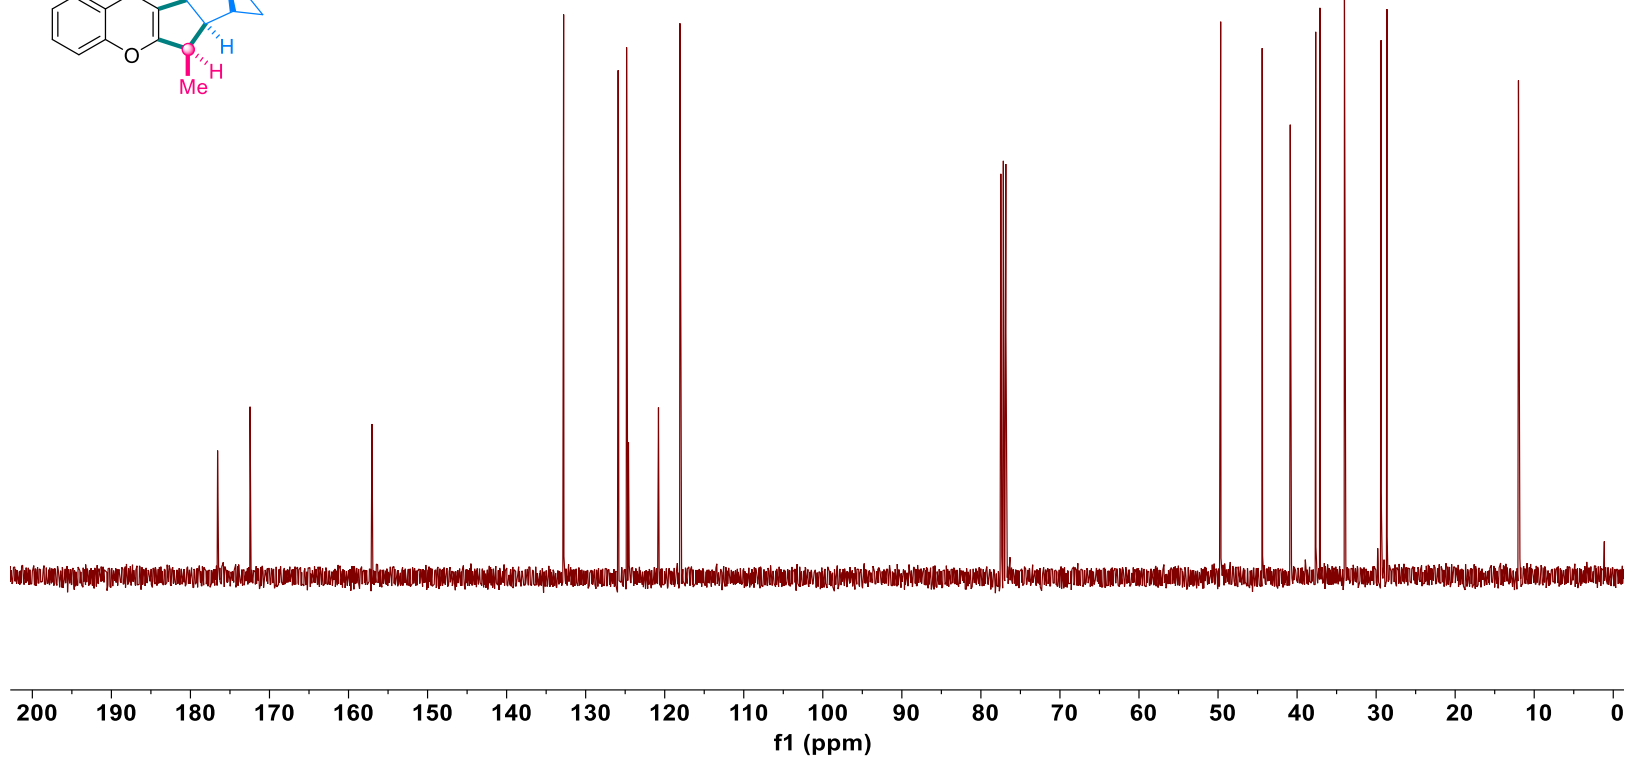

ZJK-39-1-h

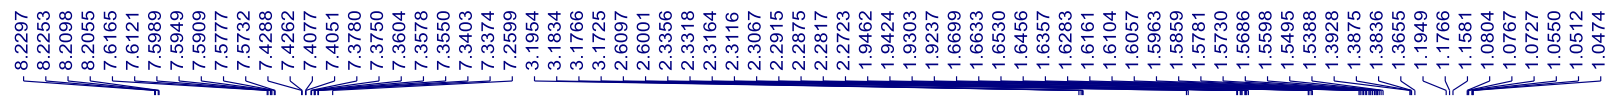

<sup>1</sup>H-NMR (400 MHz)

Solvent: CDCl<sub>3</sub>

Scheme 3, 4ae

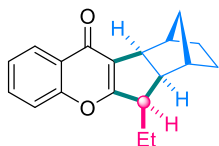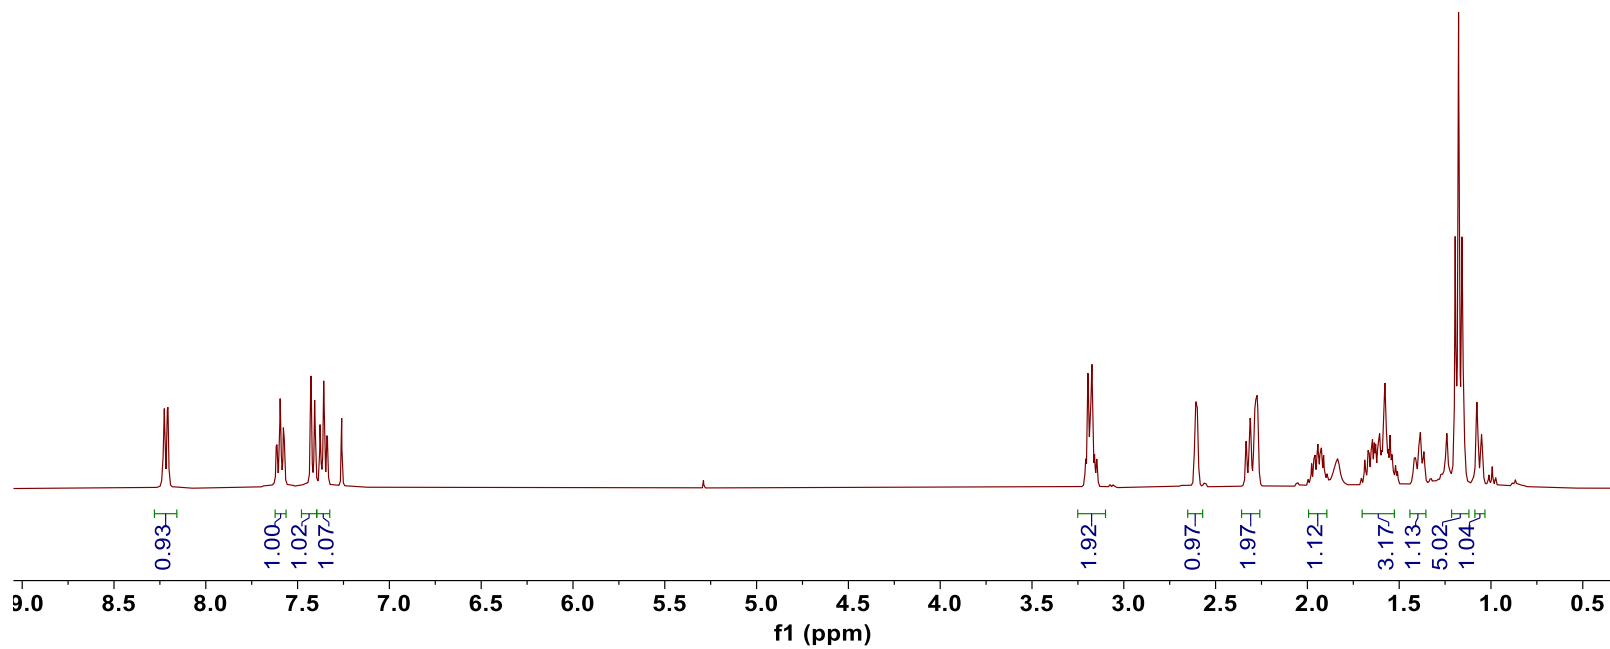

ZJK-39-1-c

— 176.60  
— 171.97

— 157.00

— 132.80  
— 125.90  
— 124.85  
— 124.61  
— 120.99  
— 118.09

— 77.48  
— 77.16  
— 76.84

— 49.42  
— 48.49  
— 43.65

— 37.77  
— 36.85  
— 34.00  
— 29.63  
— 28.47

— 20.26  
— 13.88

$^{13}\text{C}$ -NMR (100 MHz)  
Solvent:  $\text{CDCl}_3$

Scheme 3, 4ae

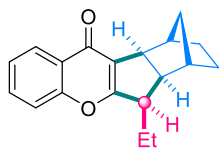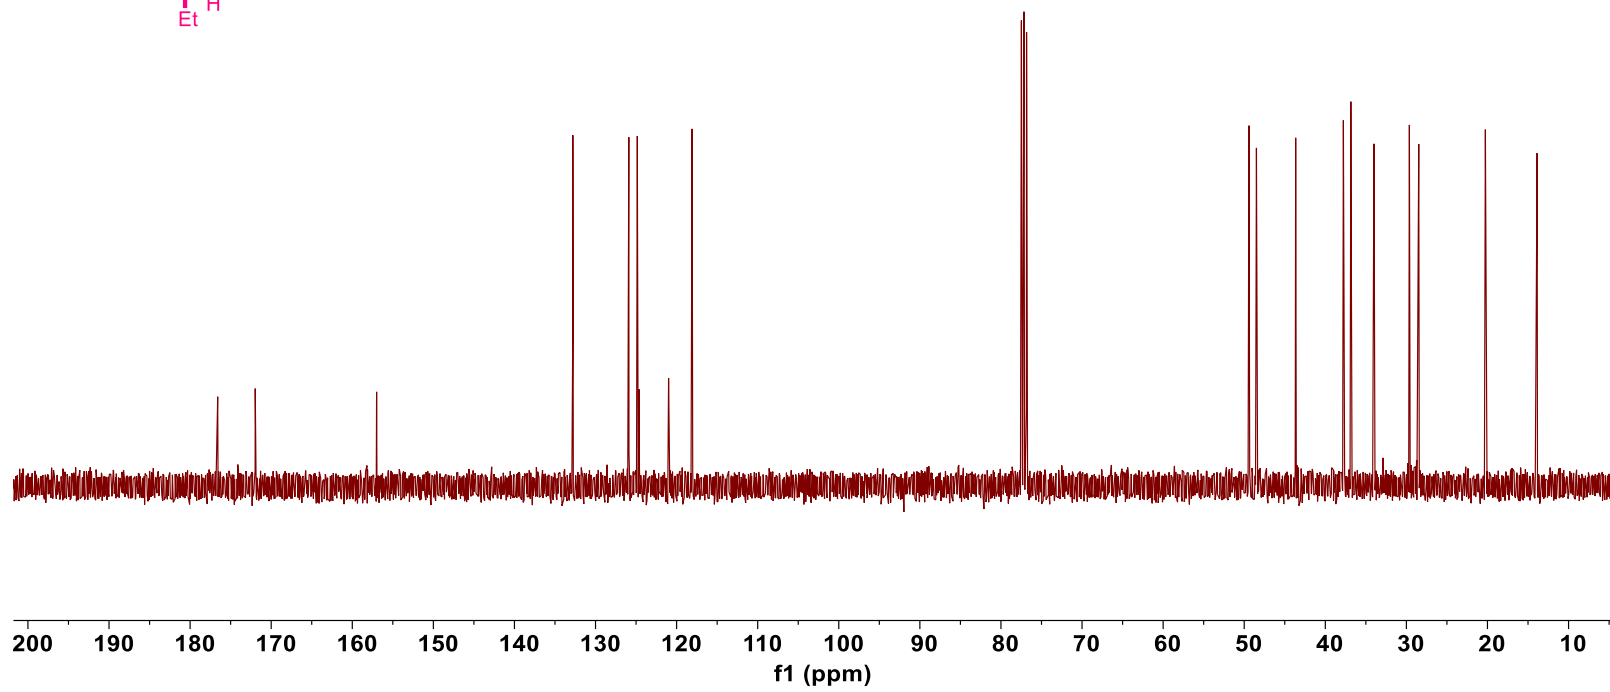

S86

ZJK-40-2-h

8.2302  
8.2260  
8.2105  
8.2060  
7.6151  
7.6108  
7.5977  
7.5936  
7.5893  
7.5763  
7.5718  
7.4339  
7.4130  
7.3754  
7.3564  
7.3378  
7.2606  
3.2935  
3.2824  
3.2700  
3.2588  
3.2462  
3.2351  
3.1929  
3.1739  
2.6130  
2.6033  
2.3154  
2.2975  
2.2926  
2.2879  
2.2715  
2.2466  
2.2367  
1.6527  
1.6455  
1.6343  
1.6267  
1.6146  
1.6049  
1.5974  
1.5917  
1.5862  
1.5798  
1.5749  
1.5645  
1.5572  
1.5456  
1.5349  
1.5157  
1.4209  
1.4154  
1.4102  
1.4040  
1.3906  
1.3830  
1.3653  
1.2420  
1.1881  
1.1640  
1.1388  
1.1317  
1.0797  
1.0535  
1.0466  
1.0297  
1.0110

<sup>1</sup>H-NMR (400 MHz)

Solvent: CDCl<sub>3</sub>

Scheme 3, 4af

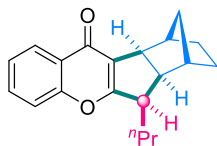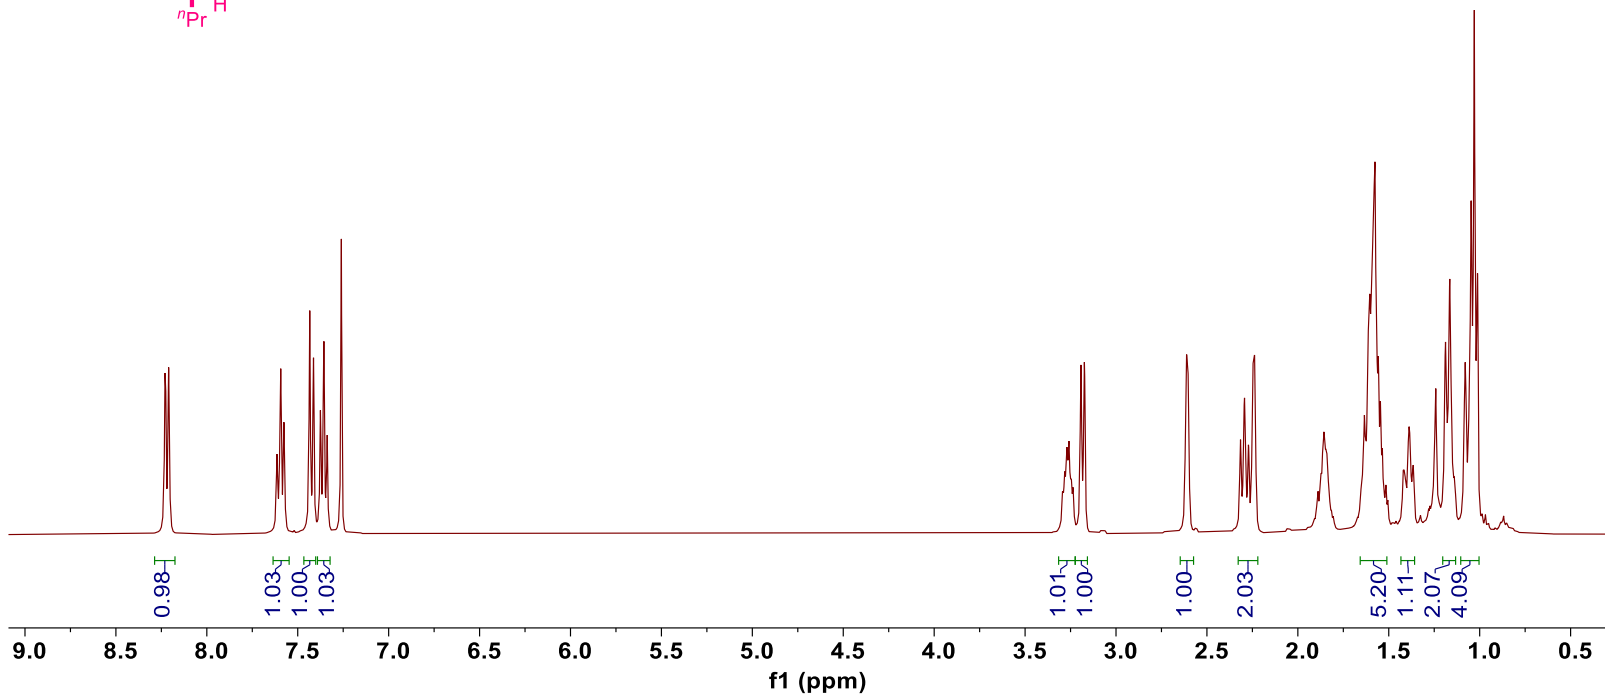



ZJK-40-2-c

— 176.52  
— 171.95  
  
— 156.99  
  
— 132.76  
— 125.89  
— 124.82  
— 124.62  
— 120.96  
— 118.08  
  
— 77.48  
— 77.16  
— 76.84  
  
— 49.46  
— 46.48  
— 43.84  
— 37.74  
— 37.04  
— 33.97  
— 29.62  
— 29.29  
— 28.49  
— 22.40  
  
— 14.46

<sup>13</sup>C-NMR (100 MHz)

Solvent: CDCl<sub>3</sub>

Scheme 3, 4af

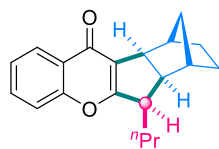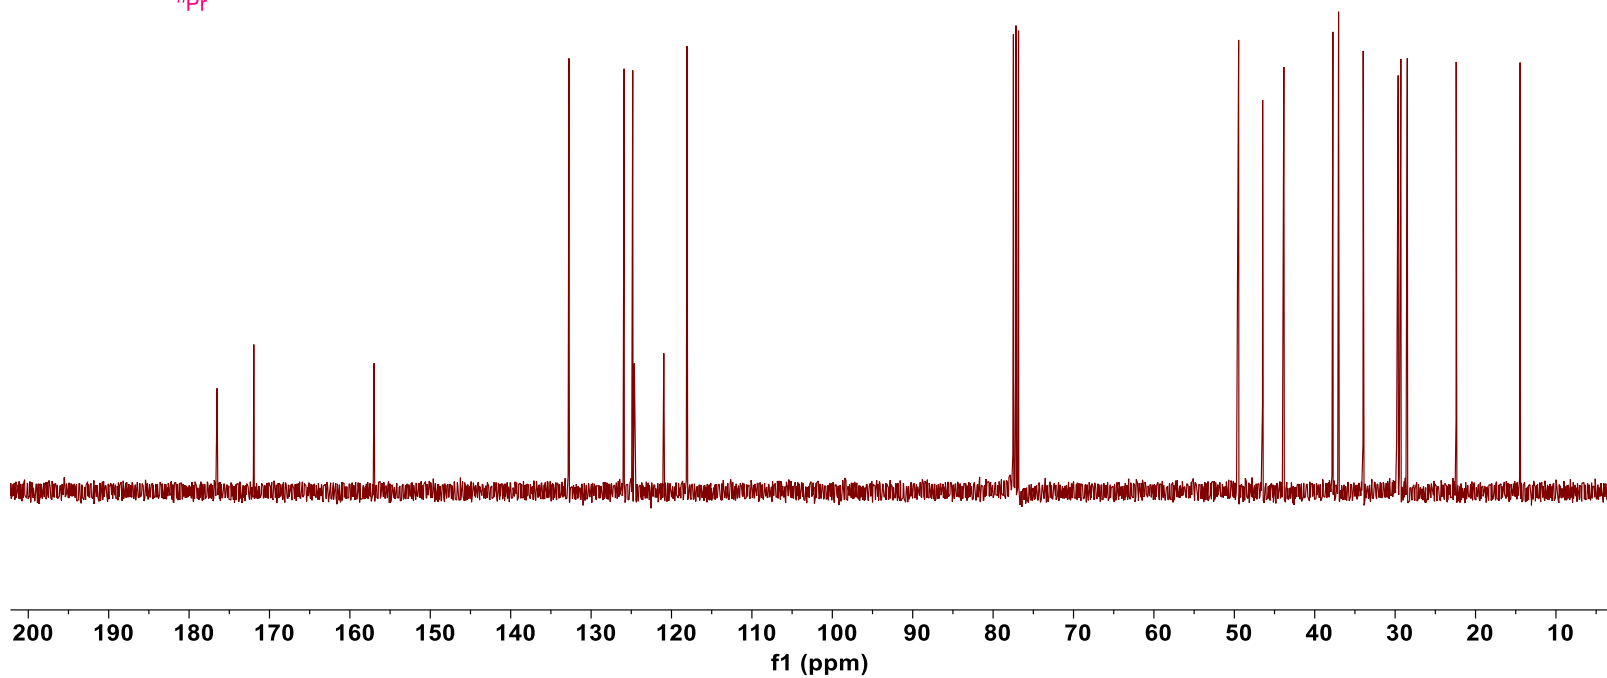

ZJK-41-1

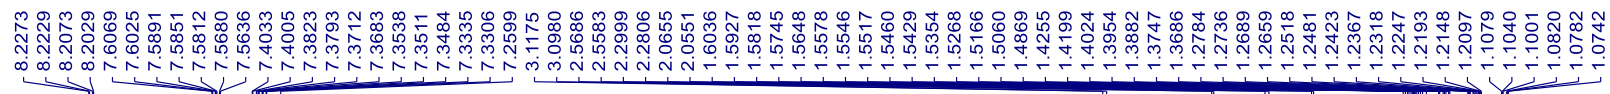

<sup>1</sup>H-NMR (400 MHz)

Solvent: CDCl<sub>3</sub>

Scheme 3, 4ag

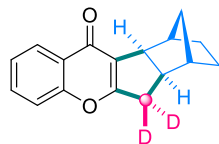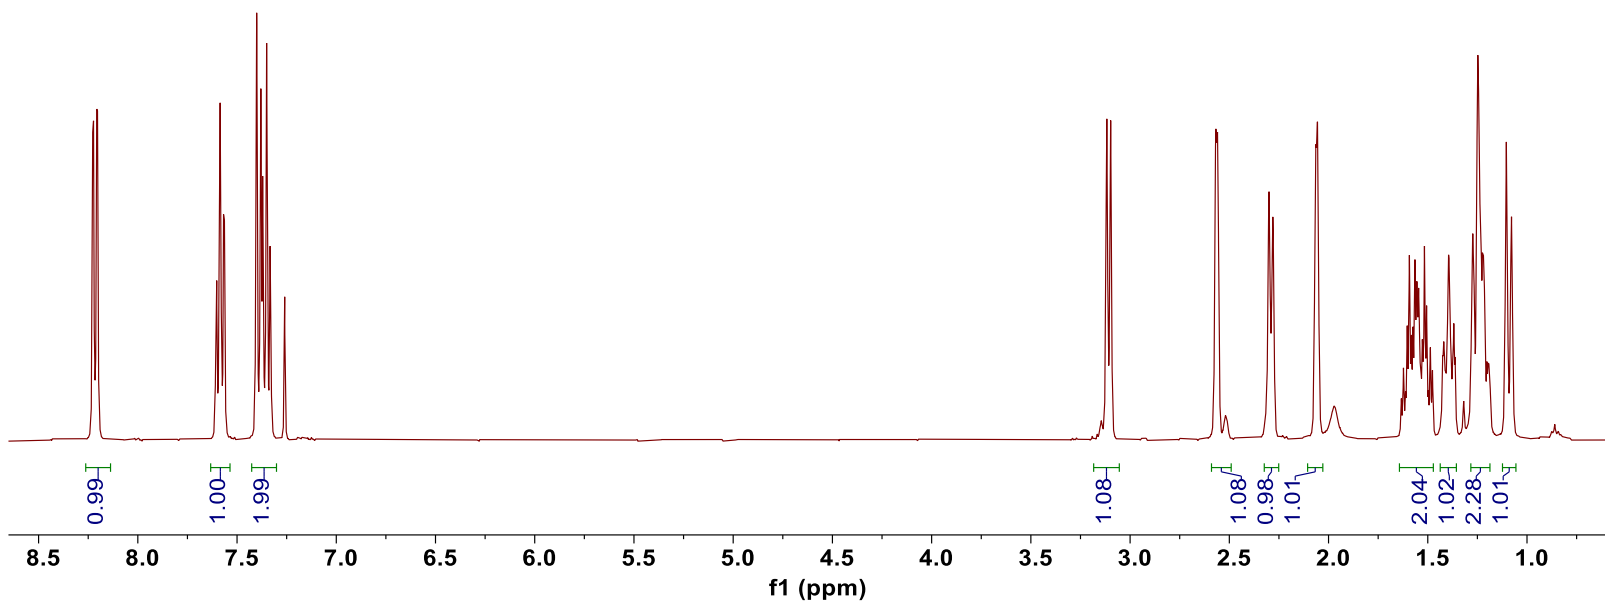

ZJK-41-1-C

— 176.35

— 169.75

— 156.97

— 132.82

— 125.88

— 124.81

— 124.43

— 122.46

— 122.41

— 117.96

— 77.48

— 77.16

— 76.84

— 49.90

— 42.88

— 40.35

— 39.28

— 38.50

— 38.14

— 38.04

— 37.84

— 37.64

— 37.44

— 32.41

— 28.85

$^{13}\text{C}$ -NMR (100 MHz)

Solvent:  $\text{CDCl}_3$

Scheme 3, 4ag

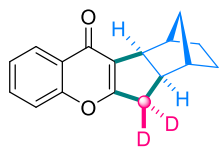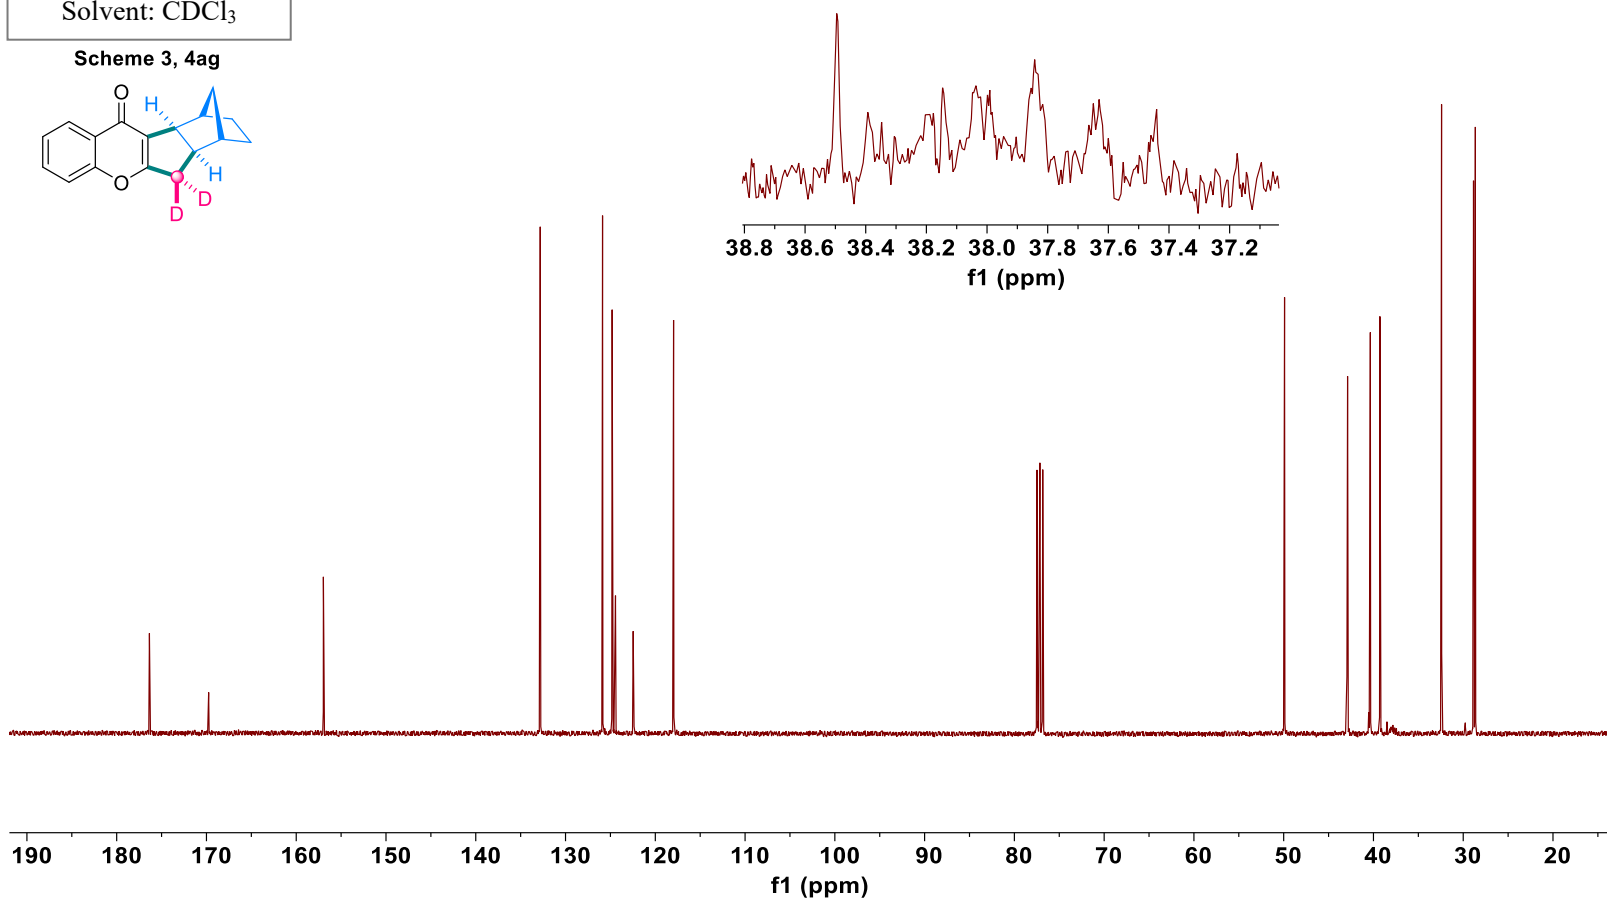

ZJK-4-2

7.4462  
7.4260  
7.4057  
7.3318  
7.3284  
7.3127  
7.3093  
7.2925  
7.2892  
7.2603  
3.1090  
3.0857  
3.0830  
3.0688  
3.0495  
2.5893  
2.5792  
2.4805  
2.3100  
2.2912  
2.2718  
2.0592  
2.0491  
1.6119  
1.5926  
1.5820  
1.5711  
1.5635  
1.5539  
1.5477  
1.5449  
1.5407  
1.5369  
1.5304  
1.5216  
1.5117  
1.5010  
1.4816  
1.4710  
1.3925  
1.3869  
1.3829  
1.3776  
1.3617  
1.3549  
1.3486  
1.3413  
1.3356  
1.3295  
1.2711  
1.2656  
1.2611  
1.2452  
1.2404  
1.2358  
1.2305  
1.2231  
1.2171  
1.2109  
1.2055  
1.2008  
1.1879  
1.1822  
1.1777  
1.1723  
1.1116  
1.1076  
1.1038  
1.0857  
1.0817  
1.0780

<sup>1</sup>H-NMR (400 MHz)  
Solvent: CDCl<sub>3</sub>

Scheme 3, 4ah

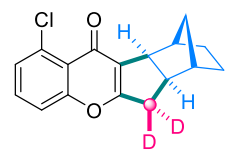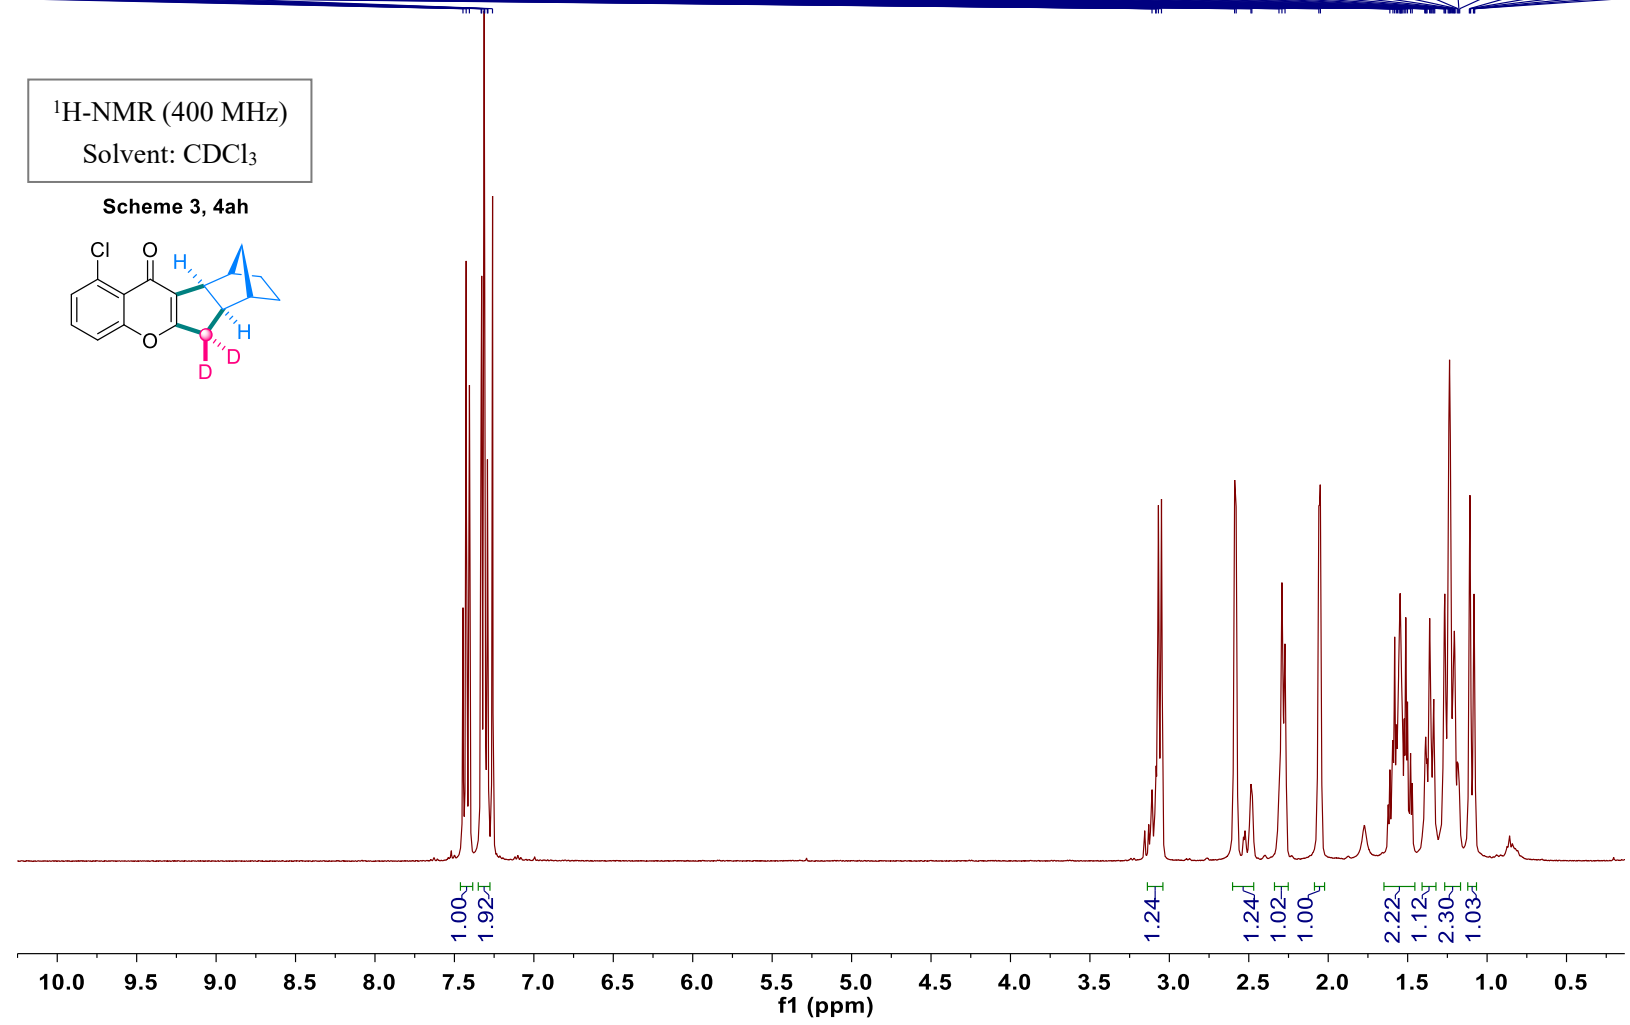

ZJK-4-2-c

— 175.35  
— 168.07  
— 158.77

— 133.80  
— 131.94  
— 128.06  
— 123.63  
— 121.38  
— 117.41

— 77.48  
— 77.16  
— 76.84

— 50.09  
— 42.82  
— 40.51  
— 39.15  
— 38.22  
— 38.12  
— 37.91  
— 37.86  
— 37.71  
— 32.45  
— 28.79  
— 28.61

$^{13}\text{C}$ -NMR (100 MHz)  
Solvent:  $\text{CDCl}_3$

Scheme 3, 4ah

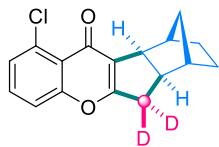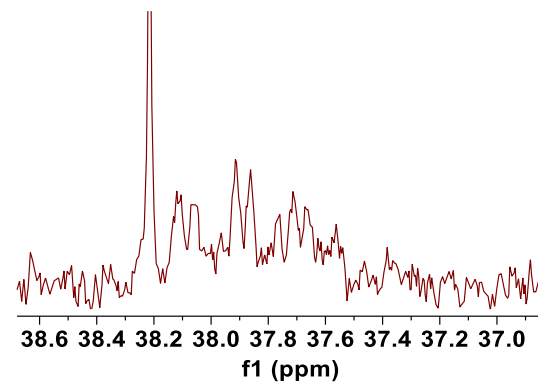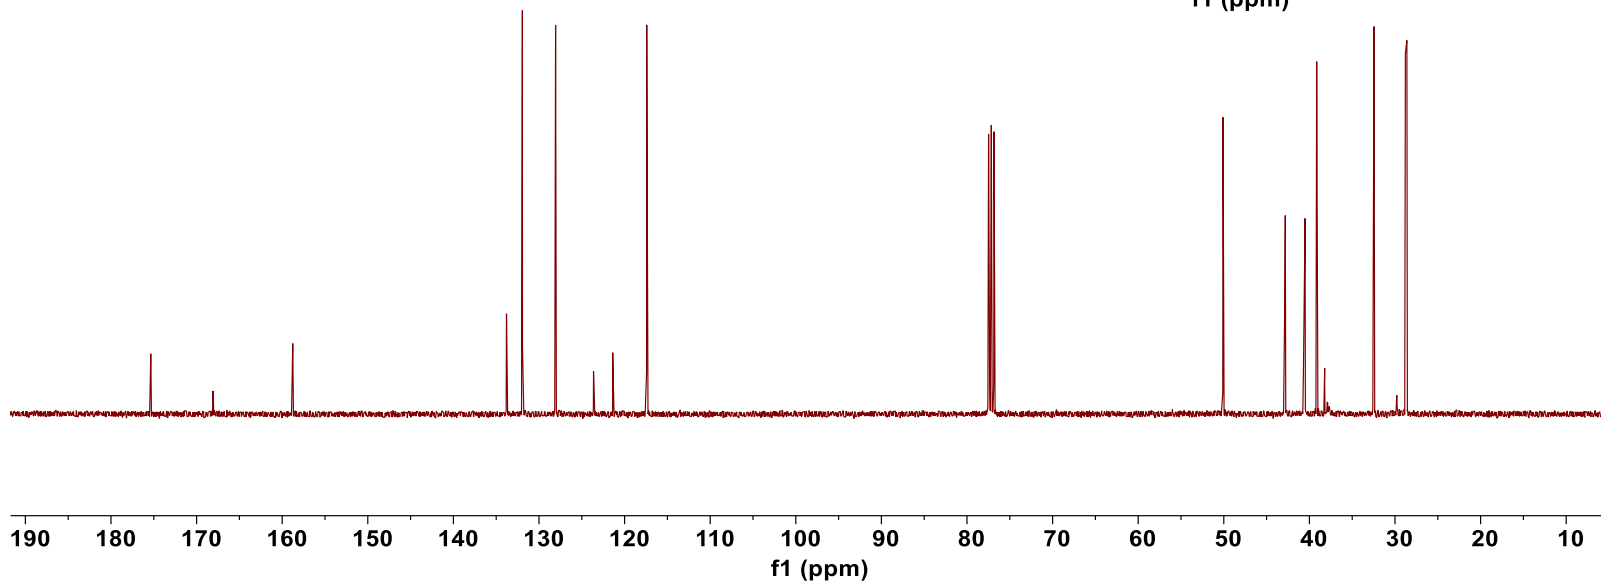

ZJK-1-1-h

7.9920  
7.9881  
7.3989  
7.3932  
7.3776  
7.3720  
7.2921  
7.2708  
7.2600  
3.1114  
3.0924  
2.5643  
2.5541  
2.4203  
2.2901  
2.2707  
2.0574  
2.0472  
1.6202  
1.6013  
1.5906  
1.5797  
1.5722  
1.5627  
1.5553  
1.5520  
1.5494  
1.5426  
1.5328  
1.5241  
1.5140  
1.5034  
1.4845  
1.4739  
1.4264  
1.4207  
1.4163  
1.4106  
1.4029  
1.3963  
1.3889  
1.3755  
1.3694  
1.3628  
1.3592  
1.3211  
1.2768  
1.2726  
1.2684  
1.2627  
1.2459  
1.2404  
1.2356  
1.2284  
1.2220  
1.2167  
1.2121  
1.2069  
1.1993  
1.1934  
1.1890  
1.1834  
1.1042  
1.1002  
1.0964  
1.0925  
1.0885  
1.0784  
1.0746  
1.0706  
1.0668  
1.0629

<sup>1</sup>H-NMR (400 MHz)  
Solvent: CDCl<sub>3</sub>

Scheme 3, 4ai

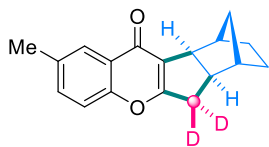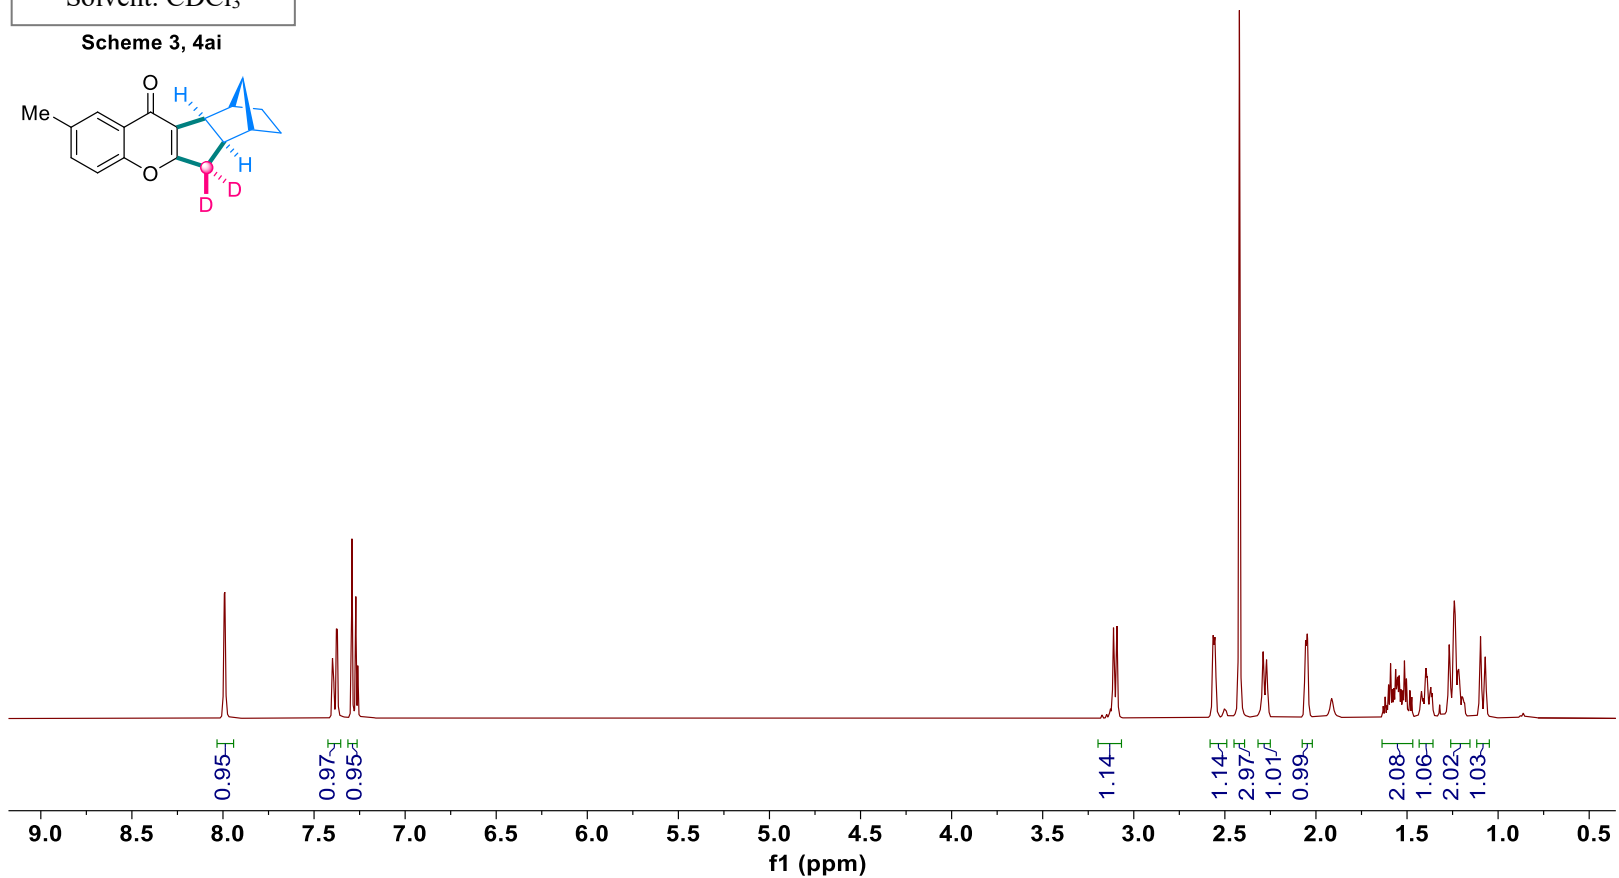

ZJK-1-1-c

— 176.50

— 169.68

— 155.31

— 134.69

— 134.01

— 125.31

— 124.12

— 122.32

— 117.70

— 77.48

— 77.16

— 76.84

— 49.94

— 42.94

— 40.51

— 40.41

— 39.32

— 38.51

— 38.21

— 38.03

— 37.85

— 37.65

— 37.46

— 32.44

— 28.89

— 28.70

— 20.97

$^{13}\text{C}$ -NMR (100 MHz)  
Solvent:  $\text{CDCl}_3$   
Scheme 3, 4ai

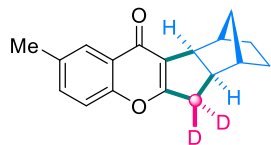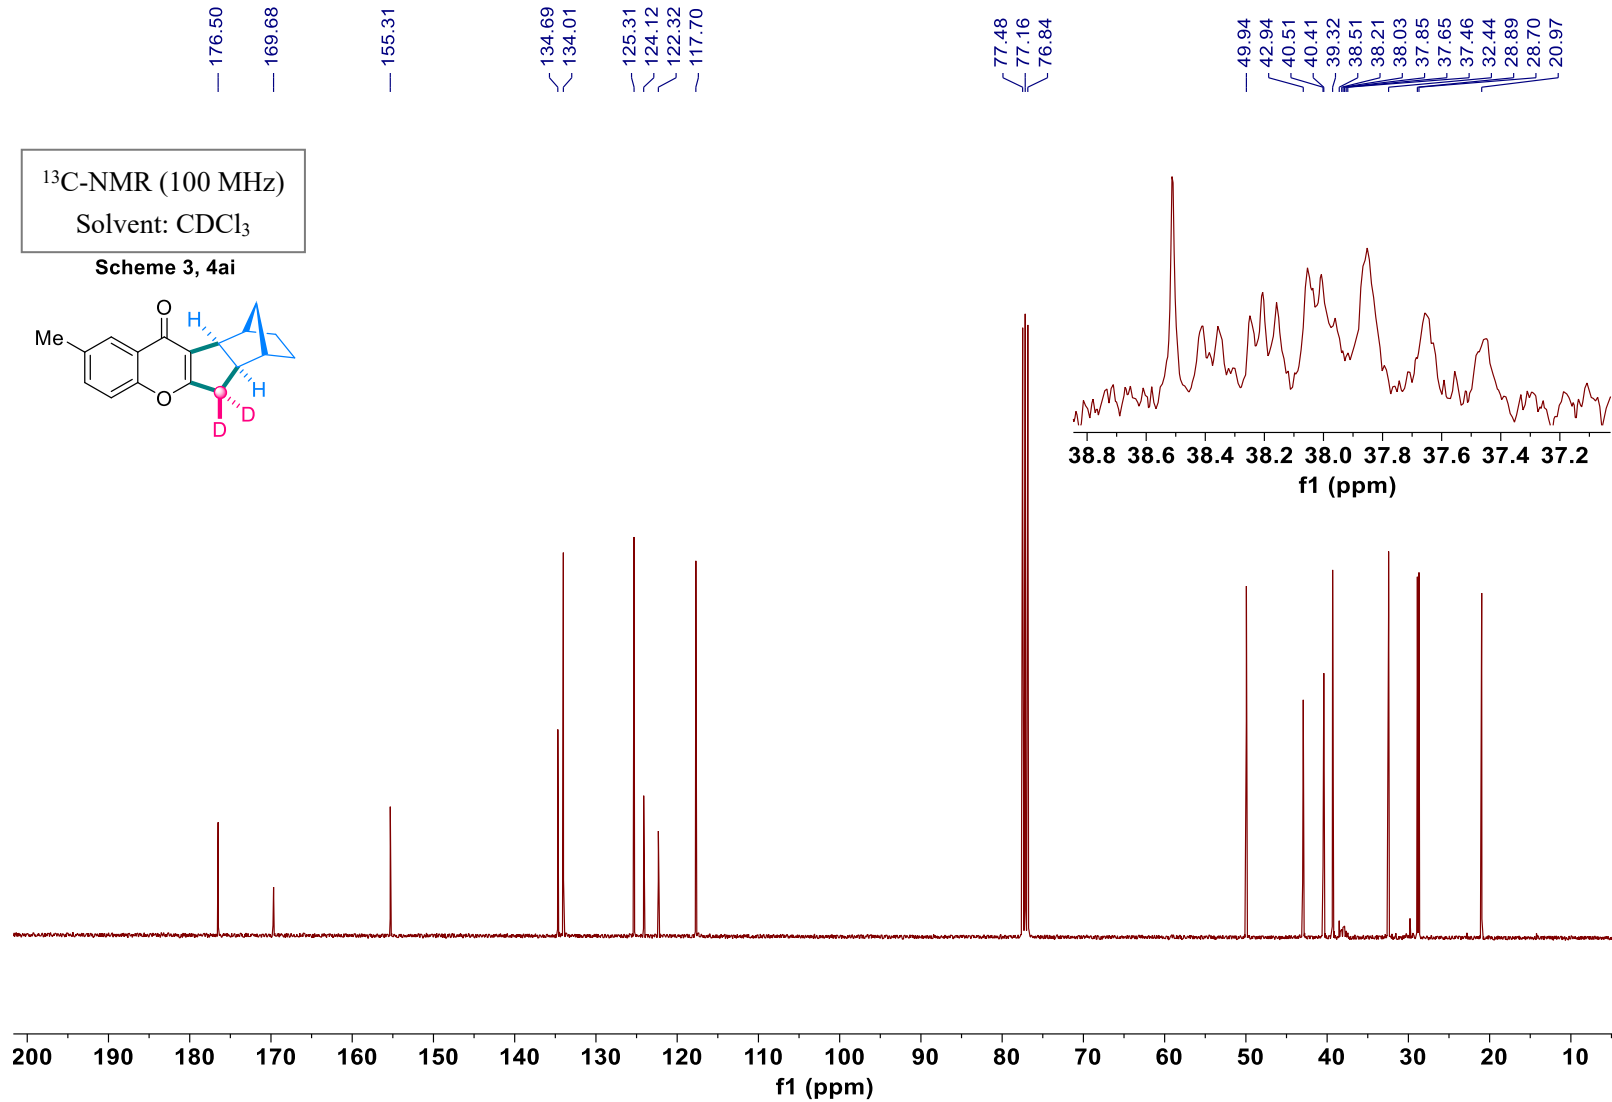

ZJK-1-2-h

8.0925  
8.0725  
7.2601  
7.1680  
7.1461  
7.1421  
7.1421  
3.1205  
3.1001  
3.0811  
2.5962  
2.5623  
2.5522  
2.5017  
2.4954  
2.4903  
2.4391  
2.3039  
2.2842  
2.2651  
2.0542  
2.0439  
1.6277  
1.6172  
1.6069  
1.5983  
1.5874  
1.5766  
1.5692  
1.5597  
1.5521  
1.5487  
1.5399  
1.5300  
1.5215  
1.5112  
1.5006  
1.4915  
1.4816  
1.4710  
1.4208  
1.4152  
1.4104  
1.4053  
1.3972  
1.3908  
1.3836  
1.3700  
1.3641  
1.3572  
1.2431  
1.2356  
1.2253  
1.2189  
1.2136  
1.2090  
1.1957  
1.1890  
1.1856  
1.1801  
1.0988  
1.0949  
1.0908  
1.0731  
1.0693  
1.0652

<sup>1</sup>H-NMR (400 MHz)

Solvent: CDCl<sub>3</sub>

Scheme 3, 4aj

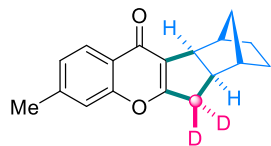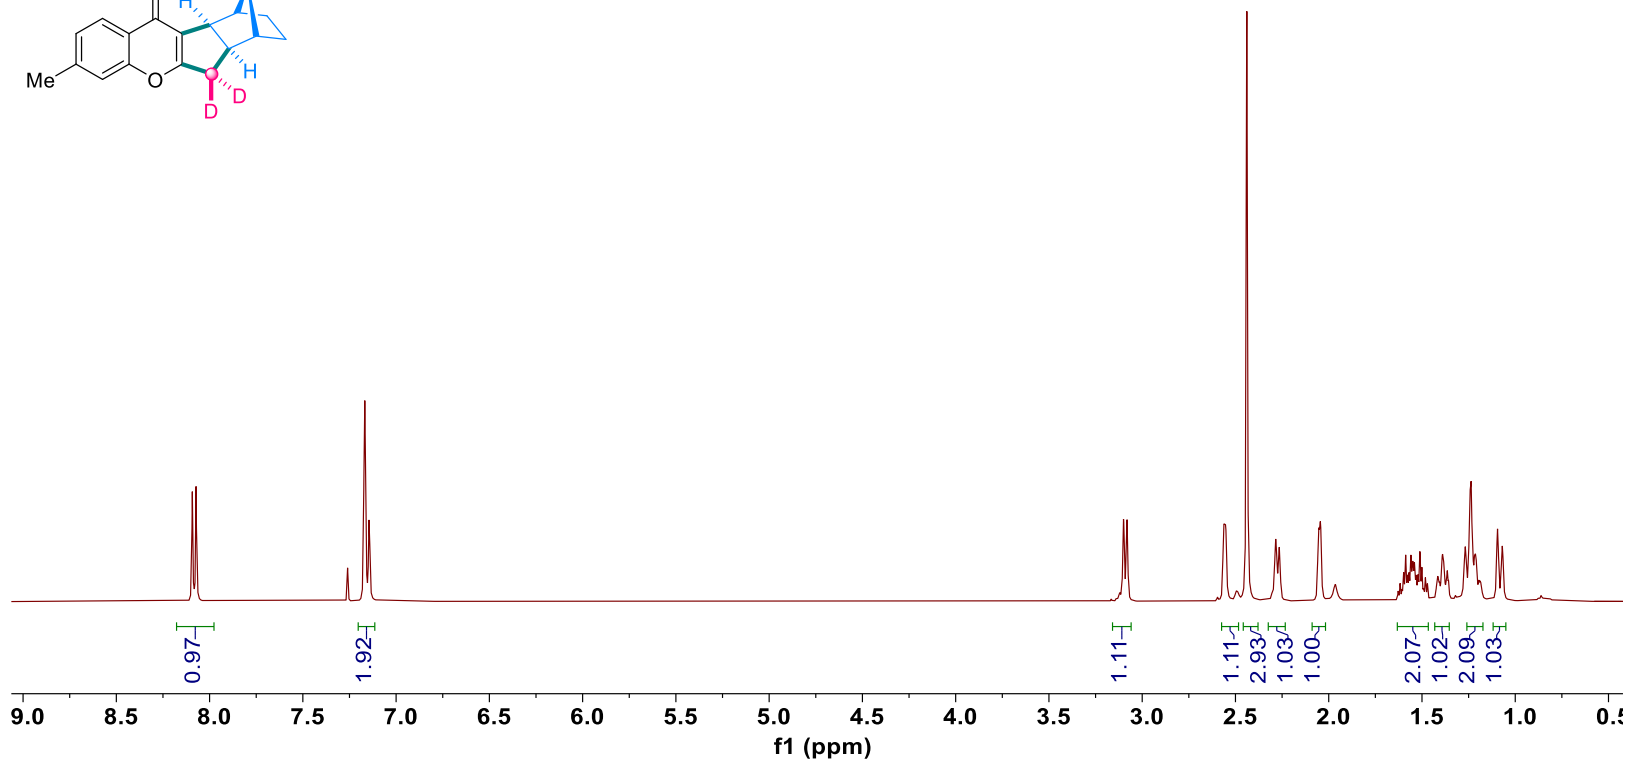



ZJK-1-2-C

— 176.40  
— 169.45  
— 157.18  
— 144.00  
126.28  
125.65  
122.31  
122.21  
117.79  
77.48  
77.16  
76.84  
49.92  
42.92  
40.41  
39.32  
38.49  
38.19  
38.00  
37.83  
37.64  
32.43  
28.89  
28.69  
21.77

<sup>13</sup>C-NMR (100 MHz)  
Solvent: CDCl<sub>3</sub>

Scheme 3, 4aj

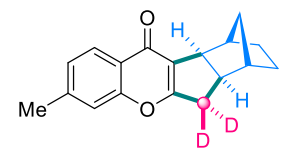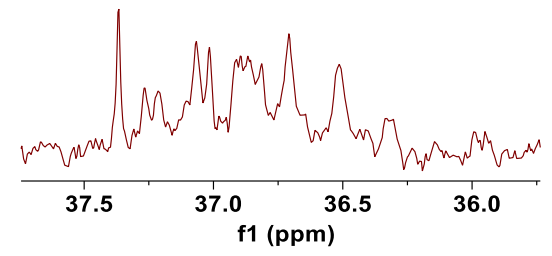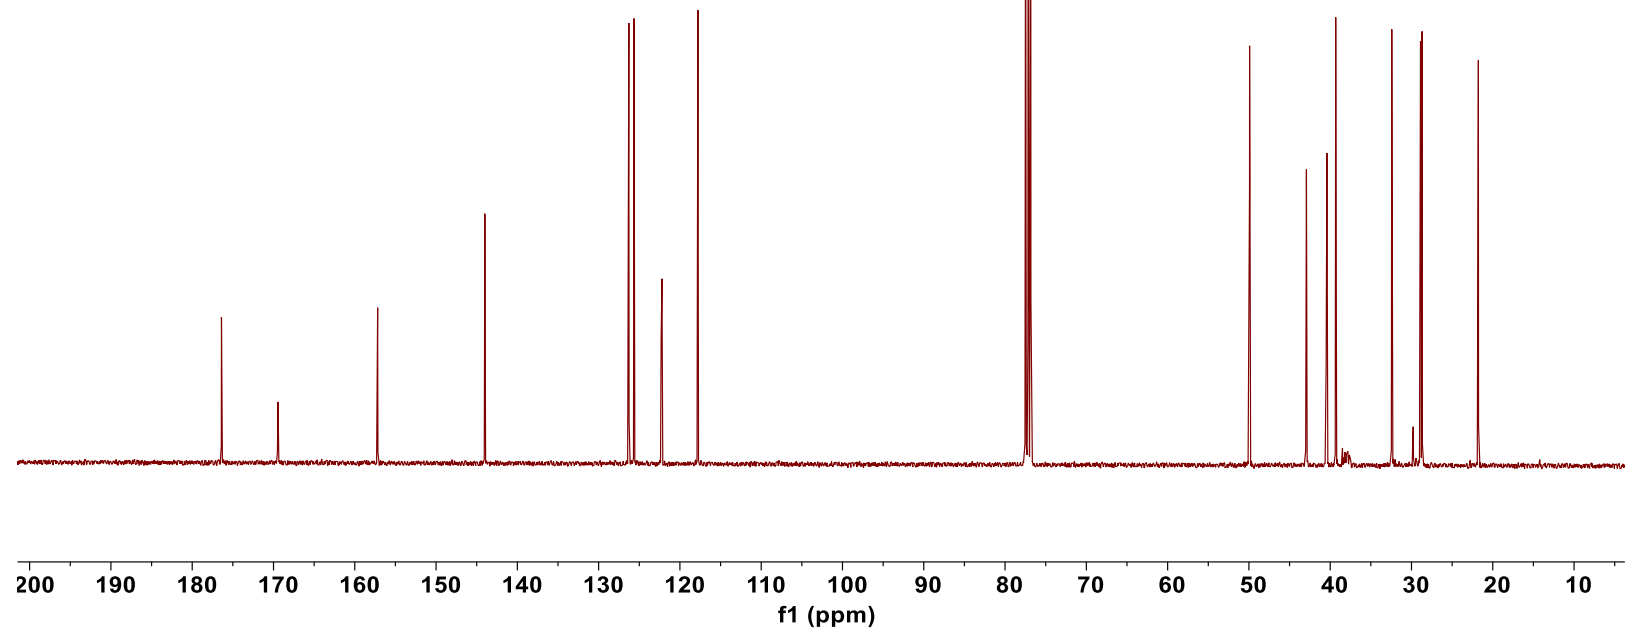

ZJK-2-1-h

8.1142  
8.1098  
8.0943  
8.0898  
7.4712  
7.4696  
7.4683  
7.4654  
7.4533  
7.4516  
7.3014  
7.2975  
7.2791  
7.2602  
5.3249  
3.2103  
3.1853  
3.1637  
3.1444  
2.6187  
2.6086  
2.5870  
2.4788  
2.3484  
2.3291  
2.1139  
2.1037  
1.6779  
1.6675  
1.6571  
1.6485  
1.6377  
1.6266  
1.6195  
1.6100  
1.6002  
1.5909  
1.5811  
1.5727  
1.5625  
1.5518  
1.5426  
1.5328  
1.5222  
1.4725  
1.4656  
1.4569  
1.4486  
1.4428  
1.4357  
1.4216  
1.4157  
1.4090  
1.3283  
1.3238  
1.3193  
1.2991  
1.2926  
1.2780  
1.2711  
1.2679  
1.2631  
1.2500  
1.2451  
1.2407  
1.2340  
1.1504  
1.1466  
1.1246  
1.1208

<sup>1</sup>H-NMR (400 MHz)

Solvent: CDCl<sub>3</sub>

Scheme 3, 4ak

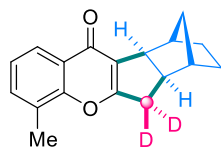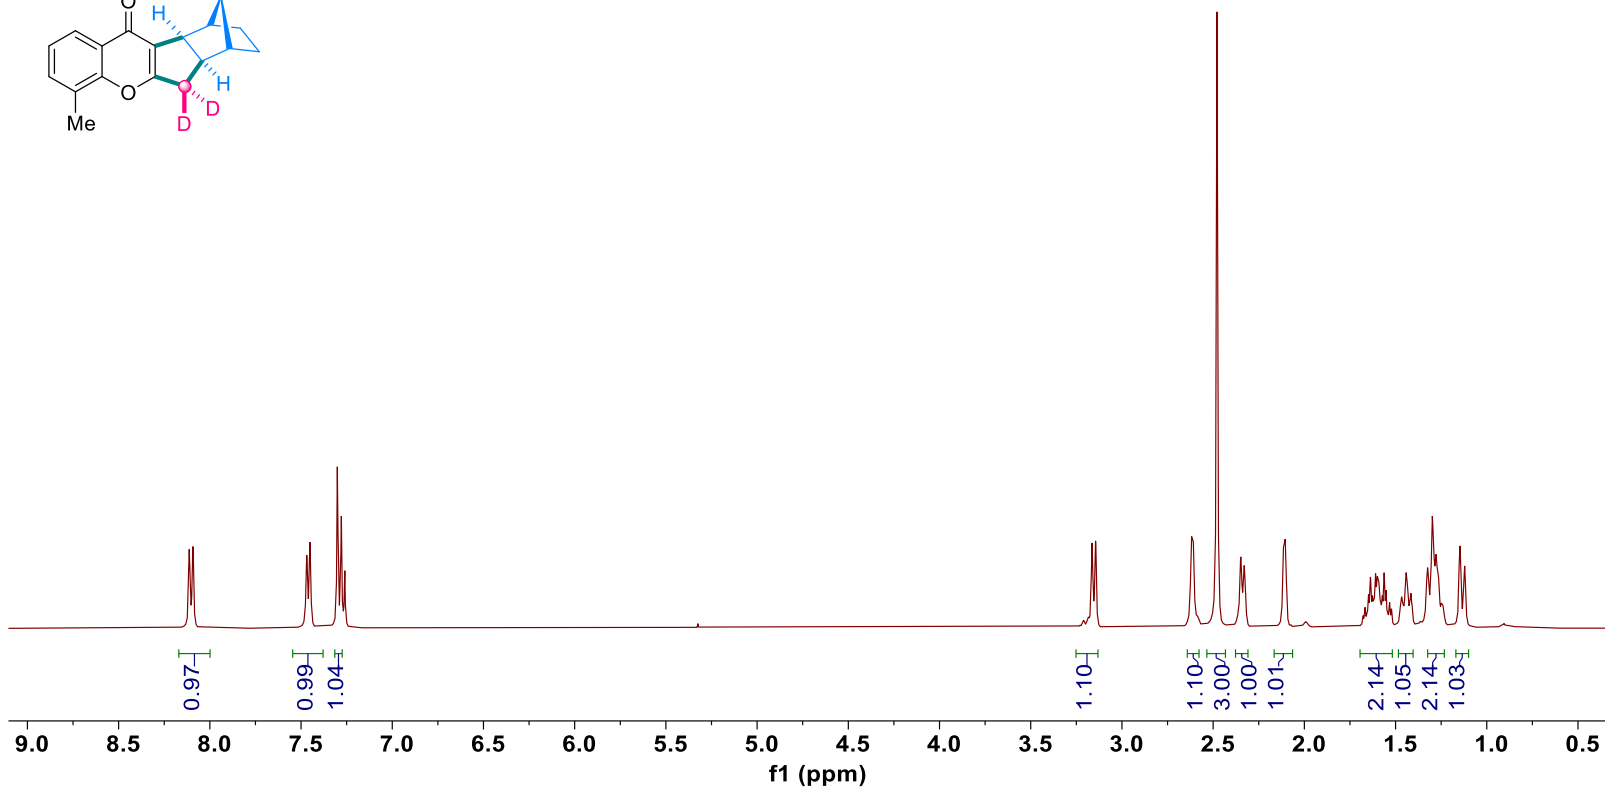

ZJK-2-1-C

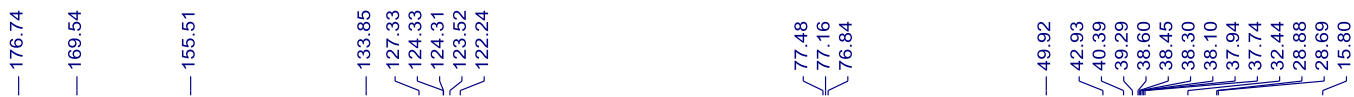

$^{13}\text{C}$ -NMR (100 MHz)

Solvent:  $\text{CDCl}_3$

Scheme 3, 4ak

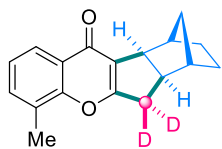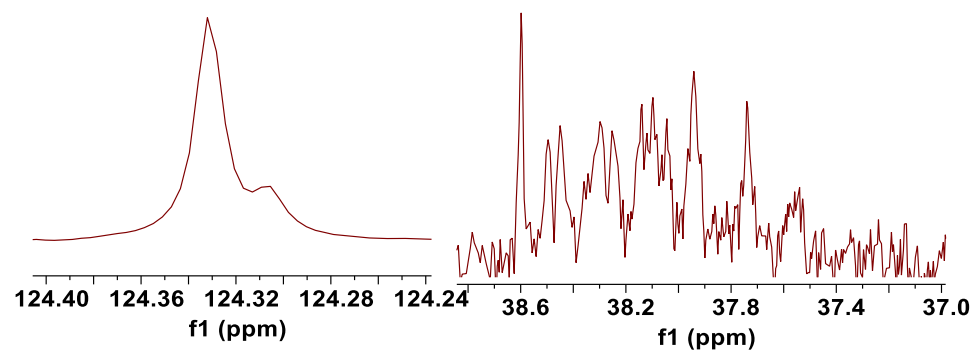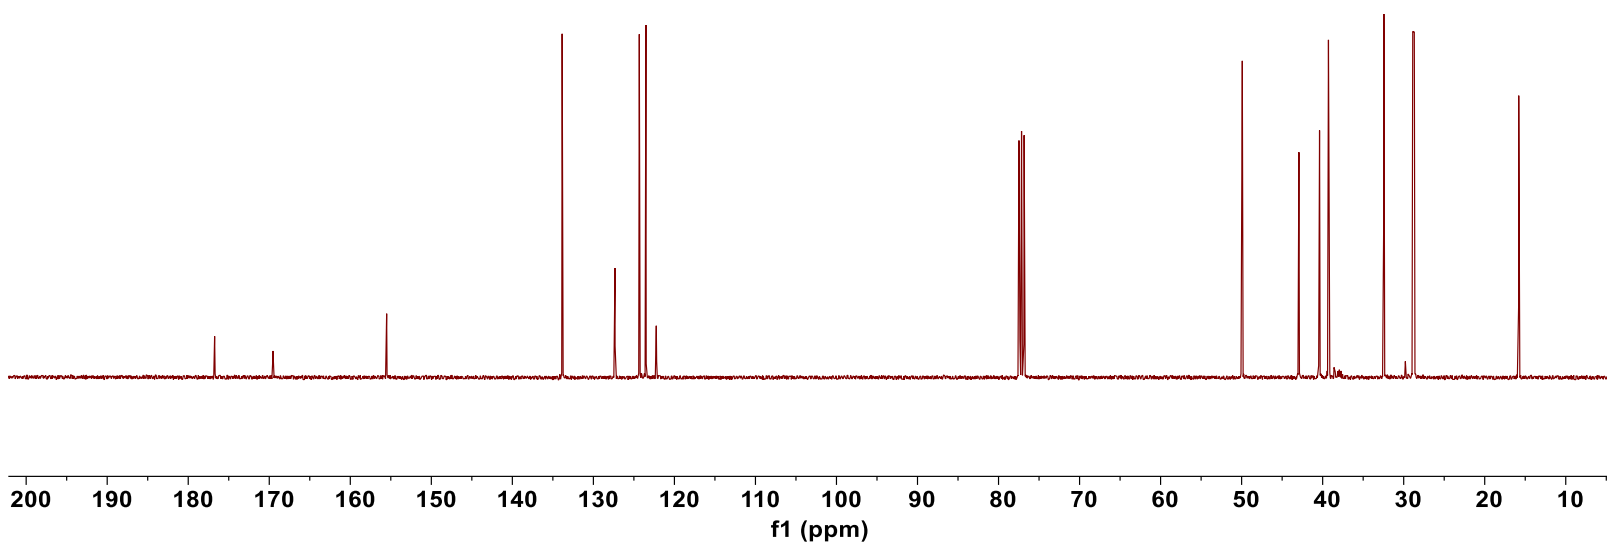

ZJK-7-1-h

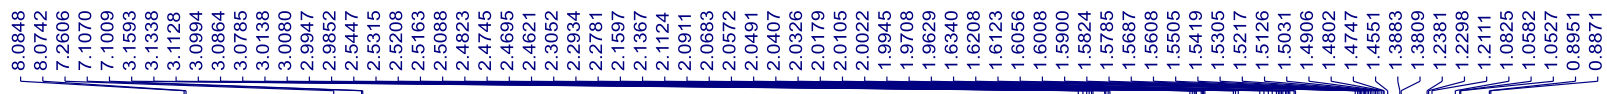

<sup>1</sup>H-NMR (400 MHz)

Solvent: CDCl<sub>3</sub>

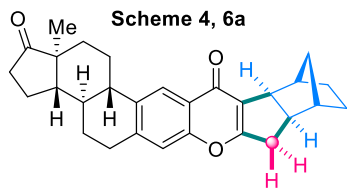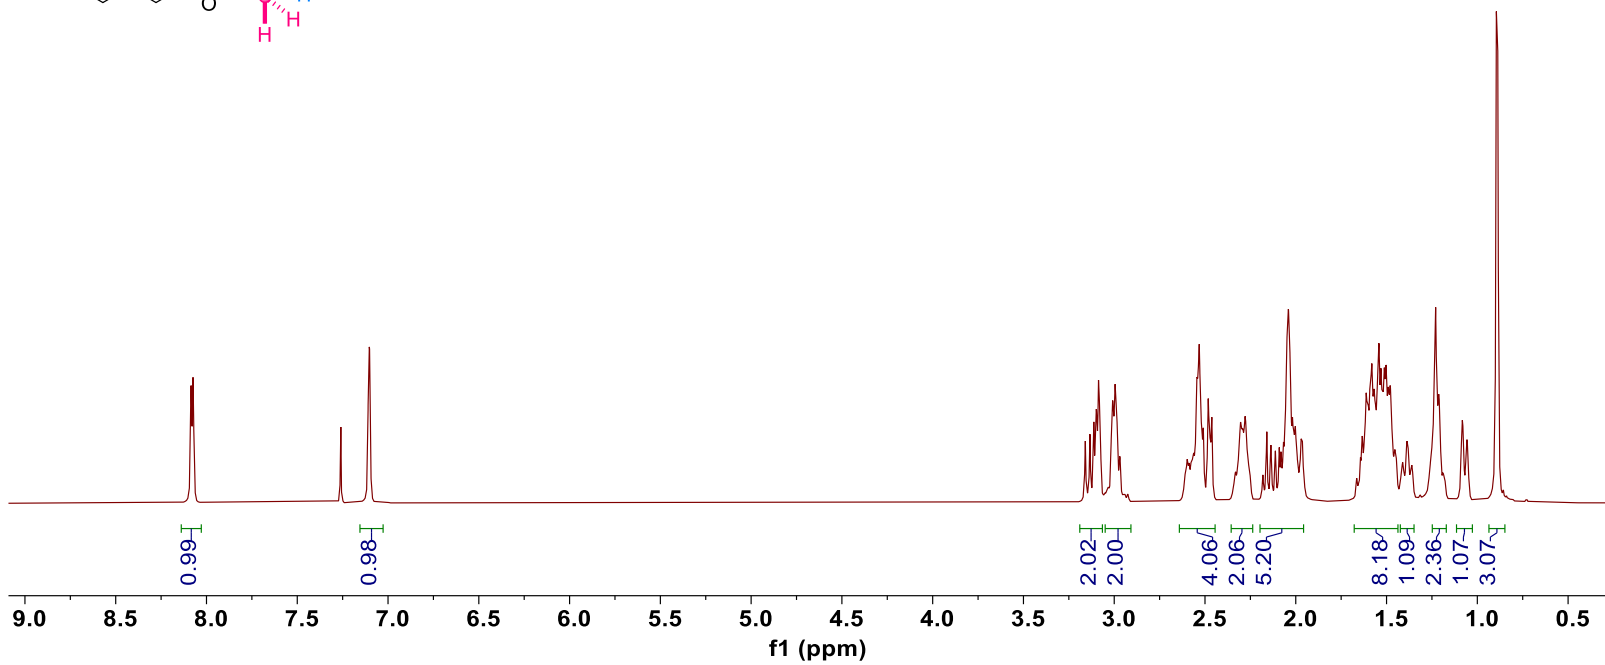

ZJK-7-1-c

— 220.69

— 176.44

— 169.47

— 169.43

— 155.26

— 142.99

— 142.98

— 137.41

— 137.37

— 122.20

— 122.09

— 122.07

— 121.93

— 117.24

— 117.22

77.48

77.16

76.84

50.57

50.56

49.92

47.99

47.97

44.17

44.16

43.01

40.53

40.51

39.31

39.28

38.49

38.00

37.97

35.91

32.40

32.39

31.46

29.67

29.65

28.89

28.86

28.68

26.22

26.19

25.89

25.84

21.68

13.87

13.85

<sup>13</sup>C-NMR (100 MHz)  
Solvent: CDCl<sub>3</sub>

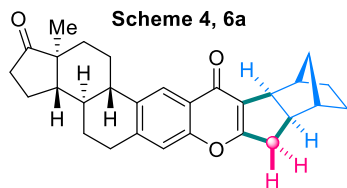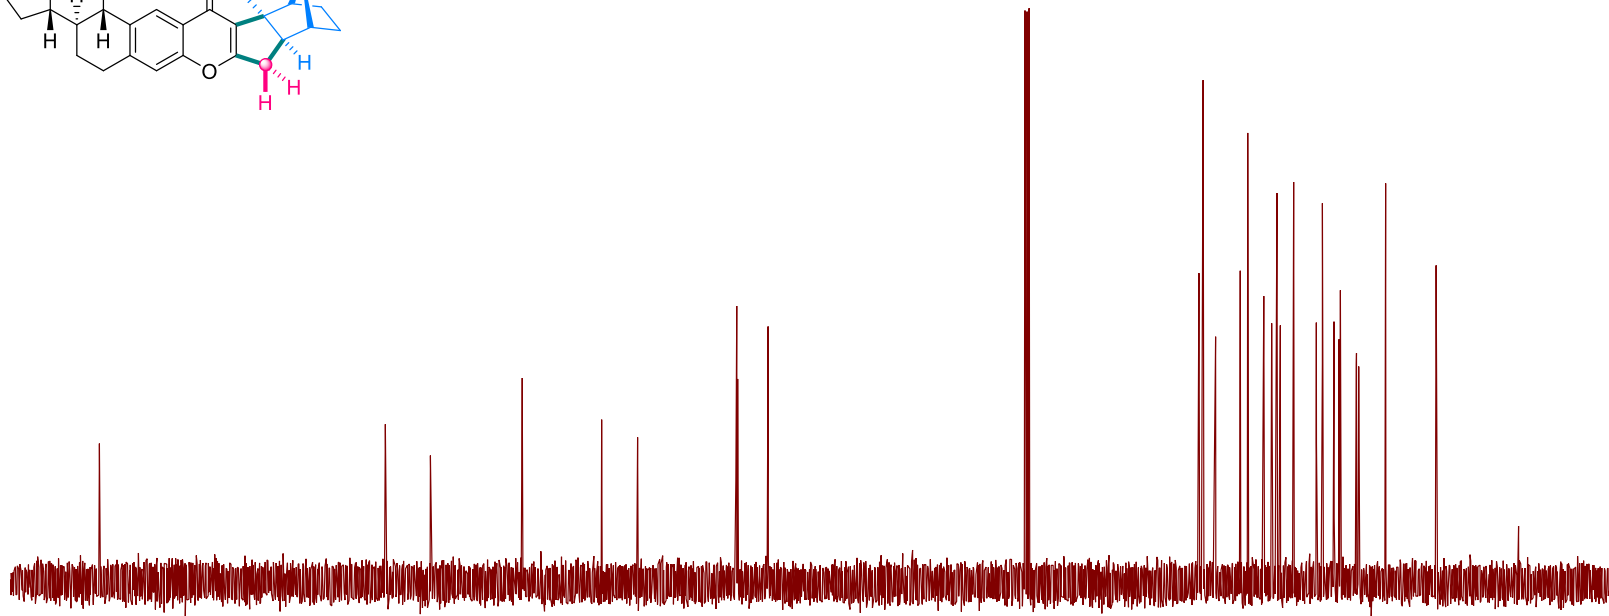

230 220 210 200 190 180 170 160 150 140 130 120 110 100 90 80 70 60 50 40 30 20 10 0 -10

f1 (ppm)

S100

ZJK-8-1-h

8.0890  
8.0783  
7.2606  
7.1104  
7.1044  
3.1007  
3.0820  
3.0140  
2.9982  
2.9880  
2.9718  
2.5757  
2.5669  
2.5442  
2.5336  
2.5111  
2.4852  
2.4647  
2.3094  
2.2969  
2.2790  
2.2596  
2.1626  
2.1395  
2.1152  
2.0938  
2.0834  
2.0707  
2.0515  
2.0427  
2.0356  
2.0205  
2.0125  
2.0050  
1.9974  
1.9816  
1.9736  
1.9658  
1.6462  
1.6367  
1.6235  
1.6148  
1.6079  
1.6040  
1.5925  
1.5851  
1.5812  
1.5716  
1.5638  
1.5528  
1.5452  
1.5337  
1.5246  
1.5156  
1.5059  
1.4932  
1.4834  
1.4785  
1.4585  
1.4526  
1.4114  
1.3908  
1.3832  
1.2696  
1.2660  
1.2537  
1.2334  
1.2118  
1.0849  
1.0590  
0.8977  
0.8897

<sup>1</sup>H-NMR (400 MHz)

Solvent: CDCl<sub>3</sub>

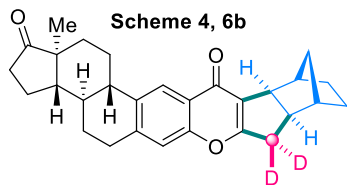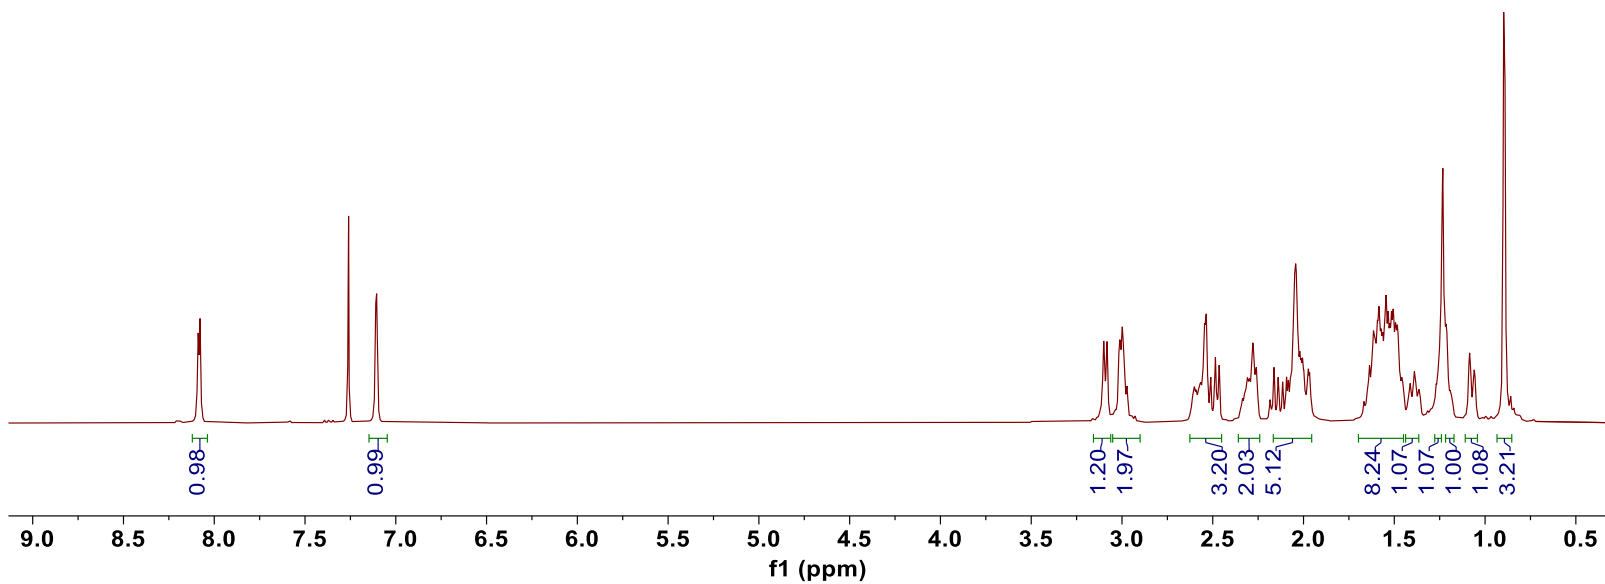

S101

ZJK-8-1-C

220.70  
220.68

176.46  
169.41  
169.37

155.28

143.00  
142.98  
137.42  
137.37

122.21  
122.10  
122.08  
122.03  
117.25  
117.23

77.48  
77.16  
76.84  
50.57  
50.56  
49.91  
47.99  
47.98  
44.18  
44.16  
43.02  
42.94  
40.44  
40.42  
40.35  
40.33  
39.31  
39.28  
38.01  
37.98

35.91  
32.41  
31.46  
29.79  
29.67  
29.66  
28.89  
28.86  
28.68  
26.23  
26.20  
25.89  
25.85  
21.68  
13.87  
13.85

<sup>13</sup>C-NMR (100 MHz)  
Solvent: CDCl<sub>3</sub>

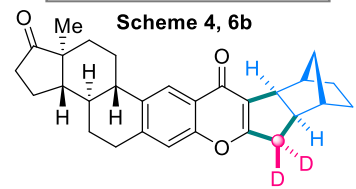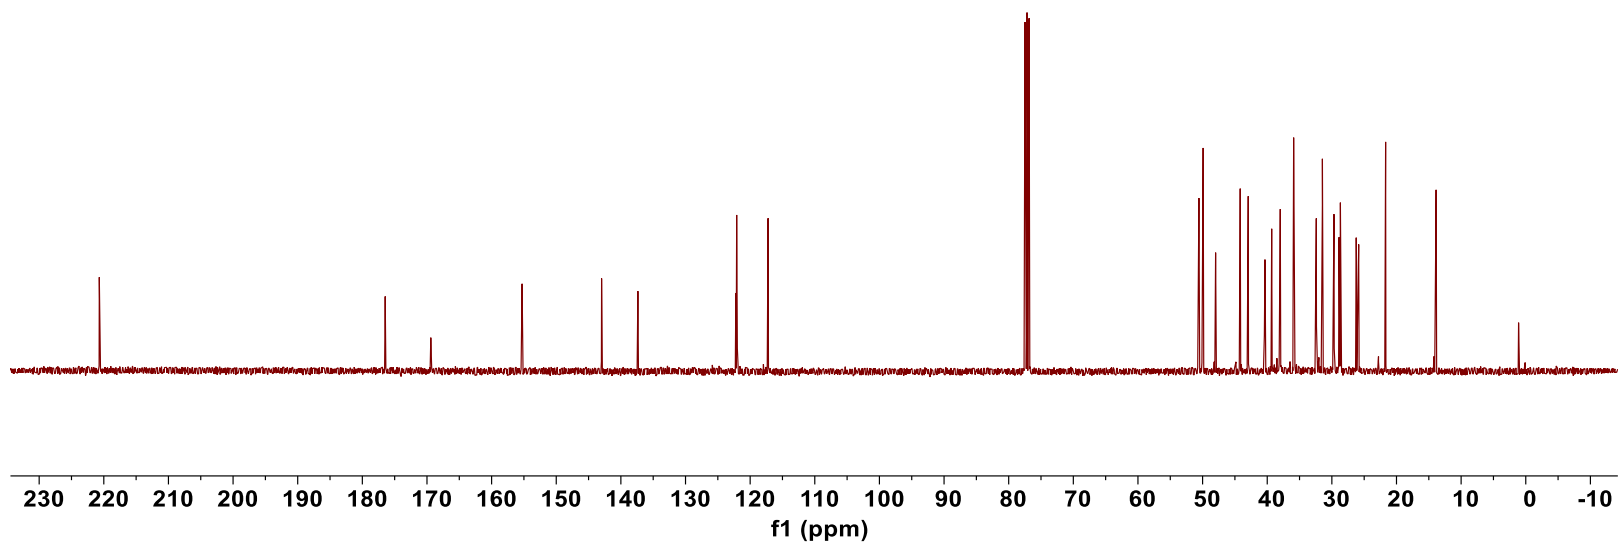

Supplement: d4ob00329b1.pdf [file d4ob00329b1.pdf]
